# Supplementary material for: Computational study of Cu-catalyzed 1,2-hydrocarboxylation of 1,3-dienes with CO2: Pauli repulsion-controlled regioselectivity of Cu–Bpin additions
Source: Royal Society of Chemistry journal article supplement (doi:10.1039/d2qo00236a), 2022-01-01
Supplement: d2qo00236a1.pdf [file d2qo00236a1.pdf]

## Electronic Supplementary Information

### Computational study of Cu-catalyzed 1,2-hydrocarboxylation of 1,3-dienes with CO<sub>2</sub>: Pauli repulsion-controlled regioselectivity of Cu–Bpin additions

Yanlei Hu<sup>†</sup>, Lingfei Hu<sup>†</sup>, Han Gao<sup>†</sup>, Xiangying Lv<sup>†</sup>, Yan-Bo Wu<sup>‡</sup> and Gang Lu<sup>\*,†</sup>

<sup>†</sup> School of Chemistry and Chemical Engineering, Key Laboratory of Colloid and Interface Chemistry, Ministry of Education, Shandong University, Jinan, Shandong 250100, China

<sup>‡</sup> Key Lab for Materials of Energy Conversion and Storage of Shanxi Province and Key Lab of Chemical Biology and Molecular Engineering of Ministry of Education, Institute of Molecular Science, Shanxi University, Taiyuan, Shanxi 030006, China

Corresponding Author: [ganglu@sdu.edu.cn](mailto:ganglu@sdu.edu.cn)

#### Table of Contents

|                                                                                            |     |
|--------------------------------------------------------------------------------------------|-----|
| Transition States of CO <sub>2</sub> Insertion into Allyl-Cu Intermediates 3a and 5a ..... | S2  |
| Transition States of Cu–C Protonations .....                                               | S3  |
| Transition States of CO <sub>2</sub> Insertion and 1,3-Cu Migration of Allyl-Cu 8a.....    | S4  |
| EDA Results of Regioselective Cu–Bpin Addition Transition States .....                     | S5  |
| Additional Computational Results.....                                                      | S6  |
| Energy Terms of EDA along IRC .....                                                        | S9  |
| Cartesian Coordinates (Å) and Energies of the Optimized Structures .....                   | S11 |

## Transition States of CO<sub>2</sub> Insertion into Allyl-Cu Intermediates **3a** and **5a**

The allyl-Cu species **3a** and **5a** are derived from the Cu–Bpin addition across 1,3-diene (**1**) via **TS1-34**. It is a straightforward mechanism for CO<sub>2</sub> insertion into these allyl-Cu intermediates, which competes with the pathway of Cu–C protonation with MeOH (**TS3**, reported in Fig. 2 in the main text). The computed barriers of CO<sub>2</sub> insertion via both 6- and 3-membered transition states (**s-TS1**, **s-TS3** and **s-TS2**, **s-TS4** in Fig. S1) are higher than that of Cu–C protonation (**TS3**,  $\Delta G^\ddagger = 17.9$  kcal/mol). This indicates that the process of Cu–C protonation is superior to CO<sub>2</sub> insertion.

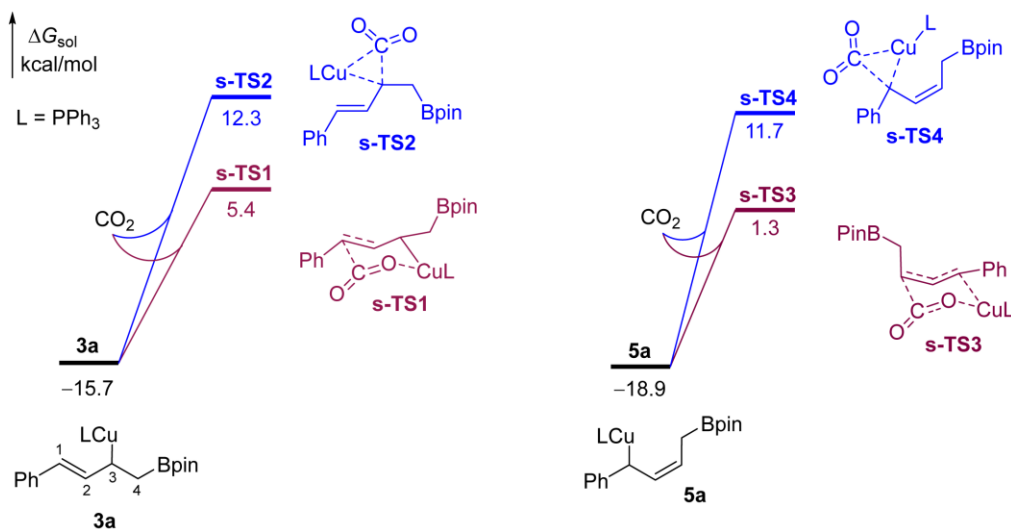

**Fig. S1.** Energy profiles for the disfavored CO<sub>2</sub> insertion pathways.

## Transition States of Cu–C Protonations

As shown in Fig. S2, the low barrier of Cu–C protonation (**TS3**,  $\Delta G^\ddagger = 17.9$  kcal/mol) is mostly due to the stabilizing interactions of Cu–O (2.28 Å) and Cu– $\pi$  (2.33 and 2.54 Å). In contrast, the transition state (**s-TS5**) without these interactions requires a much higher barrier ( $\Delta G^\ddagger = 26.7$  kcal/mol).

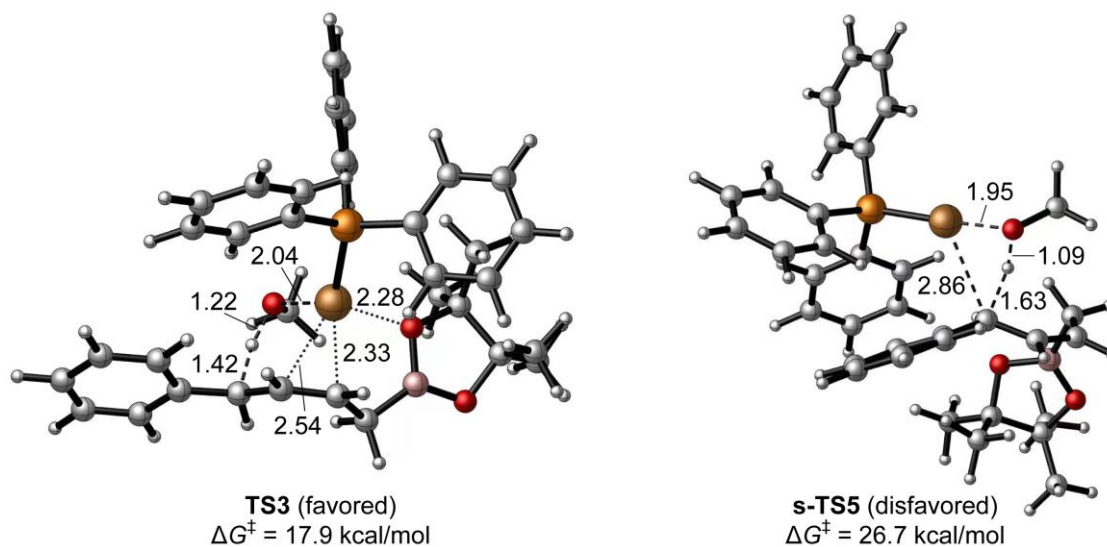

**Fig. S2.** Optimized transition states of Cu–C protonation with MeOH. Key bond distances are given in Å.

## Transition States of CO<sub>2</sub> Insertion and 1,3-Cu Migration of Allyl-Cu **8a**

As discussed in the manuscript, after the formation of allyl-Cu **8a**, the CO<sub>2</sub> insertion via 6-membered transition state (**TS8**) can afford the 1,2-hydrocarboxylation product of 1,3-butadienes. The 3-membered transition state (**s-TS6**, Fig. S3), giving the 1,4-hydrocarboxylation product, requires a much higher barrier. In addition, although the allyl-Cu **8a** can isomerize to **8b** via 1,3-Cu migration transition state (**s-TS7**), the subsequent CO<sub>2</sub> insertion is less favorable than **TS8** (see Fig. 3).

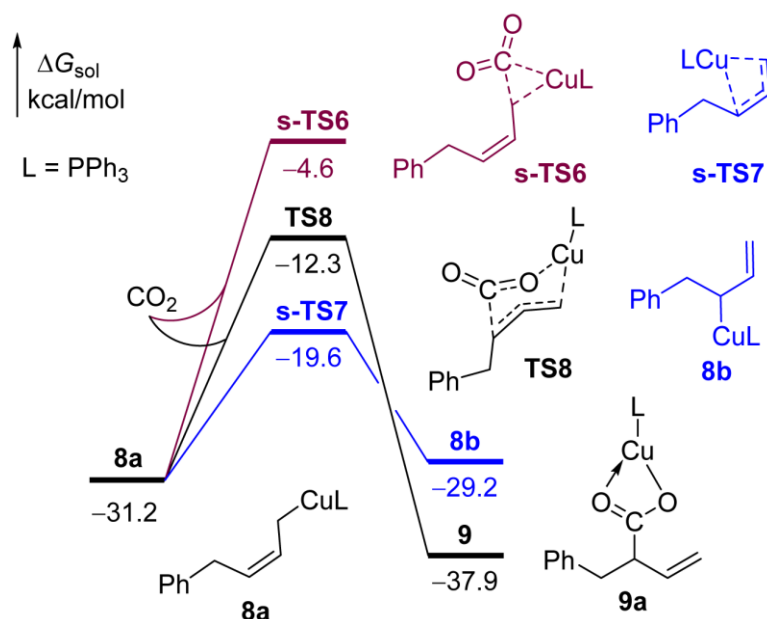

**Fig. S3.** Energy profiles of CO<sub>2</sub> insertion and 1,3-Cu migration.

## EDA Results of Regioselective Cu–Bpin Addition Transition States

The comparison between **TS1-34** and **TS1-21** has been discussed in the main text (Fig. 5). Fig. S4 and S5 show the EDA results of **TS1-12** and **TS1-43** by comparing with the most favorable **TS1-34**, respectively. The results suggest that the difference of Pauli repulsion is the dominant factor for the barrier difference. The closed-shell repulsion between copper d orbital and carbon p orbital of 1,3-butadiene accounts for the difference of Pauli repulsion.

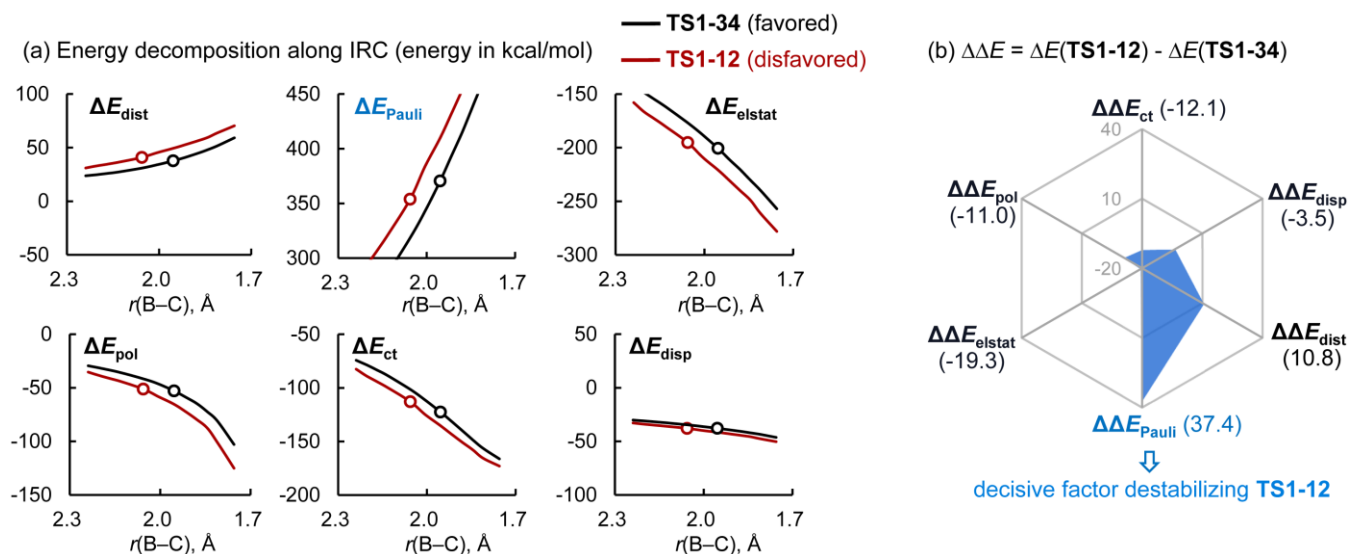

**Fig. S4.** (a) EDA results along IRC for the regioselective transition states (**TS1-34** and **TS1-12**). (b) Comparison of each energy term between **TS1-34** and **TS1-12**.

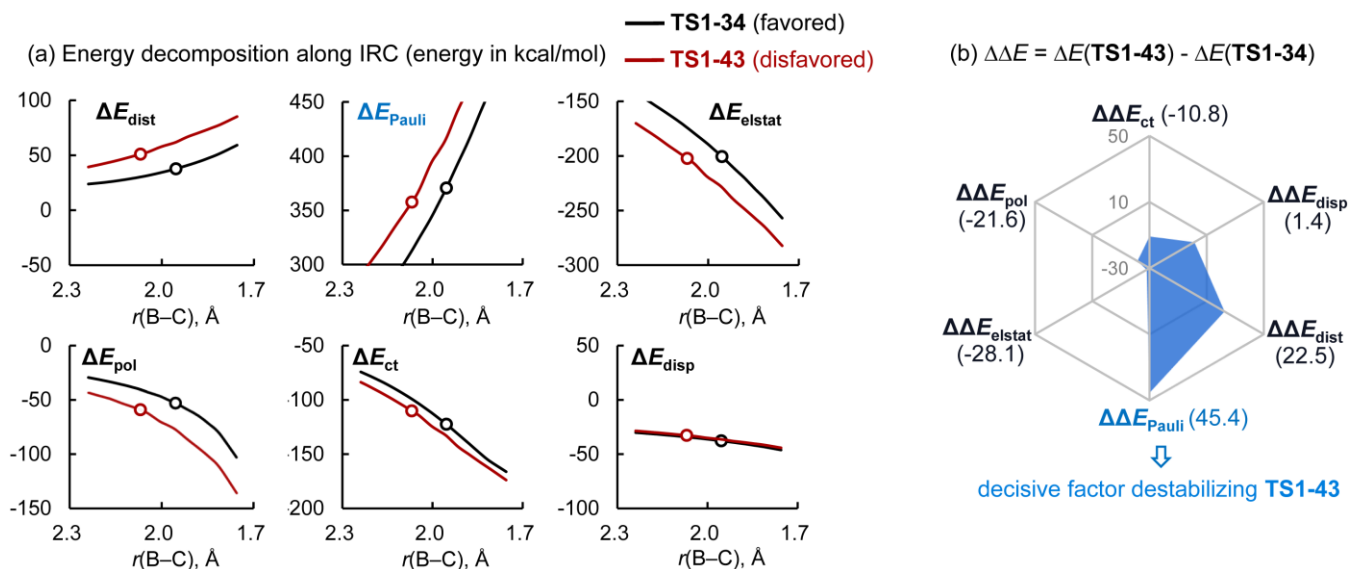

**Fig. S5.** (a) EDA results along IRC for the regioselective transition states (**TS1-34** and **TS1-43**). (b) Comparison of each energy term between **TS1-34** and **TS1-43**.

## Additional Computational Results

### Complexes of PPh<sub>3</sub>Cu-Bpin with 1-phenyl-1,3-butadiene

We computed the structures of PPh<sub>3</sub>Cu-Bpin coordination at different positions of 1-phenyl-1,3-butadiene (Fig. S6). All these structures are less stable than the separated PPh<sub>3</sub>Cu-Bpin and 1-phenyl-1,3-butadiene ( $\Delta G > 8$  kcal/mol), which do not affect the relative barriers of Cu-Bpin addition transition states.

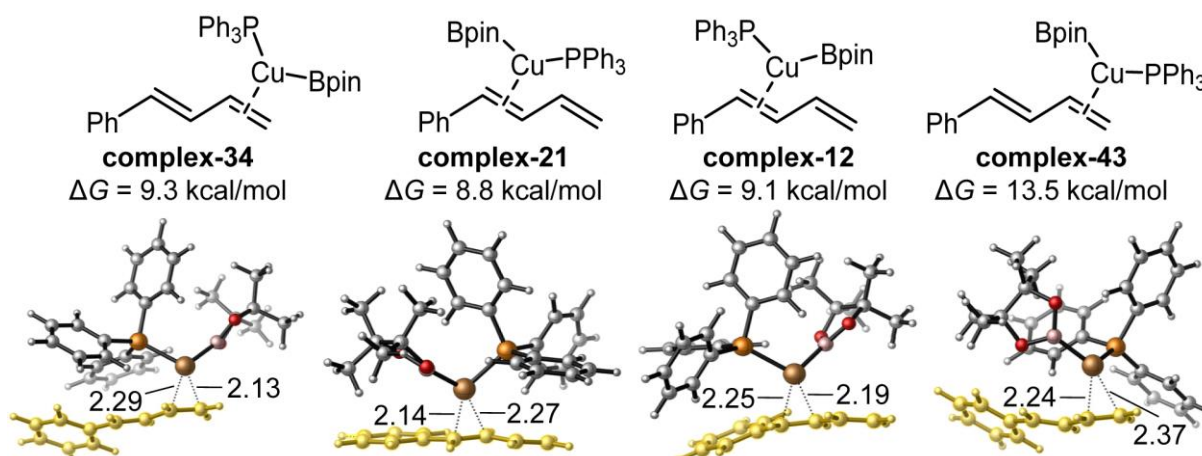

**Fig. S6.** Computed energies of complexes of PPh<sub>3</sub>Cu-Bpin with 1-phenyl-1,3-butadiene.

### Stability difference between cis-5a and trans-5b

As shown in Fig. S7, the more stable cis-5a has much stronger non-covalent interactions than the less stable trans-5b. This is because Bpin is proximal to PhPPh<sub>3</sub>Cu moieties in cis-5a.

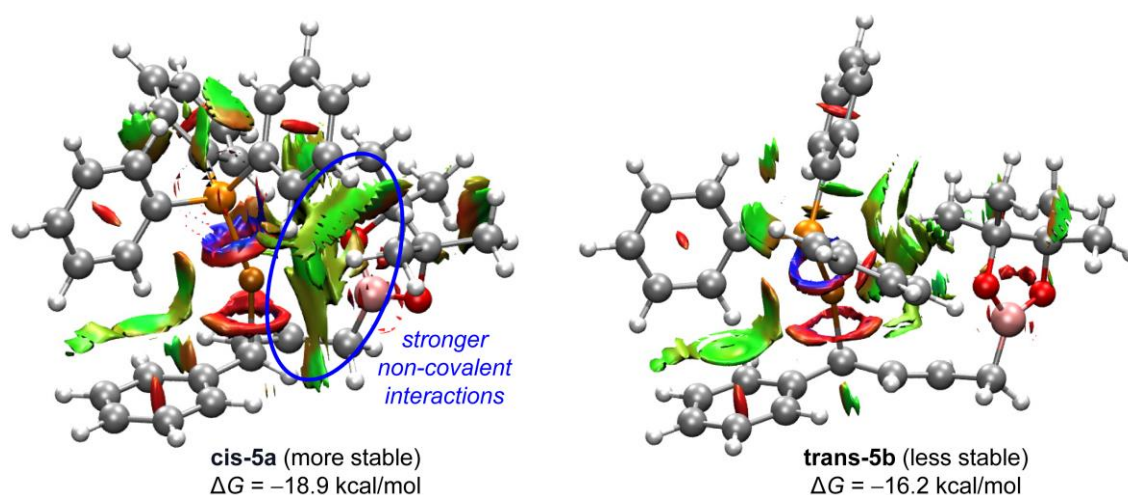

**Fig. S7.** NCI plots of cis-5a and trans-5b

### Comparison of Cu–C protonations in 3a and 5a

The computed transition state of Cu–C(allyl) bond protonation in **3a** requires a barrier of 27.1 kcal/mol (**S-TS8**, Fig. S8), which is much higher than the barrier of protonation of Cu–C(benzyl and allyl) bond in **5a** (**TS3**,  $\Delta G^\ddagger = 17.9$  kcal/mol). The high barrier of **S-TS8** is mostly due to the lack of stabilizing interactions between copper and the double bond.

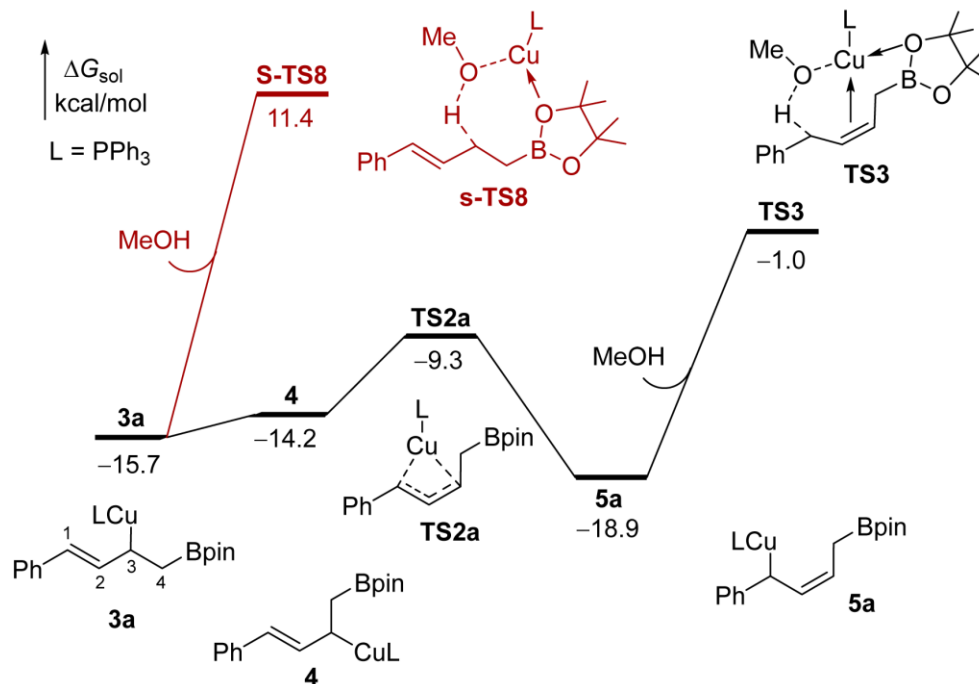

**Fig. S8.** Energy profiles of Cu–C protonations in **3a** and **5a**.

### Comparison of orbital interactions between TS1-34 and TS1-21

Based on the EDA results along IRC for **TS1-34** and **TS1-21** (Fig. 5 in the main text), we found that the difference of Pauli repulsion is the dominant factor affecting the regioselectivity. The effect of charge transfer (i.e., orbital interaction) is a negative contributor. As shown in Fig. S9, the complementary occupied-virtual pairs calculations indicate that the most significant charge transfer is from  $\sigma(\text{Cu-B})$  to  $\pi^*$  orbital. This effect in the disfavored **TS1-21** ( $\Delta E_{\text{ct}} = -68.9$  kcal/mol) is stronger than that in the favored **TS1-34** ( $\Delta E_{\text{ct}} = -60.3$  kcal/mol). This is mainly because the HOMO-LUMO gap in **TS1-21** ( $\Delta E_{\text{gap}} = 2.23$  eV) is smaller than that in **TS1-34** ( $\Delta E_{\text{gap}} = 2.45$  eV).

The prior studies only considered the difference of LUMO orbital coefficients at different carbon positions (20% at the terminal carbon vs 17% at the benzylic carbon) based on the free optimized 1-phenyl-1,3-butadiene. This is not sufficient because the butadiene can be distorted in transition states and these orbital coefficients will change. In **TS1-34** and **TS1-21**, the computed LUMO orbital coefficients of the distorted butadiene are identical between the terminal carbon (28% in blue) and the benzylic carbon (28% in red). Thus, the regioselectivity of Cu-Bpin additions cannot be controlled by the orbital interaction of  $\sigma(\text{Cu-B}) \rightarrow \pi^*$ .

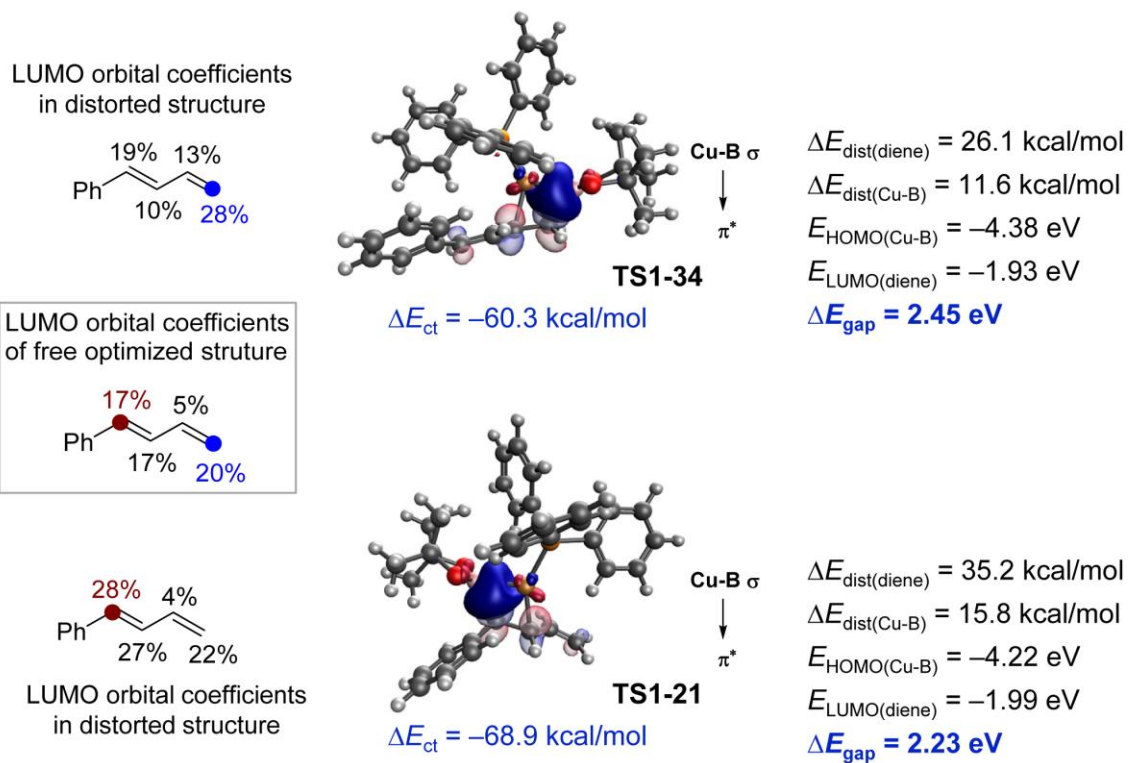

**Fig. S9.** Difference of orbital interactions between **TS1-34** and **TS1-21**.



## Energy Terms of EDA along IRC

**Table S1. EDA energy terms of Cu-B insertion transition states (TS1-34) along IRC**

| Energy terms<br>(in kcal/mol)<br>$r(\text{C-B})$<br>in TS1-34 (in Å) | $\Delta E_{\text{dist}}$ | $\Delta E_{\text{Pauli}}$ | $\Delta E_{\text{ct}}$ | $\Delta E_{\text{elstat}}$ | $\Delta E_{\text{pol}}$ | $\Delta E_{\text{disp}}$ |
|----------------------------------------------------------------------|--------------------------|---------------------------|------------------------|----------------------------|-------------------------|--------------------------|
| 2.24                                                                 | 23.79                    | 246.54                    | -74.28                 | -142.41                    | -29.38                  | -30.15                   |
| 2.20                                                                 | 24.77                    | 258.99                    | -78.57                 | -148.57                    | -31.34                  | -30.88                   |
| 2.17                                                                 | 25.94                    | 272.30                    | -83.43                 | -155.02                    | -33.45                  | -31.70                   |
| 2.13                                                                 | 27.35                    | 286.55                    | -88.86                 | -161.82                    | -35.79                  | -32.56                   |
| 2.07                                                                 | 30.27                    | 312.94                    | -99.21                 | -174.233                   | -40.51                  | -34.20                   |
| 2.06                                                                 | 30.95                    | 318.57                    | -101.48                | -176.84                    | -41.59                  | -34.56                   |
| 2.01                                                                 | 34.02                    | 342.63                    | -111.36                | -187.92                    | -46.39                  | -36.05                   |
| 1.95(TS)                                                             | 37.72                    | 370.59                    | -122.51                | -200.55                    | -52.89                  | -37.77                   |
| 1.92                                                                 | 40.84                    | 393.34                    | -131.38                | -210.84                    | -58.64                  | -39.14                   |
| 1.88                                                                 | 44.23                    | 415.22                    | -140.24                | -220.43                    | -64.60                  | -40.51                   |
| 1.84                                                                 | 47.83                    | 438.54                    | -148.68                | -230.41                    | -72.25                  | -41.96                   |
| 1.81                                                                 | 51.58                    | 460.77                    | -156.17                | -239.62                    | -80.74                  | -43.40                   |
| 1.76                                                                 | 59.21                    | 504.17                    | -166.22                | -256.97                    | -102.85                 | -46.24                   |

**Table S2. EDA energy terms of Cu-B insertion transition states (TS1-21) along IRC**

| Energy terms<br>(in kcal/mol)<br>$r(\text{C-C})$<br>in TS1-21(in Å) | $\Delta E_{\text{dist}}$ | $\Delta E_{\text{Pauli}}$ | $\Delta E_{\text{ct}}$ | $\Delta E_{\text{elstat}}$ | $\Delta E_{\text{pol}}$ | $\Delta E_{\text{disp}}$ |
|---------------------------------------------------------------------|--------------------------|---------------------------|------------------------|----------------------------|-------------------------|--------------------------|
| 2.24                                                                | 32.59                    | 281.64                    | -83.80                 | -163.02                    | -37.67                  | -31.07                   |
| 2.20                                                                | 33.99                    | 294.68                    | -88.37                 | -169.24                    | -40.18                  | -31.90                   |
| 2.17                                                                | 35.62                    | 308.42                    | -93.47                 | -175.69                    | -42.83                  | -32.83                   |
| 2.13                                                                | 37.51                    | 324.78                    | -99.08                 | -183.47                    | -46.51                  | -33.82                   |
| 2.07                                                                | 41.22                    | 351.90                    | -109.50                | -196.01                    | -52.53                  | -35.56                   |
| 2.06                                                                | 42.06                    | 357.62                    | -111.73                | -198.64                    | -53.85                  | -35.94                   |
| 2.00(TS)                                                            | 46.68                    | 388.05                    | -123.75                | -212.39                    | -61.45                  | -37.92                   |
| 1.95                                                                | 50.96                    | 415.87                    | -134.40                | -224.57                    | -69.43                  | -39.70                   |
| 1.92                                                                | 54.45                    | 438.36                    | -142.69                | -234.33                    | -76.44                  | -41.15                   |
| 1.88                                                                | 58.04                    | 461.36                    | -150.68                | -244.16                    | -84.36                  | -42.61                   |
| 1.84                                                                | 61.65                    | 484.64                    | -158.00                | -253.90                    | -93.39                  | -44.07                   |
| 1.81                                                                | 65.16                    | 505.93                    | -164.28                | -262.53                    | -102.57                 | -45.47                   |
| 1.76                                                                | 72.42                    | 550.80                    | -173.81                | -279.640                   | -126.67                 | -48.45                   |

**Table S3. EDA energy terms of Cu-B insertion transition states (TS1-12) along IRC**

| Energy terms<br>(in kcal/mol)<br>$r(\text{C-C})$<br>in TS1-12 (in Å) | $\Delta E_{\text{dist}}$ | $\Delta E_{\text{Pauli}}$ | $\Delta E_{\text{ct}}$ | $\Delta E_{\text{elstat}}$ | $\Delta E_{\text{pol}}$ | $\Delta E_{\text{disp}}$ |
|----------------------------------------------------------------------|--------------------------|---------------------------|------------------------|----------------------------|-------------------------|--------------------------|
| 2.24                                                                 | 31.04                    | 275.35                    | -82.54                 | -157.91                    | -35.33                  | -32.81                   |
| 2.20                                                                 | 32.94                    | 292.78                    | -88.91                 | -166.49                    | -38.41                  | -33.92                   |
| 2.17                                                                 | 34.61                    | 306.91                    | -94.24                 | -173.19                    | -41.20                  | -34.83                   |
| 2.13                                                                 | 36.50                    | 321.65                    | -100.05                | -180.24                    | -44.06                  | -35.76                   |
| 2.07                                                                 | 40.14                    | 347.74                    | -110.66                | -192.50                    | -49.43                  | -37.48                   |
| 2.06(TS)                                                             | 40.95                    | 353.92                    | -112.92                | -195.20                    | -51.14                  | -37.87                   |
| 2.01                                                                 | 45.35                    | 383.54                    | -124.84                | -208.85                    | -58.22                  | -39.80                   |
| 1.95                                                                 | 49.38                    | 409.95                    | -135.31                | -220.72                    | -65.33                  | -41.48                   |
| 1.92                                                                 | 52.63                    | 431.99                    | -143.32                | -230.40                    | -72.17                  | -42.87                   |
| 1.88                                                                 | 55.97                    | 453.94                    | -151.01                | -240.00                    | -79.54                  | -44.22                   |
| 1.84                                                                 | 59.32                    | 475.11                    | -157.96                | -249.05                    | -87.48                  | -45.57                   |
| 1.81                                                                 | 63.66                    | 504.30                    | -165.43                | -261.07                    | -100.65                 | -47.47                   |
| 1.76                                                                 | 70.38                    | 547.53                    | -172.97                | -278.03                    | -125.01                 | -50.30                   |

**Table S4. EDA energy terms of Cu-B insertion transition states (TS1-43) along IRC**

| Energy terms<br>(in kcal/mol)<br>$r(\text{C-C})$<br>in TS1-43 (in Å) | $\Delta E_{\text{dist}}$ | $\Delta E_{\text{Pauli}}$ | $\Delta E_{\text{ct}}$ | $\Delta E_{\text{elstat}}$ | $\Delta E_{\text{pol}}$ | $\Delta E_{\text{disp}}$ |
|----------------------------------------------------------------------|--------------------------|---------------------------|------------------------|----------------------------|-------------------------|--------------------------|
| 2.24                                                                 | 39.34                    | 290.35                    | -83.68                 | -170.09                    | -43.30                  | -28.59                   |
| 2.20                                                                 | 41.43                    | 303.47                    | -88.60                 | -176.47                    | -46.15                  | -29.39                   |
| 2.17                                                                 | 43.75                    | 317.00                    | -93.96                 | -183.14                    | -48.95                  | -30.23                   |
| 2.13                                                                 | 46.30                    | 332.60                    | -99.73                 | -190.52                    | -52.95                  | -31.17                   |
| 2.07(TS)                                                             | 51.02                    | 357.59                    | -110.15                | -202.21                    | -59.11                  | -32.76                   |
| 2.06                                                                 | 52.03                    | 363.73                    | -112.34                | -205.13                    | -60.88                  | -33.10                   |
| 2.00                                                                 | 57.36                    | 393.00                    | -123.66                | -218.28                    | -69.78                  | -34.90                   |
| 1.96                                                                 | 61.95                    | 416.82                    | -133.18                | -228.80                    | -77.42                  | -36.37                   |
| 1.91                                                                 | 66.79                    | 442.35                    | -142.98                | -239.90                    | -86.27                  | -37.93                   |
| 1.88                                                                 | 70.50                    | 463.26                    | -150.20                | -248.72                    | -94.43                  | -39.17                   |
| 1.84                                                                 | 74.19                    | 483.50                    | -157.02                | -257.21                    | -102.73                 | -40.36                   |
| 1.81                                                                 | 77.76                    | 504.11                    | -163.18                | -265.56                    | -112.09                 | -41.58                   |
| 1.75                                                                 | 85.16                    | 548.33                    | -173.87                | -282.23                    | -135.80                 | -44.21                   |

## Cartesian Coordinates (Å) and Energies of the Optimized Structures

MeOH

B3LYP-D3 SCF energy: -115.71332581 a.u.  
B3LYP-D3 enthalpy: -115.657666 a.u.  
B3LYP-D3 free energy: -115.684613 a.u.  
wB97XD SCF energy in solution: -115.73075039 a.u.  
wB97XD enthalpy in solution: -115.675091 a.u.  
wB97XD free energy in solution: -115.702038 a.u.  
Three lowest frequencies (cm<sup>-1</sup>): 350.3507 1067.6046 1100.6272

Cartesian coordinates

| ATOM | X         | Y         | Z         |
|------|-----------|-----------|-----------|
| C    | 0.662272  | -0.019658 | 0.000000  |
| H    | 1.080094  | 0.991243  | -0.000001 |
| H    | 1.039140  | -0.543472 | -0.893373 |
| H    | 1.039140  | -0.543470 | 0.893374  |
| O    | -0.749312 | 0.122356  | 0.000000  |
| H    | -1.137514 | -0.765201 | 0.000000  |

CO<sub>2</sub>

B3LYP-D3 SCF energy: -188.57776042 a.u.  
B3LYP-D3 enthalpy: -188.562560 a.u.  
B3LYP-D3 free energy: -188.586861 a.u.  
wB97XD SCF energy in solution: -188.58292474 a.u.  
wB97XD enthalpy in solution: -188.567724 a.u.  
wB97XD free energy in solution: -188.592025 a.u.  
Three lowest frequencies (cm<sup>-1</sup>): 647.2717 647.2717 1369.4400

Cartesian coordinates

| ATOM | X        | Y        | Z         |
|------|----------|----------|-----------|
| C    | 0.000000 | 0.000000 | 0.000000  |
| O    | 0.000000 | 0.000000 | 1.169724  |
| O    | 0.000000 | 0.000000 | -1.169724 |

CO

B3LYP-D3 SCF energy: -113.30691453 a.u.  
B3LYP-D3 enthalpy: -113.298574 a.u.  
B3LYP-D3 free energy: -113.321017 a.u.  
wB97XD SCF energy in solution: -113.30444483 a.u.  
wB97XD enthalpy in solution: -113.296103 a.u.  
wB97XD free energy in solution: -113.318546 a.u.  
The frequency (cm<sup>-1</sup>): 2210.57

Cartesian coordinates

| ATOM | X        | Y        | Z           |
|------|----------|----------|-------------|
| O    | 0.000000 | 0.000000 | 0.48760300  |
| C    | 0.000000 | 0.000000 | -0.65013800 |

B<sub>2</sub>pin<sub>2</sub>

B3LYP-D3 SCF energy: -822.57841770 a.u.  
 B3LYP-D3 enthalpy: -822.191368 a.u.  
 B3LYP-D3 free energy: -822.258170 a.u.  
 wB97XD SCF energy in solution: -822.55189622 a.u.  
 wB97XD enthalpy in solution: -822.164846 a.u.  
 wB97XD free energy in solution: -822.231648 a.u.  
 Three lowest frequencies (cm-1): 30.83 39.74 43.54

Cartesian coordinates

| ATOM | X         | Y         | Z         |
|------|-----------|-----------|-----------|
| B    | -0.851045 | -0.000367 | 0.000237  |
| C    | -2.997835 | -0.651567 | 0.438515  |
| C    | -3.257303 | -1.927915 | -0.371882 |
| H    | -4.298986 | -1.989992 | -0.704078 |
| H    | -3.039089 | -2.796678 | 0.256534  |
| H    | -2.605456 | -1.973257 | -1.249812 |
| C    | -2.997485 | 0.651638  | -0.438592 |
| C    | -3.256660 | 1.928089  | 0.371755  |
| H    | -4.298411 | 1.990545  | 0.703683  |
| H    | -3.037961 | 2.796777  | -0.256599 |
| H    | -2.605055 | 1.973219  | 1.249874  |
| C    | -3.904674 | 0.609998  | -1.665001 |
| H    | -3.816865 | 1.550134  | -2.218591 |
| H    | -4.952129 | 0.484019  | -1.367405 |
| H    | -3.630521 | -0.204527 | -2.338662 |
| C    | -3.905246 | -0.609527 | 1.664742  |
| H    | -3.630816 | 0.204832  | 2.338491  |
| H    | -3.818028 | -1.549732 | 2.218314  |
| H    | -4.952580 | -0.482996 | 1.366943  |
| O    | -1.613419 | 0.720825  | -0.888565 |
| O    | -1.613884 | -0.721314 | 0.888794  |
| B    | 0.851040  | -0.000371 | 0.000160  |
| C    | 2.997728  | -0.651599 | -0.438540 |
| C    | 3.257291  | -1.927978 | 0.371784  |
| H    | 4.299036  | -1.990117 | 0.703765  |
| H    | 3.038910  | -2.796723 | -0.256604 |
| H    | 2.605616  | -1.973305 | 1.249840  |
| C    | 2.997589  | 0.651605  | 0.438569  |
| C    | 3.256705  | 1.928024  | -0.371837 |
| H    | 4.298386  | 1.990374  | -0.704007 |
| H    | 3.038230  | 2.796725  | 0.256572  |
| H    | 2.604908  | 1.973225  | -1.249811 |
| C    | 3.904977  | 0.609938  | 1.664833  |
| H    | 3.817387  | 1.550127  | 2.218369  |
| H    | 4.952366  | 0.483804  | 1.367065  |
| H    | 3.630838  | -0.204500 | 2.338605  |
| C    | 3.904923  | -0.609560 | -1.664931 |
| H    | 3.630482  | 0.204909  | -2.338545 |
| H    | 3.817455  | -1.549694 | -2.218582 |
| H    | 4.952334  | -0.483217 | -1.367326 |
| O    | 1.613587  | 0.720873  | 0.888776  |
| O    | 1.613706  | -0.721275 | -0.888569 |

B3LYP-D3 SCF energy: -1643.78356024 a.u.  
 B3LYP-D3 enthalpy: -1643.295411 a.u.  
 B3LYP-D3 free energy: -1643.389688 a.u.  
 wB97XD SCF energy in solution: -1644.91698047 a.u.  
 wB97XD enthalpy in solution: -1644.428831 a.u.  
 wB97XD free energy in solution: -1644.523108 a.u.  
 Three lowest frequencies (cm-1): 12.5051 13.1051 15.3371

Cartesian coordinates

| ATOM | X         | Y         | Z         |
|------|-----------|-----------|-----------|
| Cu   | 0.841424  | -0.037048 | -0.031764 |
| B    | 2.845353  | -0.028934 | -0.025770 |
| C    | 5.024862  | -0.793955 | 0.030351  |
| C    | 5.938969  | -1.381540 | 1.103302  |
| H    | 6.985290  | -1.111025 | 0.916163  |
| H    | 5.862043  | -2.473869 | 1.094344  |
| H    | 5.660107  | -1.033898 | 2.100623  |
| C    | 5.013087  | 0.770433  | -0.052986 |
| C    | 5.932521  | 1.372610  | -1.113226 |
| H    | 6.980180  | 1.117608  | -0.912294 |
| H    | 5.839149  | 2.463663  | -1.104625 |
| H    | 5.672145  | 1.021797  | -2.114424 |
| C    | 5.257559  | 1.448855  | 1.302561  |
| H    | 5.025537  | 2.514578  | 1.210552  |
| H    | 6.298234  | 1.345128  | 1.629689  |
| H    | 4.602351  | 1.024964  | 2.069654  |
| C    | 5.299254  | -1.467718 | -1.321766 |
| H    | 4.647749  | -1.054012 | -2.097519 |
| H    | 5.083736  | -2.537183 | -1.233411 |
| H    | 6.342425  | -1.346098 | -1.634475 |
| O    | 3.635729  | 1.047770  | -0.417383 |
| O    | 3.647233  | -1.093247 | 0.375700  |
| P    | -1.490845 | -0.009542 | -0.004139 |
| C    | -2.243121 | -1.496643 | 0.761121  |
| C    | -3.508643 | -1.991793 | 0.412470  |
| H    | -4.086250 | -1.503967 | -0.367513 |
| C    | -4.021935 | -3.118086 | 1.057587  |
| H    | -5.001941 | -3.497935 | 0.781345  |
| C    | -3.276863 | -3.758904 | 2.050939  |
| H    | -3.677986 | -4.637571 | 2.548774  |
| C    | -2.175182 | 1.411930  | 0.930745  |
| C    | -1.431382 | 2.602968  | 0.910554  |
| H    | -0.480052 | 2.632490  | 0.383419  |
| C    | -1.901331 | 3.737487  | 1.572242  |
| H    | -1.318947 | 4.654411  | 1.551240  |
| C    | -3.110476 | 3.688305  | 2.270360  |
| H    | -3.473435 | 4.569749  | 2.792002  |
| C    | -3.847259 | 2.501867  | 2.307960  |
| H    | -4.782878 | 2.458810  | 2.859143  |
| C    | -3.383257 | 1.365903  | 1.642109  |
| H    | -3.954736 | 0.443071  | 1.683074  |
| C    | -2.255664 | 0.104969  | -1.666956 |
| C    | -3.483021 | 0.737506  | -1.914755 |
| H    | -4.018199 | 1.221361  | -1.102635 |
| C    | -4.012568 | 0.756593  | -3.206186 |
| H    | -4.963157 | 1.249511  | -3.391728 |

|   |           |           |           |
|---|-----------|-----------|-----------|
| C | -3.321500 | 0.149462  | -4.257829 |
| H | -3.735193 | 0.168984  | -5.262438 |
| C | -2.092876 | -0.471428 | -4.019753 |
| H | -1.546023 | -0.932739 | -4.837395 |
| C | -1.558499 | -0.488530 | -2.731283 |
| H | -0.592557 | -0.953441 | -2.545547 |
| C | -2.011588 | -3.277284 | 2.395114  |
| H | -1.423493 | -3.780759 | 3.157329  |
| C | -1.493351 | -2.154388 | 1.749361  |
| H | -0.499586 | -1.789350 | 2.000011  |

1

B3LYP-D3 SCF energy: -387.05859240 a.u.  
 B3LYP-D3 enthalpy: -386.881154 a.u.  
 B3LYP-D3 free energy: -386.925771 a.u.  
 wB97XD SCF energy in solution: -387.02911182 a.u.  
 wB97XD enthalpy in solution: -386.851673 a.u.  
 wB97XD free energy in solution: -386.896290 a.u.  
 Three lowest frequencies (cm-1): 38.0052 115.5030 122.2993

Cartesian coordinates

| ATOM | X         | Y         | Z         |
|------|-----------|-----------|-----------|
| C    | 2.294014  | 1.395567  | 0.000000  |
| C    | 0.940001  | 1.075164  | 0.000002  |
| C    | 0.513331  | -0.268447 | 0.000005  |
| C    | 1.502173  | -1.270946 | 0.000000  |
| C    | 2.858746  | -0.950692 | -0.000008 |
| C    | 3.262194  | 0.385615  | -0.000002 |
| H    | 2.598252  | 2.439072  | 0.000006  |
| H    | 0.206725  | 1.876183  | 0.000010  |
| H    | 1.195891  | -2.314731 | -0.000001 |
| H    | 3.600330  | -1.745187 | -0.000009 |
| H    | 4.318510  | 0.640132  | -0.000002 |
| C    | -0.896077 | -0.665665 | 0.000008  |
| C    | -1.980822 | 0.139555  | 0.000005  |
| H    | -1.069153 | -1.742823 | 0.000001  |
| H    | -1.861303 | 1.222552  | 0.000001  |
| C    | -3.345717 | -0.352624 | 0.000002  |
| C    | -4.435473 | 0.433083  | -0.000009 |
| H    | -3.470090 | -1.436278 | 0.000009  |
| H    | -5.439252 | 0.019361  | -0.000011 |
| H    | -4.354128 | 1.518059  | -0.000016 |

TS1-34

B3LYP-D3 SCF energy: -2030.85154646 a.u.  
 B3LYP-D3 enthalpy: -2030.185680 a.u.  
 B3LYP-D3 free energy: -2030.297702 a.u.  
 wB97XD SCF energy in solution: -2031.94601209 a.u.  
 wB97XD enthalpy in solution: -2031.280146 a.u.  
 wB97XD free energy in solution: -2031.392168 a.u.  
 Three lowest frequencies (cm-1): -280.6754 10.8142 21.5879  
 Imaginary frequency: -280.6754 cm-1

Cartesian coordinates

| ATOM | X         | Y         | Z         |
|------|-----------|-----------|-----------|
| C    | -4.653459 | -1.861414 | 1.725057  |
| C    | -3.591331 | -1.976290 | 0.833975  |
| C    | -3.808221 | -2.241370 | -0.540969 |
| C    | -5.154229 | -2.352479 | -0.963075 |
| C    | -6.214930 | -2.228168 | -0.069461 |
| C    | -5.976448 | -1.986139 | 1.286740  |
| H    | -4.443214 | -1.651762 | 2.771574  |
| H    | -2.580666 | -1.828384 | 1.203591  |
| H    | -5.357200 | -2.546935 | -2.014683 |
| H    | -7.235790 | -2.322553 | -0.433741 |
| H    | -6.803168 | -1.886888 | 1.985138  |
| C    | -2.734509 | -2.332817 | -1.515577 |
| C    | -1.395288 | -2.386848 | -1.231122 |
| H    | -3.032652 | -2.277125 | -2.563593 |
| H    | -1.110154 | -2.530904 | -0.184585 |
| C    | -0.300799 | -2.212323 | -2.134509 |
| C    | 1.102770  | -2.480446 | -1.729743 |
| H    | -0.505985 | -2.082848 | -3.194863 |
| H    | 1.767169  | -2.658263 | -2.575590 |
| H    | 1.213880  | -3.250095 | -0.961442 |
| Cu   | 0.577926  | -0.542375 | -1.236779 |
| B    | 2.431287  | -1.434424 | -0.749631 |
| C    | 4.687217  | -1.138928 | -0.465706 |
| C    | 5.944627  | -1.694348 | -1.127103 |
| H    | 6.762784  | -1.767400 | -0.401149 |
| H    | 6.262686  | -1.026442 | -1.933998 |
| H    | 5.768527  | -2.682408 | -1.557778 |
| C    | 4.111382  | -2.010574 | 0.707417  |
| C    | 4.524555  | -1.570165 | 2.107596  |
| H    | 5.612350  | -1.630015 | 2.228393  |
| H    | 4.062405  | -2.227273 | 2.851376  |
| H    | 4.203629  | -0.546933 | 2.314827  |
| C    | 4.355752  | -3.512225 | 0.520547  |
| H    | 3.755288  | -4.062784 | 1.251173  |
| H    | 5.409052  | -3.773047 | 0.668113  |
| H    | 4.053744  | -3.836402 | -0.480462 |
| C    | 4.890031  | 0.330029  | -0.078124 |
| H    | 3.995831  | 0.738606  | 0.399812  |
| H    | 5.081366  | 0.912105  | -0.985082 |
| H    | 5.741277  | 0.454391  | 0.599432  |
| O    | 2.674860  | -1.803641 | 0.562930  |
| O    | 3.599724  | -1.174953 | -1.437786 |
| P    | -0.159591 | 1.255905  | -0.188823 |
| C    | -0.754195 | 0.679526  | 1.452906  |
| C    | -1.948623 | 1.143079  | 2.021401  |
| H    | -2.552480 | 1.877082  | 1.497686  |
| C    | -2.383494 | 0.634155  | 3.246220  |
| H    | -3.317472 | 0.988119  | 3.673360  |
| C    | -1.634876 | -0.341701 | 3.906939  |
| H    | -1.983451 | -0.746084 | 4.853406  |
| C    | 1.044833  | 2.590349  | 0.150043  |
| C    | 2.204713  | 2.645003  | -0.634774 |
| H    | 2.373161  | 1.879853  | -1.389210 |

|   |           |           |           |
|---|-----------|-----------|-----------|
| C | 3.150546  | 3.649544  | -0.422838 |
| H | 4.049128  | 3.682691  | -1.032570 |
| C | 2.947069  | 4.597838  | 0.581862  |
| H | 3.685983  | 5.376160  | 0.752247  |
| C | 1.798968  | 4.539896  | 1.377945  |
| H | 1.646171  | 5.270709  | 2.167443  |
| C | 0.849727  | 3.539991  | 1.165161  |
| H | -0.036373 | 3.487554  | 1.792097  |
| C | -1.632349 | 2.046056  | -0.935993 |
| C | -1.827656 | 3.430024  | -1.031255 |
| H | -1.059176 | 4.117814  | -0.691636 |
| C | -3.018878 | 3.926613  | -1.567361 |
| H | -3.166366 | 5.000584  | -1.645313 |
| C | -4.018660 | 3.049381  | -1.993572 |
| H | -4.947533 | 3.441837  | -2.398901 |
| C | -3.823640 | 1.667915  | -1.900467 |
| H | -4.597228 | 0.975716  | -2.220633 |
| C | -2.630040 | 1.164597  | -1.387256 |
| H | -2.477854 | 0.089885  | -1.329173 |
| C | -0.443817 | -0.807221 | 3.342852  |
| H | 0.137501  | -1.573657 | 3.848135  |
| C | -0.001751 | -0.302472 | 2.119826  |
| H | 0.915751  | -0.682140 | 1.677030  |

TS1-21

B3LYP-D3 SCF energy: -2030.84168449 a.u.  
 B3LYP-D3 enthalpy: -2030.175896 a.u.  
 B3LYP-D3 free energy: -2030.286131 a.u.  
 wB97XD SCF energy in solution: -2031.93618107 a.u.  
 wB97XD enthalpy in solution: -2031.270393 a.u.  
 wB97XD free energy in solution: -2031.380628 a.u.  
 Three lowest frequencies (cm<sup>-1</sup>): -260.8216 12.3976 21.9115  
 Imaginary frequency: -260.8216 cm<sup>-1</sup>

Cartesian coordinates

| ATOM | X         | Y         | Z         |
|------|-----------|-----------|-----------|
| C    | -4.112060 | -2.055969 | 2.229395  |
| C    | -2.996324 | -1.974995 | 1.401610  |
| C    | -3.140473 | -1.871071 | 0.008845  |
| C    | -4.433603 | -1.844938 | -0.529529 |
| C    | -5.556006 | -1.920419 | 0.300184  |
| C    | -5.399931 | -2.024731 | 1.682610  |
| H    | -3.979979 | -2.132308 | 3.305748  |
| H    | -1.996002 | -1.966086 | 1.827187  |
| H    | -4.560494 | -1.764670 | -1.606505 |
| H    | -6.550940 | -1.899994 | -0.137495 |
| H    | -6.271001 | -2.081474 | 2.329944  |
| C    | -1.940661 | -1.785569 | -0.890477 |
| C    | -0.927615 | -2.889445 | -0.722641 |
| H    | -2.222410 | -1.635112 | -1.934917 |
| H    | -1.076230 | -3.545934 | 0.132168  |
| C    | -0.272825 | -3.450802 | -1.887876 |
| C    | 0.411973  | -4.614449 | -1.980960 |
| H    | -0.326462 | -2.830595 | -2.789306 |



|    |           |           |           |
|----|-----------|-----------|-----------|
| H  | 0.881389  | -4.921252 | -2.910421 |
| H  | 0.500738  | -5.291792 | -1.133574 |
| Cu | -0.039733 | -1.113687 | -0.341405 |
| B  | -1.699010 | 0.183429  | -0.635782 |
| C  | -2.506759 | 2.163845  | 0.220179  |
| C  | -3.712864 | 2.476946  | 1.102607  |
| H  | -4.139978 | 3.454156  | 0.849241  |
| H  | -3.399148 | 2.503101  | 2.151170  |
| H  | -4.486432 | 1.712573  | 1.004208  |
| C  | -2.818439 | 2.070052  | -1.324481 |
| C  | -2.391885 | 3.287320  | -2.140016 |
| H  | -2.934901 | 4.181846  | -1.813884 |
| H  | -2.620437 | 3.116609  | -3.197100 |
| H  | -1.319958 | 3.473656  | -2.049871 |
| C  | -4.273516 | 1.703076  | -1.633919 |
| H  | -4.362782 | 1.484876  | -2.702883 |
| H  | -4.955586 | 2.524285  | -1.389324 |
| H  | -4.581780 | 0.812185  | -1.080075 |
| C  | -1.342461 | 3.102664  | 0.557931  |
| H  | -0.457484 | 2.873714  | -0.040106 |
| H  | -1.076251 | 2.974409  | 1.611882  |
| H  | -1.614070 | 4.151227  | 0.396645  |
| O  | -2.007359 | 0.930370  | -1.748699 |
| O  | -2.067836 | 0.811276  | 0.537050  |
| P  | 1.820790  | -0.047770 | 0.113044  |
| C  | 3.332059  | -0.951519 | -0.396047 |
| C  | 3.194693  | -2.312797 | -0.712938 |
| H  | 2.213670  | -2.783663 | -0.687386 |
| C  | 4.314832  | -3.053944 | -1.095335 |
| H  | 4.196900  | -4.103599 | -1.348814 |
| C  | 5.569376  | -2.445672 | -1.166570 |
| H  | 6.438808  | -3.024524 | -1.467011 |
| C  | 1.986405  | 1.621207  | -0.639334 |
| C  | 1.347821  | 1.845322  | -1.868455 |
| H  | 0.747720  | 1.056444  | -2.314146 |
| C  | 1.436279  | 3.091545  | -2.489551 |
| H  | 0.938605  | 3.254708  | -3.441402 |
| C  | 2.142632  | 4.130620  | -1.877205 |
| H  | 2.199557  | 5.105053  | -2.354668 |
| C  | 2.762729  | 3.919389  | -0.643348 |
| H  | 3.300778  | 4.729283  | -0.158023 |
| C  | 2.688717  | 2.669073  | -0.026253 |
| H  | 3.159533  | 2.514553  | 0.940731  |
| C  | 1.939766  | 0.247617  | 1.918811  |
| C  | 3.139008  | 0.172997  | 2.639954  |
| H  | 4.061425  | -0.101448 | 2.137165  |
| C  | 3.147034  | 0.439157  | 4.011357  |
| H  | 4.079460  | 0.376387  | 4.566014  |
| C  | 1.962682  | 0.778560  | 4.668519  |
| H  | 1.972812  | 0.982708  | 5.735826  |
| C  | 0.763189  | 0.845344  | 3.953932  |
| H  | -0.162897 | 1.098770  | 4.463010  |
| C  | 0.746300  | 0.577124  | 2.585582  |
| H  | -0.188685 | 0.620598  | 2.031381  |
| C  | 5.706664  | -1.086144 | -0.868878 |
| H  | 6.679990  | -0.607787 | -0.938904 |

|   |          |           |           |
|---|----------|-----------|-----------|
| C | 4.591827 | -0.337950 | -0.491705 |
| H | 4.698145 | 0.723607  | -0.285324 |

TS1-12

B3LYP-D3 SCF energy: -2030.84418570 a.u.  
 B3LYP-D3 enthalpy: -2030.178387 a.u.  
 B3LYP-D3 free energy: -2030.288866 a.u.  
 wB97XD SCF energy in solution: -2031.93479739 a.u.  
 wB97XD enthalpy in solution: -2031.268999 a.u.  
 wB97XD free energy in solution: -2031.379478 a.u.  
 Three lowest frequencies (cm-1): -234.6069 14.5951 18.5740  
 Imaginary frequency: -234.6069 cm-1

Cartesian coordinates

| ATOM | X         | Y         | Z         |
|------|-----------|-----------|-----------|
| C    | -2.133558 | -3.325004 | 1.813407  |
| C    | -1.058393 | -3.102269 | 0.951878  |
| C    | -1.202874 | -3.229441 | -0.460351 |
| C    | -2.475624 | -3.654805 | -0.930347 |
| C    | -3.531392 | -3.891218 | -0.061446 |
| C    | -3.381490 | -3.714801 | 1.323754  |
| H    | -1.986788 | -3.195108 | 2.883541  |
| H    | -0.100840 | -2.805217 | 1.373084  |
| H    | -2.620234 | -3.770948 | -2.002332 |
| H    | -4.489234 | -4.214524 | -0.464674 |
| H    | -4.213071 | -3.893303 | 1.999217  |
| C    | -0.150563 | -2.866965 | -1.387511 |
| C    | 1.246289  | -2.653966 | -0.930572 |
| H    | -0.310335 | -3.051934 | -2.445377 |
| H    | 1.506949  | -3.185908 | -0.011621 |
| C    | 2.277224  | -2.816179 | -1.991581 |
| C    | 3.381082  | -3.560443 | -1.867686 |
| H    | 2.073268  | -2.295718 | -2.926669 |
| H    | 4.086210  | -3.673638 | -2.686472 |
| H    | 3.608963  | -4.090047 | -0.945167 |
| Cu   | 0.055285  | -0.937080 | -0.712667 |
| B    | 2.068752  | -0.936103 | -0.149919 |
| C    | 3.772922  | 0.592221  | -0.087632 |
| C    | 5.046450  | 0.812596  | -0.898299 |
| H    | 5.836440  | 1.244530  | -0.272917 |
| H    | 4.840304  | 1.509028  | -1.717467 |
| H    | 5.410596  | -0.121015 | -1.332173 |
| C    | 3.913835  | -0.417272 | 1.113391  |
| C    | 4.090005  | 0.230401  | 2.483490  |
| H    | 5.016564  | 0.814703  | 2.520804  |
| H    | 4.145692  | -0.547414 | 3.251907  |
| H    | 3.252422  | 0.888487  | 2.726955  |
| C    | 4.978949  | -1.492393 | 0.882289  |
| H    | 4.888845  | -2.254149 | 1.663092  |
| H    | 5.989801  | -1.072717 | 0.920741  |
| H    | 4.834113  | -1.979955 | -0.086129 |
| C    | 3.158181  | 1.939167  | 0.313782  |
| H    | 2.231068  | 1.799654  | 0.876375  |
| H    | 2.912280  | 2.502913  | -0.590236 |

|   |           |           |           |
|---|-----------|-----------|-----------|
| H | 3.852011  | 2.531112  | 0.920303  |
| O | 2.621556  | -1.102983 | 1.100201  |
| O | 2.800435  | -0.077361 | -0.943106 |
| P | -1.040371 | 0.911269  | -0.195120 |
| C | -1.039312 | 1.282628  | 1.606862  |
| C | -2.028387 | 2.081880  | 2.201324  |
| H | -2.850536 | 2.463535  | 1.602463  |
| C | -1.969347 | 2.374314  | 3.564660  |
| H | -2.740195 | 2.992637  | 4.016871  |
| C | -0.929547 | 1.865825  | 4.347566  |
| H | -0.888741 | 2.091389  | 5.409871  |
| C | -0.274169 | 2.377205  | -0.989426 |
| C | 0.438015  | 2.168347  | -2.180524 |
| H | 0.516151  | 1.164097  | -2.588593 |
| C | 1.069353  | 3.233821  | -2.821696 |
| H | 1.621655  | 3.059340  | -3.740872 |
| C | 1.005580  | 4.516648  | -2.271528 |
| H | 1.505449  | 5.345874  | -2.764927 |
| C | 0.307013  | 4.730630  | -1.080737 |
| H | 0.262898  | 5.725544  | -0.645923 |
| C | -0.331326 | 3.666770  | -0.440796 |
| H | -0.857335 | 3.837574  | 0.493725  |
| C | -2.817005 | 0.932815  | -0.639023 |
| C | -3.481578 | 2.057324  | -1.147882 |
| H | -2.936922 | 2.981349  | -1.320706 |
| C | -4.845591 | 1.985493  | -1.440701 |
| H | -5.357640 | 2.857618  | -1.838951 |
| C | -5.548685 | 0.797525  | -1.225241 |
| H | -6.609452 | 0.745946  | -1.456215 |
| C | -4.885952 | -0.325674 | -0.722046 |
| H | -5.419253 | -1.258064 | -0.560280 |
| C | -3.523696 | -0.263724 | -0.434395 |
| H | -3.011511 | -1.145467 | -0.062150 |
| C | 0.046999  | 1.055374  | 3.764869  |
| H | 0.848978  | 0.641427  | 4.370317  |
| C | -0.008070 | 0.759332  | 2.401774  |
| H | 0.742032  | 0.110972  | 1.959812  |

TS1-43

B3LYP-D3 SCF energy: -2030.83588471 a.u.  
 B3LYP-D3 enthalpy: -2030.169779 a.u.  
 B3LYP-D3 free energy: -2030.280802 a.u.  
 wB97XD SCF energy in solution: -2031.92895998 a.u.  
 wB97XD enthalpy in solution: -2031.262854 a.u.  
 wB97XD free energy in solution: -2031.373877 a.u.  
 Three lowest frequencies (cm<sup>-1</sup>): -276.6899 9.3234 19.1169  
 Imaginary frequency: -276.6899 cm<sup>-1</sup>

Cartesian coordinates

| ATOM | X        | Y        | Z         |
|------|----------|----------|-----------|
| C    | 6.680679 | 1.497257 | 1.676524  |
| C    | 5.445903 | 1.468243 | 1.034183  |
| C    | 5.359145 | 1.308177 | -0.363347 |
| C    | 6.559259 | 1.155562 | -1.081593 |

|    |           |           |           |
|----|-----------|-----------|-----------|
| C  | 7.796427  | 1.182301  | -0.438723 |
| C  | 7.864521  | 1.356803  | 0.944703  |
| H  | 6.720942  | 1.619886  | 2.756047  |
| H  | 4.535990  | 1.549539  | 1.621692  |
| H  | 6.515141  | 1.020835  | -2.160203 |
| H  | 8.708020  | 1.065656  | -1.019395 |
| H  | 8.826626  | 1.375193  | 1.449525  |
| C  | 4.079346  | 1.260562  | -1.079778 |
| C  | 2.876831  | 1.624300  | -0.598957 |
| H  | 4.127995  | 0.879929  | -2.101137 |
| H  | 2.786000  | 2.038532  | 0.403275  |
| C  | 1.609962  | 1.533875  | -1.360576 |
| C  | 0.736313  | 2.748816  | -1.387500 |
| H  | 1.731440  | 1.054743  | -2.335264 |
| H  | 0.447727  | 3.083662  | -2.382403 |
| H  | 1.047058  | 3.560883  | -0.729795 |
| Cu | -0.313560 | 1.263416  | -0.568409 |
| B  | 1.152335  | -0.289326 | -0.492854 |
| C  | 2.200593  | -1.999240 | 0.637769  |
| C  | 3.714686  | -1.823365 | 0.491594  |
| H  | 4.226700  | -2.791879 | 0.487610  |
| H  | 4.092019  | -1.233196 | 1.331528  |
| H  | 3.969018  | -1.285851 | -0.423317 |
| C  | 1.507885  | -2.550123 | -0.661264 |
| C  | 0.162667  | -3.233246 | -0.383707 |
| H  | 0.300839  | -4.195136 | 0.121104  |
| H  | -0.352230 | -3.412254 | -1.332627 |
| H  | -0.482111 | -2.603666 | 0.235473  |
| C  | 2.385488  | -3.444584 | -1.531360 |
| H  | 1.823917  | -3.762025 | -2.416024 |
| H  | 2.690692  | -4.341431 | -0.979919 |
| H  | 3.281057  | -2.919186 | -1.869276 |
| C  | 1.886455  | -2.776340 | 1.912467  |
| H  | 0.816749  | -2.793290 | 2.125087  |
| H  | 2.393981  | -2.305240 | 2.760966  |
| H  | 2.248271  | -3.808061 | 1.831323  |
| O  | 1.221124  | -1.327138 | -1.405105 |
| O  | 1.614771  | -0.663260 | 0.752936  |
| P  | -2.277741 | 0.465365  | 0.050752  |
| C  | -3.517982 | 1.724625  | 0.559542  |
| C  | -4.607560 | 1.442386  | 1.397983  |
| H  | -4.733893 | 0.446989  | 1.813802  |
| C  | -5.526373 | 2.445030  | 1.712215  |
| H  | -6.366245 | 2.221488  | 2.364804  |
| C  | -5.364129 | 3.732956  | 1.194876  |
| H  | -6.079679 | 4.511991  | 1.444416  |
| C  | -3.046695 | -0.428511 | -1.359048 |
| C  | -2.190530 | -1.117274 | -2.234823 |
| H  | -1.115832 | -1.089257 | -2.076005 |
| C  | -2.718654 | -1.839490 | -3.305138 |
| H  | -2.048641 | -2.367987 | -3.977983 |
| C  | -4.099298 | -1.875275 | -3.516223 |
| H  | -4.508278 | -2.434463 | -4.353513 |
| C  | -4.953181 | -1.182693 | -2.654909 |
| H  | -6.027019 | -1.199888 | -2.821248 |
| C  | -4.431313 | -0.458882 | -1.580774 |

|   |           |           |           |
|---|-----------|-----------|-----------|
| H | -5.100508 | 0.088271  | -0.923363 |
| C | -2.260763 | -0.753012 | 1.424437  |
| C | -3.202290 | -1.786525 | 1.544966  |
| H | -3.975682 | -1.905686 | 0.791468  |
| C | -3.135061 | -2.674690 | 2.619699  |
| H | -3.862715 | -3.477582 | 2.702582  |
| C | -2.133276 | -2.533946 | 3.583554  |
| H | -2.082521 | -3.226099 | 4.419740  |
| C | -1.187791 | -1.512461 | 3.462738  |
| H | -0.393673 | -1.412964 | 4.197338  |
| C | -1.241693 | -0.633595 | 2.380316  |
| H | -0.470118 | 0.118951  | 2.248230  |
| C | -4.275394 | 4.021066  | 0.368622  |
| H | -4.138638 | 5.024829  | -0.024530 |
| C | -3.350799 | 3.023622  | 0.056157  |
| H | -2.482133 | 3.240070  | -0.563546 |

3a

B3LYP-D3 SCF energy: -2030.91221627 a.u.  
 B3LYP-D3 enthalpy: -2030.244033 a.u.  
 B3LYP-D3 free energy: -2030.357117 a.u.  
 wB97XD SCF energy in solution: -2031.99953926 a.u.  
 wB97XD enthalpy in solution: -2031.331356 a.u.  
 wB97XD free energy in solution: -2031.444440 a.u.  
 Three lowest frequencies (cm<sup>-1</sup>): 10.5001 14.6358 25.0803

Cartesian coordinates

| ATOM | X         | Y        | Z         |
|------|-----------|----------|-----------|
| C    | 5.500144  | 2.370272 | 1.340157  |
| C    | 4.165971  | 2.588441 | 1.009561  |
| C    | 3.751919  | 2.730636 | -0.336629 |
| C    | 4.761106  | 2.644679 | -1.322972 |
| C    | 6.096178  | 2.426317 | -0.991318 |
| C    | 6.481204  | 2.283738 | 0.344952  |
| H    | 5.778310  | 2.262927 | 2.386233  |
| H    | 3.430161  | 2.643078 | 1.807078  |
| H    | 4.478981  | 2.745656 | -2.368905 |
| H    | 6.840642  | 2.363650 | -1.781836 |
| H    | 7.521669  | 2.112841 | 0.607310  |
| C    | 2.365507  | 2.904333 | -0.747922 |
| C    | 1.263609  | 2.917332 | 0.058710  |
| H    | 2.199317  | 2.939536 | -1.825909 |
| H    | 1.420716  | 2.878809 | 1.139993  |
| C    | -0.141639 | 2.858711 | -0.345561 |
| C    | -1.188789 | 3.429052 | 0.639640  |
| H    | -0.310045 | 3.203071 | -1.372999 |
| H    | -1.263106 | 4.525298 | 0.564661  |
| H    | -0.873388 | 3.192729 | 1.665769  |
| Cu   | -0.120235 | 0.857092 | -0.323277 |
| B    | -2.554125 | 2.714606 | 0.365696  |
| C    | -4.646847 | 2.245499 | -0.435367 |
| C    | -5.663119 | 2.944217 | 0.476152  |
| H    | -6.592709 | 2.371277 | 0.559665  |
| H    | -5.895640 | 3.928143 | 0.057914  |

|   |           |           |           |
|---|-----------|-----------|-----------|
| H | -5.250316 | 3.091720  | 1.479068  |
| C | -4.019384 | 0.956370  | 0.213041  |
| C | -3.436381 | -0.014796 | -0.820985 |
| H | -4.219049 | -0.487746 | -1.422507 |
| H | -2.881237 | -0.803168 | -0.306281 |
| H | -2.737353 | 0.499647  | -1.488837 |
| C | -4.925103 | 0.204298  | 1.185057  |
| H | -4.389315 | -0.661276 | 1.589121  |
| H | -5.825126 | -0.159274 | 0.676283  |
| H | -5.227304 | 0.836230  | 2.023159  |
| C | -5.233365 | 2.046584  | -1.830318 |
| H | -4.473559 | 1.704924  | -2.536711 |
| H | -5.633838 | 2.996070  | -2.199217 |
| H | -6.049620 | 1.315409  | -1.808601 |
| O | -2.900617 | 1.507688  | 0.959557  |
| O | -3.500968 | 3.131305  | -0.538917 |
| P | 0.290362  | -1.343898 | -0.042518 |
| C | -0.190367 | -1.907812 | 1.635236  |
| C | 0.421922  | -2.992421 | 2.281010  |
| H | 1.248072  | -3.512396 | 1.804274  |
| C | -0.017170 | -3.394229 | 3.543556  |
| H | 0.463040  | -4.233643 | 4.039277  |
| C | -1.064709 | -2.715036 | 4.171468  |
| H | -1.401980 | -3.028535 | 5.155796  |
| C | -0.614106 | -2.446901 | -1.196080 |
| C | -0.866782 | -1.953519 | -2.485940 |
| H | -0.541597 | -0.948521 | -2.746429 |
| C | -1.542657 | -2.736205 | -3.421142 |
| H | -1.734050 | -2.344918 | -4.416507 |
| C | -1.982795 | -4.015904 | -3.072137 |
| H | -2.515984 | -4.624101 | -3.797746 |
| C | -1.745696 | -4.508667 | -1.787035 |
| H | -2.094289 | -5.500239 | -1.511030 |
| C | -1.064661 | -3.728760 | -0.849974 |
| H | -0.895664 | -4.111993 | 0.152101  |
| C | 2.061531  | -1.765176 | -0.241957 |
| C | 2.513963  | -3.045165 | -0.599080 |
| H | 1.800584  | -3.840918 | -0.796728 |
| C | 3.882648  | -3.288412 | -0.721777 |
| H | 4.230432  | -4.279162 | -1.002490 |
| C | 4.803270  | -2.260169 | -0.495219 |
| H | 5.867387  | -2.454775 | -0.600209 |
| C | 4.359541  | -0.981653 | -0.149576 |
| H | 5.062730  | -0.169756 | 0.010516  |
| C | 2.991437  | -0.735741 | -0.026993 |
| H | 2.649735  | 0.266669  | 0.212825  |
| C | -1.666348 | -1.624209 | 3.539653  |
| H | -2.469143 | -1.080769 | 4.030598  |
| C | -1.229464 | -1.214201 | 2.278830  |
| H | -1.686180 | -0.347691 | 1.806274  |

3b

B3LYP-D3 SCF energy: -2030.89506273 a.u.  
 B3LYP-D3 enthalpy: -2030.226995 a.u.

B3LYP-D3 free energy: -2030.341376 a.u.  
 wB97XD SCF energy in solution: -2031.99953926 a.u.  
 wB97XD enthalpy in solution: 0.000000 a.u.  
 wB97XD free energy in solution: 0.000000 a.u.  
 Three lowest frequencies (cm-1): 13.3418 15.2980 20.9410

Cartesian coordinates

| ATOM | X         | Y         | Z         |
|------|-----------|-----------|-----------|
| C    | -6.283073 | -1.594341 | 1.078238  |
| C    | -4.989707 | -1.098002 | 0.918296  |
| C    | -4.246166 | -1.379481 | -0.240023 |
| C    | -4.844273 | -2.170505 | -1.230341 |
| C    | -6.139372 | -2.670248 | -1.074264 |
| C    | -6.865567 | -2.383920 | 0.082558  |
| H    | -6.840597 | -1.362374 | 1.982930  |
| H    | -4.546241 | -0.477756 | 1.691836  |
| H    | -4.284130 | -2.400384 | -2.134604 |
| H    | -6.579261 | -3.284251 | -1.856854 |
| H    | -7.873578 | -2.771151 | 0.208399  |
| C    | -2.823398 | -0.866660 | -0.402471 |
| C    | -1.811649 | -1.517124 | 0.587771  |
| H    | -2.488957 | -1.098096 | -1.423314 |
| H    | -2.146417 | -1.361988 | 1.621721  |
| C    | -1.510875 | -2.943515 | 0.321729  |
| C    | -1.190199 | -3.904788 | 1.211027  |
| H    | -1.505313 | -3.217262 | -0.738091 |
| H    | -0.944470 | -4.915068 | 0.895114  |
| H    | -1.180105 | -3.707219 | 2.281777  |
| Cu   | 0.005181  | -0.763196 | 0.422709  |
| B    | -2.669807 | 0.683163  | -0.215563 |
| C    | -2.411957 | 2.676570  | 0.861937  |
| C    | -3.314365 | 3.648813  | 1.614604  |
| H    | -2.961600 | 4.679672  | 1.494217  |
| H    | -3.305890 | 3.406436  | 2.682213  |
| H    | -4.346728 | 3.586043  | 1.263923  |
| C    | -2.339988 | 2.892586  | -0.691039 |
| C    | -1.183987 | 3.765374  | -1.167022 |
| H    | -1.269454 | 4.775015  | -0.748778 |
| H    | -1.206391 | 3.847097  | -2.258712 |
| H    | -0.216243 | 3.348193  | -0.884968 |
| C    | -3.663444 | 3.386437  | -1.288203 |
| H    | -3.612204 | 3.303156  | -2.378103 |
| H    | -3.859346 | 4.431754  | -1.026984 |
| H    | -4.500846 | 2.773933  | -0.939784 |
| C    | -1.024142 | 2.615898  | 1.514994  |
| H    | -0.369884 | 1.933316  | 0.961722  |
| H    | -1.129203 | 2.231319  | 2.534358  |
| H    | -0.550031 | 3.602160  | 1.554642  |
| O    | -2.147978 | 1.532861  | -1.175248 |
| O    | -2.980735 | 1.346534  | 0.952898  |
| P    | 2.179486  | -0.281688 | 0.041926  |
| C    | 3.025718  | -1.745130 | -0.672377 |
| C    | 2.502680  | -3.011849 | -0.361685 |
| H    | 1.607122  | -3.101304 | 0.251135  |
| C    | 3.115586  | -4.163166 | -0.858497 |
| H    | 2.701527  | -5.137723 | -0.615471 |

|   |          |           |           |
|---|----------|-----------|-----------|
| C | 4.244166 | -4.061221 | -1.674542 |
| H | 4.715652 | -4.958576 | -2.066064 |
| C | 2.432727 | 1.074497  | -1.165410 |
| C | 1.382283 | 1.353876  | -2.054264 |
| H | 0.435935 | 0.825224  | -1.964566 |
| C | 1.534505 | 2.341318  | -3.029365 |
| H | 0.714575 | 2.552340  | -3.709681 |
| C | 2.724362 | 3.066780  | -3.113145 |
| H | 2.838651 | 3.839161  | -3.868905 |
| C | 3.763134 | 2.811410  | -2.213201 |
| H | 4.683821 | 3.386269  | -2.265959 |
| C | 3.619301 | 1.821057  | -1.241123 |
| H | 4.423341 | 1.635999  | -0.534110 |
| C | 3.163751 | 0.197186  | 1.512349  |
| C | 4.521411 | -0.116639 | 1.672546  |
| H | 5.037512 | -0.700671 | 0.916004  |
| C | 5.207923 | 0.307151  | 2.811965  |
| H | 6.258856 | 0.057844  | 2.931319  |
| C | 4.546296 | 1.042438  | 3.798385  |
| H | 5.083043 | 1.367526  | 4.685426  |
| C | 3.191201 | 1.348366  | 3.649722  |
| H | 2.669585 | 1.908622  | 4.420765  |
| C | 2.500607 | 0.922586  | 2.515280  |
| H | 1.441561 | 1.143881  | 2.406691  |
| C | 4.758838 | -2.803509 | -1.999880 |
| H | 5.629232 | -2.720521 | -2.645226 |
| C | 4.152106 | -1.648830 | -1.504210 |
| H | 4.546069 | -0.674091 | -1.776883 |

3c

B3LYP-D3 SCF energy: -2030.90125341 a.u.  
 B3LYP-D3 enthalpy: -2030.233389 a.u.  
 B3LYP-D3 free energy: -2030.347134 a.u.  
 wb97XD SCF energy in solution: -2031.99953926 a.u.  
 wb97XD enthalpy in solution: 0.000000 a.u.  
 wb97XD free energy in solution: 0.000000 a.u.  
 Three lowest frequencies (cm-1): 15.5852 18.3772 25.8067

Cartesian coordinates

| ATOM | X         | Y         | Z         |
|------|-----------|-----------|-----------|
| C    | -0.868317 | -4.602148 | 0.901161  |
| C    | 0.166366  | -3.673966 | 0.778184  |
| C    | 0.611409  | -3.221811 | -0.484922 |
| C    | -0.025634 | -3.786873 | -1.615288 |
| C    | -1.060239 | -4.709779 | -1.493238 |
| C    | -1.499761 | -5.125452 | -0.230446 |
| H    | -1.183594 | -4.918111 | 1.893403  |
| H    | 0.625851  | -3.274605 | 1.677741  |
| H    | 0.293376  | -3.465095 | -2.605086 |
| H    | -1.526006 | -5.112334 | -2.390331 |
| H    | -2.302883 | -5.851146 | -0.132709 |
| C    | 1.601301  | -2.118243 | -0.659436 |
| C    | 2.740985  | -1.971993 | 0.400531  |
| H    | 2.042729  | -2.154091 | -1.662694 |



|    |           |           |           |
|----|-----------|-----------|-----------|
| H  | 2.311623  | -2.051762 | 1.407258  |
| C  | 3.820460  | -3.004468 | 0.228611  |
| C  | 4.156385  | -3.936492 | 1.123659  |
| H  | 4.339710  | -2.973736 | -0.731096 |
| H  | 4.935612  | -4.669109 | 0.927730  |
| H  | 3.656540  | -4.004603 | 2.088568  |
| Cu | 0.308239  | -0.616964 | -0.504990 |
| B  | 3.187614  | -0.482416 | 0.202570  |
| C  | 3.861204  | 1.390244  | -0.917287 |
| C  | 5.205155  | 2.040155  | -1.233051 |
| H  | 5.105318  | 3.130270  | -1.288249 |
| H  | 5.568343  | 1.680102  | -2.200788 |
| H  | 5.955857  | 1.793336  | -0.479309 |
| C  | 3.233621  | 1.802393  | 0.469955  |
| C  | 2.153100  | 2.878705  | 0.389946  |
| H  | 2.562437  | 3.809099  | -0.019579 |
| H  | 1.762520  | 3.089765  | 1.390652  |
| H  | 1.315021  | 2.562707  | -0.235039 |
| C  | 4.280309  | 2.172784  | 1.526639  |
| H  | 3.785472  | 2.257516  | 2.499273  |
| H  | 4.765836  | 3.127518  | 1.299258  |
| H  | 5.048259  | 1.397089  | 1.604640  |
| C  | 2.893913  | 1.570140  | -2.095006 |
| H  | 1.939367  | 1.072416  | -1.892337 |
| H  | 3.329768  | 1.104006  | -2.983908 |
| H  | 2.701420  | 2.626779  | -2.307698 |
| O  | 2.620008  | 0.563617  | 0.916691  |
| O  | 4.061155  | -0.039378 | -0.761229 |
| P  | -1.466463 | 0.667665  | -0.014753 |
| C  | -1.566262 | 1.074855  | 1.768975  |
| C  | -2.779775 | 1.334172  | 2.424178  |
| H  | -3.717083 | 1.265925  | 1.878977  |
| C  | -2.785786 | 1.661638  | 3.780732  |
| H  | -3.728538 | 1.859355  | 4.283800  |
| C  | -1.584425 | 1.725602  | 4.492147  |
| H  | -1.592982 | 1.976487  | 5.549486  |
| C  | -1.536914 | 2.275647  | -0.893355 |
| C  | -0.985709 | 2.318698  | -2.184784 |
| H  | -0.548059 | 1.417813  | -2.609439 |
| C  | -0.982679 | 3.508222  | -2.912298 |
| H  | -0.551798 | 3.530631  | -3.909449 |
| C  | -1.520716 | 4.669669  | -2.351614 |
| H  | -1.511300 | 5.599661  | -2.913486 |
| C  | -2.062069 | 4.636611  | -1.064410 |
| H  | -2.474046 | 5.540541  | -0.623842 |
| C  | -2.070888 | 3.445695  | -0.335208 |
| H  | -2.478878 | 3.430408  | 0.671102  |
| C  | -3.028107 | -0.202810 | -0.412874 |
| C  | -4.212692 | 0.463187  | -0.761580 |
| H  | -4.226726 | 1.547545  | -0.832743 |
| C  | -5.369743 | -0.268899 | -1.033296 |
| H  | -6.284697 | 0.250234  | -1.306242 |
| C  | -5.350315 | -1.664795 | -0.961278 |
| H  | -6.252432 | -2.230707 | -1.178243 |
| C  | -4.170459 | -2.331963 | -0.623470 |
| H  | -4.135631 | -3.416488 | -0.579793 |

|   |           |           |           |
|---|-----------|-----------|-----------|
| C | -3.009723 | -1.606790 | -0.354775 |
| H | -2.093139 | -2.138207 | -0.109643 |
| C | -0.375905 | 1.452996  | 3.847263  |
| H | 0.558771  | 1.485607  | 4.400601  |
| C | -0.362136 | 1.122891  | 2.490877  |
| H | 0.578882  | 0.893425  | 1.997253  |

3d

B3LYP-D3 SCF energy: -2030.89932105 a.u.  
 B3LYP-D3 enthalpy: -2030.230842 a.u.  
 B3LYP-D3 free energy: -2030.345095 a.u.  
 wB97XD SCF energy in solution: -2031.99953926 a.u.  
 wB97XD enthalpy in solution: 0.000000 a.u.  
 wB97XD free energy in solution: 0.000000 a.u.  
 Three lowest frequencies (cm<sup>-1</sup>): 12.6393 17.6761 20.6262

Cartesian coordinates

| ATOM | X         | Y         | Z         |
|------|-----------|-----------|-----------|
| C    | 8.261328  | 1.259645  | 1.244422  |
| C    | 6.902140  | 1.050630  | 1.028471  |
| C    | 6.273036  | 1.506366  | -0.147685 |
| C    | 7.070424  | 2.183151  | -1.089763 |
| C    | 8.432264  | 2.393684  | -0.875059 |
| C    | 9.037767  | 1.932067  | 0.294681  |
| H    | 8.719434  | 0.897733  | 2.161892  |
| H    | 6.319354  | 0.531019  | 1.783387  |
| H    | 6.608471  | 2.547105  | -2.005234 |
| H    | 9.020350  | 2.919950  | -1.623124 |
| H    | 10.098444 | 2.094407  | 0.467201  |
| C    | 4.844036  | 1.309206  | -0.430150 |
| C    | 3.950780  | 0.630773  | 0.310092  |
| H    | 4.492514  | 1.769129  | -1.355809 |
| H    | 4.264804  | 0.148941  | 1.236444  |
| C    | 2.493545  | 0.473943  | -0.011018 |
| C    | 1.583939  | 1.129987  | 1.091179  |
| H    | 2.272982  | 0.956481  | -0.973359 |
| H    | 1.864772  | 2.190483  | 1.185595  |
| H    | 1.812957  | 0.668921  | 2.064984  |
| Cu   | -0.327155 | 0.974817  | 0.683368  |
| B    | 2.060572  | -1.030028 | -0.096838 |
| C    | 2.001571  | -3.283211 | 0.284013  |
| C    | 3.073519  | -3.921903 | -0.607909 |
| H    | 2.778128  | -4.921829 | -0.943159 |
| H    | 4.003542  | -4.004653 | -0.037734 |
| H    | 3.270972  | -3.300068 | -1.486665 |
| C    | 0.719817  | -2.838890 | -0.511522 |
| C    | -0.513540 | -2.671170 | 0.382765  |
| H    | -0.859135 | -3.626536 | 0.789861  |
| H    | -1.329899 | -2.241770 | -0.202348 |
| H    | -0.303793 | -1.987895 | 1.211652  |
| C    | 0.377237  | -3.689575 | -1.730926 |
| H    | -0.507251 | -3.276539 | -2.227378 |
| H    | 0.152124  | -4.720234 | -1.433638 |
| H    | 1.196198  | -3.703583 | -2.453362 |

|   |           |           |           |
|---|-----------|-----------|-----------|
| C | 1.734164  | -4.159497 | 1.504211  |
| H | 1.101831  | -3.646030 | 2.231874  |
| H | 2.681672  | -4.404526 | 1.994469  |
| H | 1.247375  | -5.097003 | 1.211330  |
| O | 1.095070  | -1.508352 | -0.967797 |
| O | 2.537621  | -2.013628 | 0.737200  |
| P | -2.521684 | 0.721343  | 0.106365  |
| C | -3.592710 | 2.176739  | 0.415474  |
| C | -4.955693 | 2.074803  | 0.732062  |
| H | -5.417698 | 1.096811  | 0.833679  |
| C | -5.716355 | 3.228175  | 0.930708  |
| H | -6.771042 | 3.142464  | 1.178121  |
| C | -5.123515 | 4.488275  | 0.817893  |
| H | -5.717632 | 5.384119  | 0.976576  |
| C | -2.761987 | 0.312335  | -1.666241 |
| C | -1.692189 | -0.301992 | -2.338686 |
| H | -0.752724 | -0.487761 | -1.824544 |
| C | -1.831849 | -0.677885 | -3.676120 |
| H | -0.998564 | -1.153041 | -4.186536 |
| C | -3.027908 | -0.432637 | -4.354088 |
| H | -3.132386 | -0.720248 | -5.396852 |
| C | -4.087699 | 0.195702  | -3.694111 |
| H | -5.015094 | 0.399432  | -4.222751 |
| C | -3.957199 | 0.569473  | -2.355774 |
| H | -4.780184 | 1.068380  | -1.851762 |
| C | -3.321370 | -0.649590 | 1.030146  |
| C | -4.270058 | -1.516137 | 0.469233  |
| H | -4.573276 | -1.394403 | -0.566302 |
| C | -4.813489 | -2.550676 | 1.234052  |
| H | -5.544662 | -3.221036 | 0.790229  |
| C | -4.416057 | -2.727656 | 2.560956  |
| H | -4.837399 | -3.536410 | 3.151775  |
| C | -3.468696 | -1.869035 | 3.125230  |
| H | -3.148571 | -2.008661 | 4.154038  |
| C | -2.919401 | -0.839493 | 2.362186  |
| H | -2.161246 | -0.187658 | 2.790862  |
| C | -3.764451 | 4.596038  | 0.512822  |
| H | -3.297323 | 5.573932  | 0.436138  |
| C | -3.000089 | 3.445374  | 0.318032  |
| H | -1.937532 | 3.524597  | 0.098826  |

4

B3LYP-D3 SCF energy: -2030.90392489 a.u.  
 B3LYP-D3 enthalpy: -2030.236162 a.u.  
 B3LYP-D3 free energy: -2030.346992 a.u.  
 wB97XD SCF energy in solution: -2031.99487051 a.u.  
 wB97XD enthalpy in solution: -2031.327108 a.u.  
 wB97XD free energy in solution: -2031.437938 a.u.  
 Three lowest frequencies (cm<sup>-1</sup>): 7.5767 10.4764 15.2540

Cartesian coordinates

| ATOM | X        | Y        | Z        |
|------|----------|----------|----------|
| C    | 1.829652 | 4.597440 | 0.858517 |

|    |           |           |           |
|----|-----------|-----------|-----------|
| C  | 1.743625  | 3.222966  | 1.059368  |
| C  | 2.087310  | 2.306796  | 0.038279  |
| C  | 2.526179  | 2.853525  | -1.189300 |
| C  | 2.609494  | 4.229666  | -1.390088 |
| C  | 2.258563  | 5.116950  | -0.368349 |
| H  | 1.551723  | 5.272128  | 1.665087  |
| H  | 1.391957  | 2.852598  | 2.018091  |
| H  | 2.795078  | 2.174566  | -1.995904 |
| H  | 2.947475  | 4.611635  | -2.350725 |
| H  | 2.320299  | 6.190786  | -0.522228 |
| C  | 1.971831  | 0.858886  | 0.166196  |
| C  | 1.567957  | 0.163779  | 1.273479  |
| H  | 2.214002  | 0.299097  | -0.733745 |
| H  | 1.356312  | 0.729087  | 2.183134  |
| C  | 1.313960  | -1.271097 | 1.388343  |
| C  | 1.949952  | -2.201465 | 0.327935  |
| H  | 1.487218  | -1.633163 | 2.405523  |
| H  | 1.496029  | -2.051577 | -0.662034 |
| H  | 1.744600  | -3.241802 | 0.608933  |
| Cu | -0.636126 | -1.043883 | 1.021403  |
| B  | 3.497065  | -1.924835 | 0.213331  |
| C  | 5.585434  | -1.318550 | 0.896882  |
| C  | 5.456665  | 0.073589  | 1.529593  |
| H  | 6.348102  | 0.683362  | 1.347689  |
| H  | 5.330300  | -0.043988 | 2.610503  |
| H  | 4.578087  | 0.599823  | 1.145467  |
| C  | 5.509540  | -1.296489 | -0.679278 |
| C  | 6.183474  | -2.504982 | -1.339457 |
| H  | 7.273999  | -2.460754 | -1.249429 |
| H  | 5.922088  | -2.518825 | -2.402200 |
| H  | 5.832121  | -3.440218 | -0.892287 |
| C  | 5.986873  | 0.001155  | -1.327980 |
| H  | 5.887508  | -0.074232 | -2.415904 |
| H  | 7.040719  | 0.190455  | -1.093264 |
| H  | 5.391901  | 0.853821  | -0.993173 |
| C  | 6.793188  | -2.051846 | 1.474607  |
| H  | 6.820697  | -3.096536 | 1.156944  |
| H  | 6.743445  | -2.032972 | 2.567993  |
| H  | 7.725685  | -1.565031 | 1.166363  |
| O  | 4.085438  | -1.428690 | -0.927434 |
| O  | 4.382462  | -2.049796 | 1.257938  |
| P  | -2.635152 | -0.412696 | 0.122810  |
| C  | -4.107956 | -0.561801 | 1.208802  |
| C  | -4.810680 | -1.774631 | 1.291207  |
| H  | -4.544806 | -2.602724 | 0.640545  |
| C  | -5.862727 | -1.919870 | 2.196143  |
| H  | -6.403090 | -2.861377 | 2.244458  |
| C  | -6.221077 | -0.861427 | 3.033881  |
| H  | -7.041237 | -0.976131 | 3.737182  |
| C  | -2.614638 | 1.339958  | -0.424397 |
| C  | -1.376116 | 1.993083  | -0.499096 |
| H  | -0.467224 | 1.477180  | -0.204704 |
| C  | -1.296551 | 3.313112  | -0.951257 |
| H  | -0.328265 | 3.802436  | -0.996625 |
| C  | -2.459286 | 3.986190  | -1.326577 |
| H  | -2.403421 | 5.014168  | -1.674975 |

|   |           |           |           |
|---|-----------|-----------|-----------|
| C | -3.700520 | 3.343354  | -1.250335 |
| H | -4.605912 | 3.870611  | -1.539434 |
| C | -3.781289 | 2.026097  | -0.803202 |
| H | -4.749500 | 1.538502  | -0.734720 |
| C | -3.054479 | -1.379801 | -1.381638 |
| C | -4.327786 | -1.344709 | -1.972581 |
| H | -5.126024 | -0.772555 | -1.509005 |
| C | -4.577819 | -2.056800 | -3.144391 |
| H | -5.566557 | -2.026161 | -3.594126 |
| C | -3.559843 | -2.808396 | -3.739867 |
| H | -3.757585 | -3.362069 | -4.653673 |
| C | -2.292352 | -2.850739 | -3.157649 |
| H | -1.499426 | -3.436830 | -3.613661 |
| C | -2.041008 | -2.141834 | -1.980995 |
| H | -1.054227 | -2.180778 | -1.524637 |
| C | -5.519554 | 0.344031  | 2.965132  |
| H | -5.791652 | 1.171926  | 3.614167  |
| C | -4.466954 | 0.494257  | 2.061389  |
| H | -3.932404 | 1.438247  | 2.010954  |

TS2a

B3LYP-D3 SCF energy: -2030.89706174 a.u.  
 B3LYP-D3 enthalpy: -2030.230032 a.u.  
 B3LYP-D3 free energy: -2030.341364 a.u.  
 wB97XD SCF energy in solution: -2031.98992076 a.u.  
 wB97XD enthalpy in solution: -2031.322891 a.u.  
 wB97XD free energy in solution: -2031.434223 a.u.  
 Three lowest frequencies (cm-1): -76.2721 12.4874 21.3670  
 Imaginary frequency: -76.2721 cm-1

Cartesian coordinates

| ATOM | X         | Y         | Z         |
|------|-----------|-----------|-----------|
| C    | -0.240687 | 4.934927  | -1.027204 |
| C    | -0.544488 | 3.660391  | -1.501354 |
| C    | -1.188709 | 2.698104  | -0.683688 |
| C    | -1.518652 | 3.111625  | 0.630695  |
| C    | -1.211802 | 4.383709  | 1.101199  |
| C    | -0.564282 | 5.314633  | 0.279942  |
| H    | 0.260084  | 5.639866  | -1.687776 |
| H    | -0.252677 | 3.393825  | -2.514255 |
| H    | -2.004266 | 2.397914  | 1.294059  |
| H    | -1.478989 | 4.652738  | 2.121169  |
| H    | -0.327856 | 6.310348  | 0.644703  |
| C    | -1.445771 | 1.321071  | -1.089477 |
| C    | -1.425485 | 0.844840  | -2.460582 |
| H    | -1.980958 | 0.721541  | -0.356985 |
| H    | -1.193466 | 1.583003  | -3.230099 |
| C    | -1.583544 | -0.450003 | -2.913085 |
| C    | -1.955512 | -1.654649 | -2.055996 |
| H    | -1.515561 | -0.612120 | -3.984746 |
| H    | -1.091416 | -2.026674 | -1.481706 |
| H    | -2.242912 | -2.477566 | -2.723454 |
| Cu   | 0.355952  | 0.318759  | -1.315381 |
| B    | -3.128326 | -1.407212 | -1.033487 |

|   |           |           |           |
|---|-----------|-----------|-----------|
| C | -4.227971 | -1.293395 | 0.977680  |
| C | -4.624463 | -2.705713 | 1.423874  |
| H | -5.578281 | -2.708925 | 1.961281  |
| H | -3.850438 | -3.097978 | 2.091570  |
| H | -4.703561 | -3.379404 | 0.565005  |
| C | -5.134520 | -0.720085 | -0.181977 |
| C | -5.180642 | 0.812632  | -0.227288 |
| H | -5.736836 | 1.221903  | 0.622657  |
| H | -5.680723 | 1.119933  | -1.150614 |
| H | -4.177079 | 1.245929  | -0.236868 |
| C | -6.551627 | -1.287084 | -0.226900 |
| H | -7.090832 | -0.853996 | -1.075015 |
| H | -7.098547 | -1.037875 | 0.689654  |
| H | -6.548007 | -2.372412 | -0.349400 |
| C | -4.073923 | -0.377448 | 2.189028  |
| H | -3.645412 | 0.587157  | 1.908154  |
| H | -3.405593 | -0.843623 | 2.920476  |
| H | -5.042501 | -0.203924 | 2.671219  |
| O | -4.429501 | -1.152747 | -1.377604 |
| O | -2.930797 | -1.417530 | 0.333164  |
| P | 2.078076  | -0.372843 | -0.108921 |
| C | 3.704779  | -0.735232 | -0.877295 |
| C | 3.692223  | -1.279266 | -2.171305 |
| H | 2.741119  | -1.432092 | -2.677184 |
| C | 4.886966  | -1.612681 | -2.808454 |
| H | 4.866109  | -2.034479 | -3.809573 |
| C | 6.107161  | -1.390607 | -2.164666 |
| H | 7.039147  | -1.641520 | -2.663858 |
| C | 2.388311  | 0.843707  | 1.229088  |
| C | 1.979999  | 2.171300  | 1.028788  |
| H | 1.482906  | 2.461376  | 0.107613  |
| C | 2.169455  | 3.124607  | 2.030591  |
| H | 1.820766  | 4.139331  | 1.864339  |
| C | 2.767816  | 2.758519  | 3.237417  |
| H | 2.908718  | 3.498123  | 4.021244  |
| C | 3.167812  | 1.435009  | 3.448441  |
| H | 3.619062  | 1.145765  | 4.393920  |
| C | 2.972988  | 0.477707  | 2.452910  |
| H | 3.255500  | -0.556261 | 2.633103  |
| C | 1.601754  | -1.918930 | 0.761514  |
| C | 2.518772  | -2.929356 | 1.085093  |
| H | 3.565604  | -2.821290 | 0.815897  |
| C | 2.084774  | -4.082883 | 1.742223  |
| H | 2.800649  | -4.862530 | 1.988977  |
| C | 0.736441  | -4.239594 | 2.073476  |
| H | 0.402639  | -5.143387 | 2.576337  |
| C | -0.181541 | -3.237848 | 1.748220  |
| H | -1.236418 | -3.351643 | 1.981035  |
| C | 0.246623  | -2.081259 | 1.098394  |
| H | -0.483609 | -1.317714 | 0.845806  |
| C | 6.128044  | -0.834519 | -0.883746 |
| H | 7.075797  | -0.651009 | -0.384732 |
| C | 4.932995  | -0.508370 | -0.239233 |
| H | 4.958364  | -0.068594 | 0.752919  |

TS2b

B3LYP-D3 SCF energy: -2030.90288736 a.u.  
B3LYP-D3 enthalpy: -2030.236363 a.u.  
B3LYP-D3 free energy: -2030.345120 a.u.  
wB97XD SCF energy in solution: -2031.99291329 a.u.  
wB97XD enthalpy in solution: -2031.326389 a.u.  
wB97XD free energy in solution: -2031.435146 a.u.  
Three lowest frequencies (cm-1): -44.5044 19.0077 28.1995  
Imaginary frequency: -44.5044 cm-1

Cartesian coordinates

| ATOM | X         | Y         | Z         |
|------|-----------|-----------|-----------|
| C    | -4.818312 | -2.527092 | 1.402096  |
| C    | -3.542805 | -2.730521 | 0.883141  |
| C    | -3.289211 | -2.680200 | -0.512944 |
| C    | -4.411480 | -2.429773 | -1.342441 |
| C    | -5.683672 | -2.223596 | -0.818630 |
| C    | -5.907550 | -2.265142 | 0.562827  |
| H    | -4.962752 | -2.566980 | 2.480001  |
| H    | -2.719900 | -2.902285 | 1.572757  |
| H    | -4.262007 | -2.382738 | -2.419571 |
| H    | -6.512054 | -2.029496 | -1.497236 |
| H    | -6.901388 | -2.107942 | 0.972568  |
| C    | -1.964990 | -2.786018 | -1.101525 |
| C    | -0.776429 | -3.193595 | -0.408239 |
| H    | -1.919884 | -2.746848 | -2.191192 |
| H    | -0.892684 | -3.498108 | 0.636184  |
| C    | 0.538171  | -3.098267 | -0.860008 |
| C    | 1.753422  | -3.460814 | -0.043690 |
| H    | 0.710507  | -2.885741 | -1.918700 |
| H    | 2.209355  | -4.414368 | -0.361910 |
| H    | 1.457156  | -3.630801 | 1.004649  |
| Cu   | -0.651997 | -1.104875 | -0.517773 |
| B    | 2.881002  | -2.360887 | -0.041172 |
| C    | 4.871889  | -1.348727 | 0.430125  |
| C    | 4.835831  | -0.992501 | 1.922158  |
| H    | 5.388443  | -0.071203 | 2.132758  |
| H    | 5.286347  | -1.809920 | 2.493030  |
| H    | 3.804817  | -0.864514 | 2.267448  |
| C    | 3.982684  | -0.397234 | -0.447547 |
| C    | 4.355637  | -0.419505 | -1.934818 |
| H    | 5.307730  | 0.089351  | -2.118547 |
| H    | 3.572127  | 0.095505  | -2.498041 |
| H    | 4.430617  | -1.446551 | -2.306369 |
| C    | 3.892836  | 1.042525  | 0.048520  |
| H    | 3.281253  | 1.636290  | -0.634742 |
| H    | 4.892645  | 1.490380  | 0.088592  |
| H    | 3.441763  | 1.102723  | 1.040694  |
| C    | 6.313159  | -1.506793 | -0.043601 |
| H    | 6.357832  | -1.915947 | -1.055183 |
| H    | 6.847893  | -2.191896 | 0.621890  |
| H    | 6.831447  | -0.541128 | -0.030204 |
| O    | 2.673693  | -1.029947 | -0.343402 |
| O    | 4.190082  | -2.624316 | 0.289594  |
| P    | -0.644754 | 1.054184  | -0.069841 |

|   |           |           |           |
|---|-----------|-----------|-----------|
| C | -0.101155 | 1.381548  | 1.655457  |
| C | -0.636446 | 2.405671  | 2.448845  |
| H | -1.434696 | 3.032112  | 2.061342  |
| C | -0.154527 | 2.611392  | 3.743709  |
| H | -0.575618 | 3.404878  | 4.355266  |
| C | 0.858064  | 1.796313  | 4.254400  |
| H | 1.227438  | 1.956499  | 5.263718  |
| C | 0.477267  | 2.076048  | -1.098807 |
| C | 0.862991  | 1.567147  | -2.347452 |
| H | 0.498047  | 0.592329  | -2.661866 |
| C | 1.728132  | 2.291510  | -3.168427 |
| H | 2.021810  | 1.888040  | -4.133559 |
| C | 2.225438  | 3.526002  | -2.742016 |
| H | 2.906577  | 4.086242  | -3.376634 |
| C | 1.855482  | 4.033574  | -1.493902 |
| H | 2.250482  | 4.987385  | -1.154874 |
| C | 0.986910  | 3.311907  | -0.673244 |
| H | 0.724604  | 3.698422  | 0.307641  |
| C | -2.311435 | 1.808822  | -0.205491 |
| C | -2.533448 | 3.167622  | -0.477801 |
| H | -1.694463 | 3.834521  | -0.654582 |
| C | -3.837534 | 3.661420  | -0.541718 |
| H | -4.005130 | 4.713117  | -0.758991 |
| C | -4.924234 | 2.806154  | -0.335344 |
| H | -5.937402 | 3.195620  | -0.391318 |
| C | -4.709089 | 1.451501  | -0.072167 |
| H | -5.540509 | 0.768124  | 0.073856  |
| C | -3.407660 | 0.952112  | -0.013346 |
| H | -3.250559 | -0.107601 | 0.165721  |
| C | 1.387450  | 0.767427  | 3.470332  |
| H | 2.168791  | 0.125467  | 3.868561  |
| C | 0.907671  | 0.555025  | 2.177758  |
| H | 1.317036  | -0.239430 | 1.558961  |

5a

B3LYP-D3 SCF energy: -2030.91393386 a.u.  
 B3LYP-D3 enthalpy: -2030.245658 a.u.  
 B3LYP-D3 free energy: -2030.357090 a.u.  
 wB97XD SCF energy in solution: -2032.00629096 a.u.  
 wB97XD enthalpy in solution: -2031.338015 a.u.  
 wB97XD free energy in solution: -2031.449447 a.u.  
 Three lowest frequencies (cm<sup>-1</sup>): 14.5165 19.2991 28.6218

Cartesian coordinates

| ATOM | X        | Y        | Z         |
|------|----------|----------|-----------|
| C    | 4.229153 | 3.245669 | -0.396206 |
| C    | 2.887357 | 3.159068 | -0.776200 |
| C    | 1.842779 | 3.200054 | 0.175661  |
| C    | 2.233411 | 3.364809 | 1.527057  |
| C    | 3.568370 | 3.447920 | 1.904927  |
| C    | 4.587831 | 3.381837 | 0.945777  |
| H    | 4.999677 | 3.209596 | -1.163938 |
| H    | 2.652747 | 3.047046 | -1.830308 |
| H    | 1.455599 | 3.404537 | 2.287989  |



|    |           |           |           |
|----|-----------|-----------|-----------|
| H  | 3.819534  | 3.568023  | 2.956632  |
| H  | 5.631838  | 3.450677  | 1.239056  |
| C  | 0.404244  | 3.015859  | -0.155475 |
| C  | -0.066497 | 3.167087  | -1.547213 |
| H  | -0.245203 | 3.499194  | 0.581185  |
| H  | 0.673511  | 3.020968  | -2.332931 |
| C  | -1.333967 | 3.403645  | -1.944307 |
| C  | -2.490805 | 3.575334  | -0.991669 |
| H  | -1.553083 | 3.432255  | -3.009317 |
| H  | -3.349807 | 4.021441  | -1.516621 |
| H  | -2.246686 | 4.285110  | -0.187423 |
| Cu | 0.249365  | 1.034161  | 0.062027  |
| B  | -3.013646 | 2.250050  | -0.319355 |
| C  | -3.835302 | 0.127026  | -0.138447 |
| C  | -5.146304 | 0.141851  | -0.935259 |
| H  | -5.892002 | -0.528580 | -0.495739 |
| H  | -4.940590 | -0.188891 | -1.957962 |
| H  | -5.567590 | 1.151004  | -0.981517 |
| C  | -3.943372 | 0.864499  | 1.242402  |
| C  | -2.821888 | 0.481459  | 2.216671  |
| H  | -2.939466 | -0.537814 | 2.597451  |
| H  | -2.833086 | 1.178268  | 3.060440  |
| H  | -1.842224 | 0.558419  | 1.731662  |
| C  | -5.302586 | 0.755765  | 1.926612  |
| H  | -5.282905 | 1.301528  | 2.875254  |
| H  | -5.544871 | -0.291926 | 2.138969  |
| H  | -6.096450 | 1.182602  | 1.309793  |
| C  | -3.277493 | -1.287239 | -0.067001 |
| H  | -2.281771 | -1.300777 | 0.371702  |
| H  | -3.210053 | -1.719191 | -1.070301 |
| H  | -3.927724 | -1.927282 | 0.540021  |
| O  | -3.716842 | 2.247145  | 0.863850  |
| O  | -2.902615 | 0.981125  | -0.863193 |
| P  | 0.783470  | -1.157340 | -0.071416 |
| C  | 2.575307  | -1.426416 | 0.208882  |
| C  | 3.434560  | -0.323161 | 0.092820  |
| H  | 3.041006  | 0.661973  | -0.140742 |
| C  | 4.806624  | -0.477359 | 0.295810  |
| H  | 5.451164  | 0.392940  | 0.215890  |
| C  | 5.329053  | -1.730738 | 0.619288  |
| H  | 6.396732  | -1.850184 | 0.783418  |
| C  | -0.022606 | -2.328108 | 1.089899  |
| C  | -0.180448 | -1.900934 | 2.418102  |
| H  | 0.171340  | -0.914307 | 2.710639  |
| C  | -0.800211 | -2.726161 | 3.355256  |
| H  | -0.919048 | -2.385069 | 4.379951  |
| C  | -1.278674 | -3.982369 | 2.971837  |
| H  | -1.770289 | -4.622339 | 3.699414  |
| C  | -1.129084 | -4.411170 | 1.651261  |
| H  | -1.503475 | -5.385576 | 1.349208  |
| C  | -0.502345 | -3.589549 | 0.711641  |
| H  | -0.400764 | -3.922795 | -0.316740 |
| C  | 0.407647  | -1.785256 | -1.752733 |
| C  | 1.116305  | -2.833873 | -2.358796 |
| H  | 1.952629  | -3.295741 | -1.842169 |
| C  | 0.759876  | -3.274102 | -3.634259 |

|   |           |           |           |
|---|-----------|-----------|-----------|
| H | 1.314662  | -4.084492 | -4.099455 |
| C | -0.301036 | -2.669471 | -4.314134 |
| H | -0.573205 | -3.011952 | -5.308916 |
| C | -1.001518 | -1.617327 | -3.720191 |
| H | -1.818006 | -1.134425 | -4.249960 |
| C | -0.648068 | -1.168914 | -2.446450 |
| H | -1.192800 | -0.342053 | -1.996193 |
| C | 4.476735  | -2.831974 | 0.748362  |
| H | 4.880248  | -3.805834 | 1.012672  |
| C | 3.104131  | -2.682328 | 0.550365  |
| H | 2.443563  | -3.535946 | 0.677122  |

5b

B3LYP-D3 SCF energy: -2030.91019770 a.u.  
 B3LYP-D3 enthalpy: -2030.241850 a.u.  
 B3LYP-D3 free energy: -2030.354115 a.u.  
 WB97XD SCF energy in solution: -2032.00134968 a.u.  
 WB97XD enthalpy in solution: -2031.333002 a.u.  
 WB97XD free energy in solution: -2031.445267 a.u.  
 Three lowest frequencies (cm<sup>-1</sup>): 14.2590 21.1888 26.9270

Cartesian coordinates

| ATOM | X         | Y         | Z         |
|------|-----------|-----------|-----------|
| C    | -3.679399 | -3.380281 | 1.020199  |
| C    | -2.318550 | -3.271434 | 0.729764  |
| C    | -1.847415 | -3.213328 | -0.604174 |
| C    | -2.828788 | -3.313522 | -1.621207 |
| C    | -4.183507 | -3.426947 | -1.329639 |
| C    | -4.629361 | -3.452967 | -0.001434 |
| H    | -3.997444 | -3.412699 | 2.060133  |
| H    | -1.611155 | -3.219769 | 1.551878  |
| H    | -2.503713 | -3.274333 | -2.659342 |
| H    | -4.900610 | -3.496729 | -2.144814 |
| H    | -5.687342 | -3.546255 | 0.228329  |
| C    | -0.428395 | -2.970314 | -0.971399 |
| C    | 0.654361  | -3.166168 | 0.006704  |
| H    | -0.181935 | -3.328843 | -1.975124 |
| H    | 0.416255  | -2.924794 | 1.045736  |
| C    | 1.934450  | -3.510979 | -0.246651 |
| C    | 3.054405  | -3.399818 | 0.771676  |
| H    | 2.232435  | -3.742501 | -1.270894 |
| H    | 3.769115  | -4.227287 | 0.686132  |
| H    | 2.641871  | -3.404073 | 1.788849  |
| Cu   | -0.517378 | -0.971266 | -0.867598 |
| B    | 3.716017  | -2.014622 | 0.442403  |
| C    | 5.110433  | -0.426832 | -0.426726 |
| C    | 6.208851  | -0.171640 | 0.612112  |
| H    | 6.550294  | 0.868703  | 0.591066  |
| H    | 7.060779  | -0.823105 | 0.395156  |
| H    | 5.851260  | -0.402692 | 1.620469  |
| C    | 3.733105  | 0.215908  | -0.032202 |
| C    | 2.781922  | 0.359159  | -1.227644 |
| H    | 3.106622  | 1.146152  | -1.915659 |
| H    | 1.787661  | 0.624396  | -0.861990 |

|   |           |           |           |
|---|-----------|-----------|-----------|
| H | 2.694194  | -0.584566 | -1.775172 |
| C | 3.817475  | 1.529794  | 0.738283  |
| H | 2.809691  | 1.889444  | 0.968353  |
| H | 4.323806  | 2.295315  | 0.139304  |
| H | 4.356128  | 1.407035  | 1.680826  |
| C | 5.607908  | -0.078973 | -1.826303 |
| H | 4.905899  | -0.413204 | -2.593261 |
| H | 6.568388  | -0.570867 | -2.010363 |
| H | 5.751881  | 1.003022  | -1.927078 |
| O | 3.166827  | -0.805245 | 0.835257  |
| O | 4.805903  | -1.847155 | -0.379922 |
| P | -1.095909 | 1.060378  | -0.077036 |
| C | -0.319984 | 2.520667  | -0.868161 |
| C | 0.104711  | 3.649014  | -0.152545 |
| H | -0.036472 | 3.694289  | 0.923226  |
| C | 0.722141  | 4.709594  | -0.819433 |
| H | 1.052990  | 5.578931  | -0.257618 |
| C | 0.917398  | 4.652876  | -2.200979 |
| H | 1.401326  | 5.478145  | -2.716162 |
| C | -2.903737 | 1.327680  | -0.176619 |
| C | -3.725463 | 0.189033  | -0.138048 |
| H | -3.289510 | -0.804671 | -0.078540 |
| C | -5.112650 | 0.328239  | -0.178739 |
| H | -5.731978 | -0.563285 | -0.148786 |
| C | -5.686464 | 1.598486  | -0.270476 |
| H | -6.767242 | 1.705682  | -0.310214 |
| C | -4.871837 | 2.733443  | -0.321182 |
| H | -5.317465 | 3.721425  | -0.401047 |
| C | -3.483005 | 2.602032  | -0.274471 |
| H | -2.851666 | 3.485157  | -0.324365 |
| C | -0.662615 | 1.192452  | 1.698044  |
| C | -1.409489 | 1.947511  | 2.614789  |
| H | -2.313580 | 2.456348  | 2.292379  |
| C | -0.996666 | 2.034697  | 3.945432  |
| H | -1.580295 | 2.617204  | 4.653294  |
| C | 0.160000  | 1.372748  | 4.367899  |
| H | 0.476724  | 1.443699  | 5.405049  |
| C | 0.901219  | 0.613818  | 3.459330  |
| H | 1.799640  | 0.091008  | 3.774778  |
| C | 0.488357  | 0.514359  | 2.130264  |
| H | 1.070664  | -0.089688 | 1.440409  |
| C | 0.497955  | 3.529542  | -2.919576 |
| H | 0.655951  | 3.477369  | -3.993262 |
| C | -0.110724 | 2.465645  | -2.255600 |
| H | -0.412378 | 1.578432  | -2.808217 |

TS3

B3LYP-D3 SCF energy: -2146.64241177 a.u.  
 B3LYP-D3 enthalpy: -2145.921847 a.u.  
 B3LYP-D3 free energy: -2146.041801 a.u.  
 wB97XD SCF energy in solution: -2147.72364006 a.u.  
 wB97XD enthalpy in solution: -2147.003075 a.u.  
 wB97XD free energy in solution: -2147.123029 a.u.  
 Three lowest frequencies (cm-1): -1244.5606 11.2638 19.5175

Imaginary frequency: -1244.5606 cm-1

Cartesian coordinates

| ATOM | X         | Y         | Z         |
|------|-----------|-----------|-----------|
| C    | 6.048960  | -0.300321 | -0.504277 |
| C    | 4.717677  | -0.681620 | -0.666489 |
| C    | 4.258277  | -1.952519 | -0.258495 |
| C    | 5.211294  | -2.812160 | 0.326170  |
| C    | 6.540197  | -2.429026 | 0.495512  |
| C    | 6.975104  | -1.167026 | 0.080869  |
| H    | 6.365098  | 0.685313  | -0.841971 |
| H    | 4.026972  | 0.024033  | -1.117514 |
| H    | 4.894021  | -3.801184 | 0.651997  |
| H    | 7.243249  | -3.124132 | 0.949695  |
| H    | 8.011806  | -0.867537 | 0.209268  |
| C    | 2.842979  | -2.371108 | -0.349923 |
| C    | 1.968519  | -1.795264 | -1.347333 |
| H    | 2.697440  | -3.443243 | -0.184931 |
| H    | 2.334510  | -0.911007 | -1.870508 |
| C    | 0.666259  | -2.139378 | -1.648075 |
| C    | -0.052655 | -3.393018 | -1.166240 |
| H    | 0.202659  | -1.628753 | -2.492297 |
| H    | 0.518017  | -3.849025 | -0.345284 |
| H    | -0.108677 | -4.152111 | -1.959716 |
| Cu   | 0.198847  | -0.638124 | 0.068585  |
| B    | -1.483723 | -3.058285 | -0.616825 |
| C    | -3.037939 | -1.963176 | 0.691885  |
| C    | -2.903368 | -2.531277 | 2.107550  |
| H    | -2.489366 | -3.544049 | 2.089085  |
| H    | -3.868764 | -2.554171 | 2.622815  |
| H    | -2.217442 | -1.898258 | 2.678287  |
| C    | -3.744149 | -2.939786 | -0.318602 |
| C    | -4.306268 | -2.219294 | -1.550497 |
| H    | -5.192993 | -1.627810 | -1.301147 |
| H    | -4.583726 | -2.966855 | -2.299608 |
| H    | -3.559893 | -1.551045 | -1.991505 |
| C    | -4.800018 | -3.847961 | 0.301725  |
| H    | -5.226803 | -4.496714 | -0.469362 |
| H    | -5.610644 | -3.252327 | 0.736574  |
| H    | -4.373482 | -4.483405 | 1.080790  |
| C    | -3.616378 | -0.553877 | 0.730090  |
| H    | -3.547259 | -0.061548 | -0.240236 |
| H    | -3.070000 | 0.057203  | 1.453983  |
| H    | -4.667702 | -0.585858 | 1.037698  |
| O    | -2.639641 | -3.765629 | -0.793514 |
| O    | -1.686470 | -1.911804 | 0.139714  |
| P    | -0.323558 | 1.528747  | -0.029826 |
| C    | 1.073189  | 2.536148  | -0.659820 |
| C    | 2.360303  | 2.120303  | -0.280272 |
| H    | 2.480788  | 1.228741  | 0.331596  |
| C    | 3.480799  | 2.838892  | -0.696159 |
| H    | 4.470229  | 2.502708  | -0.398765 |
| C    | 3.325259  | 3.968952  | -1.504018 |
| H    | 4.198429  | 4.523817  | -1.836584 |
| C    | -1.745896 | 1.907872  | -1.132408 |
| C    | -1.854851 | 1.119178  | -2.291280 |

|   |           |           |           |
|---|-----------|-----------|-----------|
| H | -1.100639 | 0.361330  | -2.488880 |
| C | -2.930789 | 1.280811  | -3.162790 |
| H | -3.001073 | 0.664327  | -4.054934 |
| C | -3.924744 | 2.222227  | -2.877946 |
| H | -4.771507 | 2.340783  | -3.548489 |
| C | -3.829933 | 3.002960  | -1.724864 |
| H | -4.603397 | 3.731132  | -1.495354 |
| C | -2.745499 | 2.850584  | -0.856187 |
| H | -2.693164 | 3.452856  | 0.045120  |
| C | -0.722089 | 2.307041  | 1.586707  |
| C | -0.981175 | 1.453959  | 2.669827  |
| H | -0.905960 | 0.379015  | 2.525245  |
| C | -1.294478 | 1.979610  | 3.924580  |
| H | -1.489519 | 1.310106  | 4.757923  |
| C | -1.339043 | 3.362847  | 4.109509  |
| H | -1.577149 | 3.773823  | 5.086882  |
| C | -1.057022 | 4.220147  | 3.041663  |
| H | -1.071683 | 5.296694  | 3.189418  |
| C | -0.744063 | 3.696114  | 1.787117  |
| H | -0.499609 | 4.365081  | 0.966153  |
| C | 2.047857  | 4.379470  | -1.893625 |
| H | 1.926842  | 5.253528  | -2.528222 |
| C | 0.921891  | 3.667312  | -1.473199 |
| H | -0.069783 | 3.984122  | -1.785331 |
| C | 0.916201  | -2.273282 | 2.500861  |
| H | 0.275776  | -3.042877 | 2.036110  |
| H | 0.313954  | -1.764812 | 3.268324  |
| H | 1.746529  | -2.782995 | 3.013275  |
| O | 1.397406  | -1.333741 | 1.568481  |
| H | 2.182548  | -1.855675 | 0.796127  |

LCu-OMe

B3LYP-D3 SCF energy: -1347.64091110 a.u.  
 B3LYP-D3 enthalpy: -1347.301034 a.u.  
 B3LYP-D3 free energy: -1347.379416 a.u.  
 wB97XD SCF energy in solution: -1348.79141752 a.u.  
 wB97XD enthalpy in solution: -1348.451540 a.u.  
 wB97XD free energy in solution: -1348.529922 a.u.  
 Three lowest frequencies (cm-1): 18.9378 28.2650 33.3651

Cartesian coordinates

| ATOM | X         | Y         | Z         |
|------|-----------|-----------|-----------|
| Cu   | -2.210959 | -0.087692 | -0.593611 |
| P    | -0.063744 | -0.005751 | -0.068513 |
| C    | 0.975002  | -1.186933 | -1.013004 |
| C    | 2.173560  | -1.720967 | -0.516018 |
| H    | 2.507588  | -1.468722 | 0.486429  |
| C    | 2.930801  | -2.590886 | -1.302007 |
| H    | 3.856672  | -3.003461 | -0.910402 |
| C    | 2.496892  | -2.936554 | -2.584358 |
| H    | 3.086760  | -3.617267 | -3.192079 |
| C    | 0.702571  | 1.638884  | -0.344323 |
| C    | -0.132376 | 2.763118  | -0.249730 |
| H    | -1.195334 | 2.625593  | -0.063363 |

|   |           |           |           |
|---|-----------|-----------|-----------|
| C | 0.392929  | 4.045613  | -0.408553 |
| H | -0.261390 | 4.909625  | -0.334363 |
| C | 1.753582  | 4.214741  | -0.675267 |
| H | 2.162059  | 5.213092  | -0.806065 |
| C | 2.587185  | 3.099140  | -0.787398 |
| H | 3.643486  | 3.228116  | -1.007404 |
| C | 2.066085  | 1.814593  | -0.624592 |
| H | 2.716643  | 0.951134  | -0.728104 |
| C | 0.257586  | -0.395728 | 1.695466  |
| C | 1.331040  | 0.144630  | 2.418927  |
| H | 1.998469  | 0.861365  | 1.949384  |
| C | 1.534659  | -0.225507 | 3.749482  |
| H | 2.366269  | 0.198953  | 4.305412  |
| C | 0.669822  | -1.132570 | 4.366598  |
| H | 0.829399  | -1.415787 | 5.403404  |
| C | -0.407061 | -1.665876 | 3.654220  |
| H | -1.089028 | -2.362156 | 4.134133  |
| C | -0.616422 | -1.295243 | 2.325932  |
| H | -1.464385 | -1.693820 | 1.773070  |
| C | 1.298374  | -2.417640 | -3.079733 |
| H | 0.950559  | -2.694533 | -4.070924 |
| C | 0.536917  | -1.550676 | -2.295725 |
| H | -0.407041 | -1.161402 | -2.671133 |
| O | -3.910990 | -0.169692 | -1.153747 |
| C | -5.064410 | -0.034671 | -0.381561 |
| H | -5.161751 | 0.962811  | 0.090398  |
| H | -5.960789 | -0.172790 | -1.012202 |
| H | -5.136722 | -0.778704 | 0.436088  |

6a

B3LYP-D3 SCF energy: -798.99025816 a.u.  
 B3LYP-D3 enthalpy: -798.605256 a.u.  
 B3LYP-D3 free energy: -798.672762 a.u.  
 wb97XD SCF energy in solution: -798.94912660 a.u.  
 wb97XD enthalpy in solution: -798.564124 a.u.  
 wb97XD free energy in solution: -798.631630 a.u.  
 Three lowest frequencies (cm<sup>-1</sup>): 17.0634 28.2997 39.7903

Cartesian coordinates

| ATOM | X        | Y         | Z         |
|------|----------|-----------|-----------|
| C    | 2.260766 | -2.027610 | -0.397422 |
| C    | 1.929556 | -0.707898 | -0.711173 |
| C    | 2.791093 | 0.343941  | -0.367345 |
| C    | 3.984083 | 0.043051  | 0.301418  |
| C    | 4.313180 | -1.275545 | 0.623398  |
| C    | 3.451810 | -2.316966 | 0.273390  |
| H    | 1.591384 | -2.834375 | -0.686197 |
| H    | 0.995927 | -0.489119 | -1.222318 |
| H    | 4.663944 | 0.849527  | 0.569195  |
| H    | 5.245086 | -1.488941 | 1.140956  |
| H    | 3.708811 | -3.344880 | 0.515395  |
| C    | 2.414945 | 1.784456  | -0.678171 |
| H    | 3.329995 | 2.360461  | -0.875581 |
| H    | 1.816122 | 1.816860  | -1.593759 |

|   |           |           |           |
|---|-----------|-----------|-----------|
| C | 1.666508  | 2.417457  | 0.472708  |
| C | 0.380049  | 2.787079  | 0.494773  |
| H | 2.252194  | 2.540968  | 1.383758  |
| H | -0.016492 | 3.181788  | 1.429582  |
| C | -0.639333 | 2.640016  | -0.613358 |
| H | -1.329658 | 3.493616  | -0.592710 |
| H | -0.173860 | 2.615244  | -1.603534 |
| B | -1.425712 | 1.299688  | -0.351866 |
| C | -2.263226 | -0.803635 | -0.641903 |
| C | -3.553058 | -0.674285 | -1.460258 |
| H | -4.289336 | -1.432006 | -1.172961 |
| H | -3.315728 | -0.803208 | -2.520634 |
| H | -4.001494 | 0.315750  | -1.330290 |
| C | -2.427433 | -0.347916 | 0.853833  |
| C | -1.336006 | -0.905210 | 1.776737  |
| H | -1.471753 | -1.976363 | 1.959117  |
| H | -1.385143 | -0.380221 | 2.735445  |
| H | -0.338854 | -0.744721 | 1.354703  |
| C | -3.808964 | -0.584851 | 1.455234  |
| H | -3.826781 | -0.223118 | 2.488092  |
| H | -4.047541 | -1.654563 | 1.463197  |
| H | -4.585824 | -0.055525 | 0.899069  |
| C | -1.649049 | -2.187115 | -0.831379 |
| H | -0.666368 | -2.256775 | -0.362205 |
| H | -1.532982 | -2.394802 | -1.899986 |
| H | -2.298546 | -2.958032 | -0.401382 |
| O | -2.197032 | 1.087009  | 0.763348  |
| O | -1.338475 | 0.194763  | -1.165914 |

TS4a

B3LYP-D3 SCF energy: -2170.26090594 a.u.  
 B3LYP-D3 enthalpy: -2169.533180 a.u.  
 B3LYP-D3 free energy: -2169.650120 a.u.  
 wB97XD SCF energy in solution: -2171.35797569 a.u.  
 wB97XD enthalpy in solution: -2170.630250 a.u.  
 wB97XD free energy in solution: -2170.747190 a.u.  
 Three lowest frequencies (cm<sup>-1</sup>): -33.8111 13.9471 20.4560  
 Imaginary frequency: -33.8111 cm<sup>-1</sup>

Cartesian coordinates

| ATOM | X         | Y         | Z         |
|------|-----------|-----------|-----------|
| Cu   | -0.065039 | -0.856400 | 0.339636  |
| P    | 2.078450  | -0.429615 | -0.069147 |
| C    | 3.180968  | -1.803772 | -0.565860 |
| C    | 4.325316  | -1.629996 | -1.358488 |
| H    | 4.579591  | -0.644771 | -1.738236 |
| C    | 5.129878  | -2.725995 | -1.673912 |
| H    | 6.013313  | -2.586347 | -2.291050 |
| C    | 4.797734  | -3.999211 | -1.203804 |
| H    | 5.424502  | -4.850718 | -1.454372 |
| C    | 2.237833  | 0.855416  | -1.370367 |
| C    | 1.213318  | 0.952462  | -2.325022 |
| H    | 0.347944  | 0.298823  | -2.260103 |
| C    | 1.275547  | 1.926305  | -3.323116 |

|   |           |           |           |
|---|-----------|-----------|-----------|
| H | 0.473197  | 1.998331  | -4.051668 |
| C | 2.349790  | 2.817780  | -3.366133 |
| H | 2.390990  | 3.582971  | -4.136584 |
| C | 3.364220  | 2.736423  | -2.408046 |
| H | 4.193365  | 3.438408  | -2.430952 |
| C | 3.309607  | 1.760899  | -1.412006 |
| H | 4.087452  | 1.717303  | -0.654612 |
| C | 2.849398  | 0.329742  | 1.412849  |
| C | 2.018881  | 1.115954  | 2.230697  |
| H | 0.964723  | 1.229374  | 1.987222  |
| C | 2.547287  | 1.753410  | 3.352899  |
| H | 1.899625  | 2.359813  | 3.980277  |
| C | 3.899308  | 1.604563  | 3.674131  |
| H | 4.307427  | 2.097492  | 4.552372  |
| C | 4.723966  | 0.813344  | 2.871376  |
| H | 5.773477  | 0.688334  | 3.124114  |
| C | 4.203068  | 0.175757  | 1.743060  |
| H | 4.846563  | -0.445932 | 1.127022  |
| C | 3.653544  | -4.179826 | -0.422981 |
| H | 3.384738  | -5.170488 | -0.067342 |
| C | 2.843660  | -3.087865 | -0.110097 |
| H | 1.940922  | -3.226494 | 0.481221  |
| O | -1.450568 | -1.760973 | 1.770792  |
| C | -1.513193 | -1.101060 | 3.030501  |
| H | -1.209947 | -0.048224 | 2.954526  |
| H | -2.536313 | -1.134926 | 3.423564  |
| H | -0.841091 | -1.621713 | 3.720465  |
| B | -2.218340 | -1.156327 | 0.660653  |
| C | -3.612363 | -2.146545 | -0.923170 |
| C | -3.684261 | -1.257456 | -2.173549 |
| H | -4.670272 | -1.305038 | -2.650401 |
| H | -2.937164 | -1.612165 | -2.892277 |
| H | -3.445564 | -0.221368 | -1.929600 |
| C | -4.453497 | -1.582841 | 0.286227  |
| C | -4.796676 | -2.664451 | 1.323461  |
| H | -5.548730 | -3.369919 | 0.952071  |
| H | -5.193358 | -2.174870 | 2.218955  |
| H | -3.897735 | -3.218209 | 1.609229  |
| C | -5.714419 | -0.819413 | -0.112535 |
| H | -6.223669 | -0.453173 | 0.785617  |
| H | -6.408269 | -1.470554 | -0.657686 |
| H | -5.476146 | 0.041875  | -0.740339 |
| C | -3.948089 | -3.591015 | -1.300780 |
| H | -3.754774 | -4.273686 | -0.470430 |
| H | -3.323823 | -3.902874 | -2.145153 |
| H | -4.999130 | -3.685031 | -1.600399 |
| O | -3.540109 | -0.664098 | 0.923236  |
| O | -2.273398 | -2.113497 | -0.411136 |
| B | -1.560104 | 0.687422  | 0.185643  |
| C | -2.327297 | 2.648767  | -0.739444 |
| C | -1.964864 | 3.507956  | -1.946809 |
| H | -2.191424 | 4.563587  | -1.756092 |
| H | -2.551251 | 3.184938  | -2.813386 |
| H | -0.906895 | 3.414259  | -2.200807 |
| C | -1.531538 | 2.972255  | 0.573227  |
| C | -2.258250 | 3.872432  | 1.568788  |



|   |           |          |           |
|---|-----------|----------|-----------|
| H | -2.462508 | 4.856361 | 1.130204  |
| H | -1.632508 | 4.017865 | 2.455655  |
| H | -3.201522 | 3.427046 | 1.891396  |
| C | -0.117056 | 3.503836 | 0.309223  |
| H | 0.442159  | 3.521810 | 1.249957  |
| H | -0.139415 | 4.521508 | -0.095175 |
| H | 0.421874  | 2.860486 | -0.391232 |
| C | -3.846551 | 2.620648 | -0.530317 |
| H | -4.107986 | 1.957359 | 0.298855  |
| H | -4.319910 | 2.226975 | -1.435483 |
| H | -4.247870 | 3.621553 | -0.338137 |
| O | -1.387801 | 1.653668 | 1.174787  |
| O | -1.922445 | 1.277819 | -1.013295 |

TS4b

B3LYP-D3 SCF energy: -2146.66367028 a.u.  
 B3LYP-D3 enthalpy: -2145.938718 a.u.  
 B3LYP-D3 free energy: -2146.055502 a.u.  
 WB97XD SCF energy in solution: -2147.74074507 a.u.  
 WB97XD enthalpy in solution: -2147.015793 a.u.  
 WB97XD free energy in solution: -2147.132577 a.u.  
 Three lowest frequencies (cm<sup>-1</sup>): -280.6777 13.8267 15.5043  
 Imaginary frequency: -280.6777 cm<sup>-1</sup>

Cartesian coordinates

| ATOM | X         | Y         | Z         |
|------|-----------|-----------|-----------|
| C    | 2.504304  | -2.231646 | 1.479989  |
| C    | 1.496265  | -2.792534 | 0.688536  |
| C    | 1.805411  | -3.500494 | -0.481773 |
| C    | 3.157416  | -3.646579 | -0.828491 |
| C    | 4.167305  | -3.090834 | -0.040765 |
| C    | 3.842976  | -2.373275 | 1.114387  |
| H    | 2.240294  | -1.677176 | 2.375049  |
| H    | 0.457382  | -2.712225 | 0.991469  |
| H    | 3.418245  | -4.201684 | -1.727705 |
| H    | 5.208104  | -3.216600 | -0.329210 |
| H    | 4.624191  | -1.928044 | 1.723938  |
| C    | 0.717469  | -4.058605 | -1.395305 |
| H    | 0.618310  | -3.369193 | -2.246796 |
| H    | 1.081505  | -5.002146 | -1.824572 |
| C    | -0.634746 | -4.274820 | -0.763835 |
| C    | -1.646545 | -3.385464 | -0.774064 |
| H    | -0.777651 | -5.225791 | -0.252430 |
| H    | -2.576291 | -3.677240 | -0.284919 |
| C    | -1.654624 | -2.007137 | -1.320125 |
| H    | -0.860521 | -1.885158 | -2.089015 |
| H    | -2.572880 | -1.783261 | -1.859637 |
| B    | -2.605474 | -0.803270 | 0.204077  |
| C    | -4.217105 | 0.769662  | -0.189732 |
| C    | -4.295413 | 1.510310  | 1.155221  |
| H    | -3.942941 | 0.872137  | 1.970629  |
| H    | -5.313530 | 1.846182  | 1.381760  |
| H    | -3.639160 | 2.385243  | 1.106797  |
| C    | -4.882828 | -0.659536 | -0.146545 |

|    |           |           |           |
|----|-----------|-----------|-----------|
| C  | -5.259131 | -1.186408 | -1.538481 |
| H  | -6.146897 | -0.679963 | -1.933222 |
| H  | -5.472906 | -2.257153 | -1.463318 |
| H  | -4.441704 | -1.051641 | -2.251015 |
| C  | -6.088115 | -0.771410 | 0.786925  |
| H  | -5.809733 | -0.551127 | 1.820007  |
| H  | -6.485319 | -1.791504 | 0.755106  |
| H  | -6.885907 | -0.083958 | 0.481585  |
| C  | -4.714021 | 1.677283  | -1.312401 |
| H  | -4.508786 | 1.243872  | -2.293948 |
| H  | -4.203044 | 2.644279  | -1.254590 |
| H  | -5.791854 | 1.856653  | -1.223684 |
| O  | -3.826708 | -1.481541 | 0.390392  |
| O  | -2.833063 | 0.449322  | -0.432296 |
| Cu | -0.301404 | -0.622318 | -0.487100 |
| P  | 1.116024  | 1.086869  | -0.180260 |
| C  | 1.782054  | 1.071367  | 1.530709  |
| C  | 3.140268  | 1.228410  | 1.831393  |
| H  | 3.857807  | 1.401934  | 1.035155  |
| C  | 3.577460  | 1.135710  | 3.155336  |
| H  | 4.634027  | 1.250751  | 3.382674  |
| C  | 2.663064  | 0.890200  | 4.181507  |
| H  | 3.007036  | 0.812520  | 5.209412  |
| C  | 2.592456  | 1.113154  | -1.263582 |
| C  | 3.216189  | 2.286005  | -1.713131 |
| H  | 2.806223  | 3.256998  | -1.452521 |
| C  | 4.361590  | 2.206305  | -2.507848 |
| H  | 4.836644  | 3.118201  | -2.859791 |
| C  | 4.895234  | 0.961222  | -2.850917 |
| H  | 5.787726  | 0.904695  | -3.468490 |
| C  | 4.276652  | -0.209072 | -2.404630 |
| H  | 4.682746  | -1.182765 | -2.663399 |
| C  | 3.125075  | -0.134425 | -1.622563 |
| H  | 2.641340  | -1.044496 | -1.283516 |
| C  | 0.329628  | 2.734960  | -0.330763 |
| C  | 0.863727  | 3.872736  | 0.295942  |
| H  | 1.755573  | 3.784087  | 0.910548  |
| C  | 0.243332  | 5.112638  | 0.144000  |
| H  | 0.660565  | 5.989304  | 0.632198  |
| C  | -0.916558 | 5.224232  | -0.628383 |
| H  | -1.401111 | 6.190290  | -0.742854 |
| C  | -1.459601 | 4.092705  | -1.239974 |
| H  | -2.369678 | 4.173511  | -1.827968 |
| C  | -0.844535 | 2.848170  | -1.089224 |
| H  | -1.297844 | 1.960583  | -1.517749 |
| C  | 1.304406  | 0.739705  | 3.883842  |
| H  | 0.590318  | 0.544329  | 4.679444  |
| C  | 0.862419  | 0.823627  | 2.564066  |
| H  | -0.185260 | 0.665081  | 2.321435  |
| O  | -1.705580 | -0.778989 | 1.325827  |
| C  | -1.788841 | -1.820482 | 2.290785  |
| H  | -1.620462 | -2.803453 | 1.837255  |
| H  | -1.015026 | -1.636775 | 3.043733  |
| H  | -2.774825 | -1.823177 | 2.769540  |

MeOBpin

B3LYP-D3 SCF energy: -526.46930674 a.u.  
 B3LYP-D3 enthalpy: -526.229668 a.u.  
 B3LYP-D3 free energy: -526.280546 a.u.  
 wB97XD SCF energy in solution: -526.45597113 a.u.  
 wB97XD enthalpy in solution: -526.216332 a.u.  
 wB97XD free energy in solution: -526.267210 a.u.  
 Three lowest frequencies (cm-1): 45.5497 78.0827 111.3345

Cartesian coordinates

| ATOM | X         | Y         | Z         |
|------|-----------|-----------|-----------|
| C    | 0.719565  | 0.842283  | 0.033605  |
| C    | 0.879251  | 1.533630  | -1.326040 |
| H    | 1.933041  | 1.651705  | -1.598690 |
| H    | 0.419783  | 2.525536  | -1.274935 |
| H    | 0.376204  | 0.965466  | -2.115015 |
| C    | 1.067003  | -0.694622 | -0.012896 |
| C    | 1.364718  | -1.281891 | 1.372573  |
| H    | 2.332673  | -0.943750 | 1.757098  |
| H    | 1.380674  | -2.373204 | 1.296822  |
| H    | 0.586681  | -1.002889 | 2.090406  |
| C    | 2.167775  | -1.076146 | -0.998310 |
| H    | 2.332704  | -2.157757 | -0.965142 |
| H    | 3.108838  | -0.577676 | -0.738910 |
| H    | 1.898213  | -0.808581 | -2.022294 |
| C    | 1.437714  | 1.635773  | 1.120705  |
| H    | 1.204289  | 1.252238  | 2.116209  |
| H    | 1.125011  | 2.684202  | 1.080602  |
| H    | 2.523014  | 1.596736  | 0.973391  |
| O    | -0.181907 | -1.280880 | -0.460844 |
| O    | -0.702106 | 0.823710  | 0.332052  |
| B    | -1.176448 | -0.397320 | -0.108144 |
| O    | -2.488081 | -0.722561 | -0.202649 |
| C    | -3.484759 | 0.236862  | 0.132648  |
| H    | -3.140470 | 1.261067  | -0.048494 |
| H    | -4.366906 | 0.034705  | -0.482185 |
| H    | -3.762357 | 0.141312  | 1.189665  |

TS5

B3LYP-D3 SCF energy: -1832.36143712 a.u.  
 B3LYP-D3 enthalpy: -1831.858067 a.u.  
 B3LYP-D3 free energy: -1831.956046 a.u.  
 wB97XD SCF energy in solution: -1833.48637479 a.u.  
 wB97XD enthalpy in solution: -1832.983005 a.u.  
 wB97XD free energy in solution: -1833.080984 a.u.  
 Three lowest frequencies (cm-1): -70.8117 20.3871 21.8983  
 Imaginary frequency: -70.8117 cm-1

Cartesian coordinates

| ATOM | X         | Y         | Z         |
|------|-----------|-----------|-----------|
| Cu   | -0.224550 | 1.679099  | -0.101367 |
| B    | -2.088016 | 0.906953  | -0.065243 |
| C    | -3.528237 | -0.711185 | 0.679281  |

|   |           |           |           |
|---|-----------|-----------|-----------|
| C | -2.751155 | -2.033977 | 0.645511  |
| H | -3.406211 | -2.881433 | 0.416795  |
| H | -2.296639 | -2.203292 | 1.627018  |
| H | -1.948520 | -2.000322 | -0.096593 |
| C | -3.966610 | -0.211125 | -0.742037 |
| C | -5.118042 | 0.799615  | -0.702922 |
| H | -6.061493 | 0.326772  | -0.408832 |
| H | -5.241030 | 1.231622  | -1.700770 |
| H | -4.892862 | 1.617656  | -0.012752 |
| C | -4.249106 | -1.317727 | -1.753666 |
| H | -4.528804 | -0.873182 | -2.714310 |
| H | -5.078220 | -1.950972 | -1.416554 |
| H | -3.369486 | -1.945654 | -1.913720 |
| C | -4.643590 | -0.771911 | 1.717475  |
| H | -5.097119 | 0.209199  | 1.871559  |
| H | -4.236527 | -1.111255 | 2.675695  |
| H | -5.423316 | -1.477739 | 1.407885  |
| O | -2.785983 | 0.524510  | -1.186452 |
| O | -2.575679 | 0.317692  | 1.085729  |
| P | 1.474023  | 0.163202  | -0.083340 |
| C | 1.704051  | -0.433479 | 1.637091  |
| C | 2.953239  | -0.784852 | 2.166693  |
| H | 3.848527  | -0.692093 | 1.559177  |
| C | 3.049092  | -1.252496 | 3.479493  |
| H | 4.020782  | -1.521502 | 3.885042  |
| C | 1.902835  | -1.371937 | 4.267706  |
| H | 1.980972  | -1.734361 | 5.289191  |
| C | 0.872110  | -1.323993 | -0.979403 |
| C | -0.009277 | -1.140095 | -2.055557 |
| H | -0.338506 | -0.140189 | -2.322180 |
| C | -0.513628 | -2.241941 | -2.747988 |
| H | -1.203236 | -2.087065 | -3.572779 |
| C | -0.152873 | -3.535234 | -2.363305 |
| H | -0.555541 | -4.393177 | -2.894858 |
| C | 0.713648  | -3.726101 | -1.283450 |
| H | 0.985522  | -4.731482 | -0.973523 |
| C | 1.223424  | -2.626557 | -0.591853 |
| H | 1.877729  | -2.780618 | 0.261668  |
| C | 3.155216  | 0.501720  | -0.725322 |
| C | 3.987898  | -0.488034 | -1.269344 |
| H | 3.633635  | -1.511316 | -1.352046 |
| C | 5.268014  | -0.156935 | -1.715545 |
| H | 5.907145  | -0.926960 | -2.139134 |
| C | 5.725851  | 1.160074  | -1.621929 |
| H | 6.722325  | 1.414486  | -1.972617 |
| C | 4.898983  | 2.151095  | -1.087785 |
| H | 5.247450  | 3.178044  | -1.023321 |
| C | 3.615875  | 1.825304  | -0.647215 |
| H | 2.963615  | 2.598328  | -0.246563 |
| C | 0.656199  | -1.018285 | 3.743586  |
| H | -0.237840 | -1.102720 | 4.355363  |
| C | 0.551272  | -0.546247 | 2.435725  |
| H | -0.422085 | -0.268761 | 2.036769  |
| C | -1.672849 | 3.332488  | 0.064951  |
| O | -0.547014 | 3.822399  | 0.028792  |
| O | -2.846649 | 3.536925  | 0.145582  |

7

B3LYP-D3 SCF energy: -1832.40946322 a.u.  
B3LYP-D3 enthalpy: -1831.903745 a.u.  
B3LYP-D3 free energy: -1832.005245 a.u.  
wB97XD SCF energy in solution: -1833.54325583 a.u.  
wB97XD enthalpy in solution: -1833.037538 a.u.  
wB97XD free energy in solution: -1833.139038 a.u.  
Three lowest frequencies (cm-1): 11.1715 15.1699 18.7736

Cartesian coordinates

| ATOM | X         | Y         | Z         |
|------|-----------|-----------|-----------|
| Cu   | -0.074323 | 0.159739  | -0.739162 |
| B    | 3.952613  | 0.030322  | -0.125220 |
| C    | 6.081537  | -0.763844 | -0.133540 |
| C    | 6.326456  | -1.403689 | 1.238518  |
| H    | 7.365667  | -1.279994 | 1.561044  |
| H    | 6.105131  | -2.473313 | 1.174152  |
| H    | 5.668236  | -0.966986 | 1.995994  |
| C    | 6.086421  | 0.809322  | -0.093662 |
| C    | 6.348690  | 1.447284  | -1.463487 |
| H    | 7.389937  | 1.316114  | -1.776374 |
| H    | 6.134446  | 2.518474  | -1.401220 |
| H    | 5.694377  | 1.015357  | -2.227053 |
| C    | 6.995470  | 1.427762  | 0.964236  |
| H    | 6.914364  | 2.518692  | 0.925720  |
| H    | 8.041450  | 1.155153  | 0.781952  |
| H    | 6.717576  | 1.104845  | 1.969803  |
| C    | 6.996297  | -1.388105 | -1.183021 |
| H    | 6.728765  | -1.064286 | -2.191103 |
| H    | 6.909039  | -2.478570 | -1.144526 |
| H    | 8.042114  | -1.120935 | -0.991965 |
| O    | 4.704599  | 1.113832  | 0.248535  |
| O    | 4.700734  | -1.059285 | -0.488886 |
| P    | -2.204168 | 0.029278  | -0.127035 |
| C    | -2.402560 | -1.139156 | 1.271898  |
| C    | -3.609891 | -1.805233 | 1.535636  |
| H    | -4.463873 | -1.668266 | 0.878089  |
| C    | -3.710164 | -2.659323 | 2.634103  |
| H    | -4.646069 | -3.174497 | 2.833374  |
| C    | -2.607607 | -2.857688 | 3.469929  |
| H    | -2.687412 | -3.526781 | 4.322592  |
| C    | -2.880405 | 1.629305  | 0.460177  |
| C    | -2.387215 | 2.800706  | -0.134849 |
| H    | -1.604897 | 2.731594  | -0.887640 |
| C    | -2.884208 | 4.047314  | 0.245431  |
| H    | -2.494374 | 4.948548  | -0.219267 |
| C    | -3.870090 | 4.134253  | 1.231204  |
| H    | -4.252347 | 5.105416  | 1.533418  |
| C    | -4.354681 | 2.973152  | 1.838420  |
| H    | -5.112445 | 3.039573  | 2.614390  |
| C    | -3.862304 | 1.723880  | 1.457633  |
| H    | -4.230608 | 0.825892  | 1.944763  |
| C    | -3.377147 | -0.550050 | -1.411873 |

|   |           |           |           |
|---|-----------|-----------|-----------|
| C | -4.724393 | -0.161562 | -1.452224 |
| H | -5.108549 | 0.545766  | -0.722882 |
| C | -5.570760 | -0.672482 | -2.437937 |
| H | -6.612668 | -0.365116 | -2.465494 |
| C | -5.080037 | -1.570868 | -3.388359 |
| H | -5.740756 | -1.964623 | -4.155848 |
| C | -3.736795 | -1.954016 | -3.358908 |
| H | -3.348588 | -2.643698 | -4.103147 |
| C | -2.887118 | -1.441380 | -2.378912 |
| H | -1.836919 | -1.725114 | -2.363538 |
| C | -1.401280 | -2.207421 | 3.201928  |
| H | -0.537669 | -2.370918 | 3.840303  |
| C | -1.290188 | -1.352106 | 2.103970  |
| H | -0.339263 | -0.869975 | 1.884856  |
| C | 2.364407  | 0.031189  | -0.113072 |
| O | 1.773876  | 0.248899  | -1.247270 |
| O | 1.743986  | -0.170826 | 0.954809  |

TS6

B3LYP-D3 SCF energy: -1832.37990163 a.u.  
 B3LYP-D3 enthalpy: -1831.877295 a.u.  
 B3LYP-D3 free energy: -1831.975530 a.u.  
 wB97XD SCF energy in solution: -1833.50658174 a.u.  
 wB97XD enthalpy in solution: -1833.003975 a.u.  
 wB97XD free energy in solution: -1833.102210 a.u.  
 Three lowest frequencies (cm-1): -218.2912 8.7296 15.5259  
 Imaginary frequency: -218.2912 cm-1

Cartesian coordinates

| ATOM | X         | Y         | Z         |
|------|-----------|-----------|-----------|
| Cu   | 0.290381  | -0.886272 | 0.860280  |
| B    | 3.142777  | -1.212411 | 0.541288  |
| C    | 3.979482  | 0.496767  | -0.764354 |
| C    | 4.906912  | -0.217097 | -1.759310 |
| H    | 5.769340  | 0.401772  | -2.031216 |
| H    | 4.340422  | -0.443504 | -2.668488 |
| H    | 5.270076  | -1.159955 | -1.339999 |
| C    | 4.585111  | 0.566233  | 0.681878  |
| C    | 3.847570  | 1.580625  | 1.572947  |
| H    | 4.091622  | 2.616458  | 1.310068  |
| H    | 4.137587  | 1.406549  | 2.613558  |
| H    | 2.763633  | 1.443242  | 1.495682  |
| C    | 6.091231  | 0.811886  | 0.738343  |
| H    | 6.420996  | 0.842676  | 1.782129  |
| H    | 6.351393  | 1.768291  | 0.268629  |
| H    | 6.639813  | 0.011139  | 0.237136  |
| C    | 3.533693  | 1.839209  | -1.338527 |
| H    | 2.754274  | 2.298203  | -0.726420 |
| H    | 3.134902  | 1.694342  | -2.349327 |
| H    | 4.380652  | 2.531934  | -1.405488 |
| O    | 4.311931  | -0.750559 | 1.185101  |
| O    | 2.823815  | -0.338576 | -0.557173 |
| P    | -1.600806 | -0.019208 | 0.107975  |
| C    | -1.323293 | 1.547390  | -0.797674 |

|   |           |           |           |
|---|-----------|-----------|-----------|
| C | -2.301967 | 2.549079  | -0.888977 |
| H | -3.252899 | 2.430388  | -0.377509 |
| C | -2.048567 | 3.707132  | -1.624853 |
| H | -2.808144 | 4.481307  | -1.690750 |
| C | -0.819602 | 3.872312  | -2.268727 |
| H | -0.623113 | 4.776130  | -2.838969 |
| C | -2.443340 | -1.136022 | -1.074193 |
| C | -2.258064 | -2.518215 | -0.914518 |
| H | -1.604270 | -2.888813 | -0.127904 |
| C | -2.896319 | -3.416048 | -1.770386 |
| H | -2.743326 | -4.483691 | -1.642377 |
| C | -3.715721 | -2.939551 | -2.796258 |
| H | -4.206747 | -3.638358 | -3.467807 |
| C | -3.893224 | -1.564333 | -2.968543 |
| H | -4.520550 | -1.192521 | -3.774001 |
| C | -3.258479 | -0.662624 | -2.113396 |
| H | -3.384461 | 0.405744  | -2.262467 |
| C | -2.835969 | 0.367840  | 1.403930  |
| C | -4.219603 | 0.320459  | 1.178055  |
| H | -4.603484 | 0.008467  | 0.211110  |
| C | -5.105906 | 0.659739  | 2.201704  |
| H | -6.176741 | 0.617592  | 2.022652  |
| C | -4.619577 | 1.045426  | 3.453244  |
| H | -5.312715 | 1.304894  | 4.248618  |
| C | -3.242665 | 1.085690  | 3.686137  |
| H | -2.860995 | 1.373531  | 4.661555  |
| C | -2.353883 | 0.742763  | 2.667632  |
| H | -1.281656 | 0.756381  | 2.851855  |
| C | 0.161244  | 2.883095  | -2.168620 |
| H | 1.123427  | 3.016796  | -2.653022 |
| C | -0.082005 | 1.723266  | -1.431325 |
| H | 0.695606  | 0.967238  | -1.336129 |
| C | 2.690113  | -2.743812 | 0.518782  |
| O | 1.924548  | -1.658397 | 1.349693  |
| O | 2.329640  | -3.865147 | 0.419474  |

LCu-OBpin

B3LYP-D3 SCF energy: -1719.10989909 a.u.  
 B3LYP-D3 enthalpy: -1718.615710 a.u.  
 B3LYP-D3 free energy: -1718.710321 a.u.  
 wB97XD SCF energy in solution: -1720.24333766 a.u.  
 wB97XD enthalpy in solution: -1719.749149 a.u.  
 wB97XD free energy in solution: -1719.843760 a.u.  
 Three lowest frequencies (cm<sup>-1</sup>): 9.3188 15.8627 30.1940

Cartesian coordinates

| ATOM | X         | Y         | Z         |
|------|-----------|-----------|-----------|
| B    | -2.953045 | 0.301558  | -1.381163 |
| C    | -4.100859 | -0.367418 | 0.511699  |
| C    | -4.145345 | -1.901149 | 0.445548  |
| H    | -5.068580 | -2.305684 | 0.874690  |
| H    | -3.295107 | -2.303202 | 1.006634  |
| H    | -4.061274 | -2.242940 | -0.590811 |
| C    | -5.080181 | 0.315545  | -0.514738 |

|    |           |           |           |
|----|-----------|-----------|-----------|
| C  | -5.375870 | 1.780715  | -0.159244 |
| H  | -6.026575 | 1.868561  | 0.718109  |
| H  | -5.872228 | 2.254997  | -1.011396 |
| H  | -4.446404 | 2.325220  | 0.037124  |
| C  | -6.385151 | -0.439849 | -0.757607 |
| H  | -6.997157 | 0.106619  | -1.482711 |
| H  | -6.959902 | -0.538057 | 0.171174  |
| H  | -6.196981 | -1.436750 | -1.162695 |
| C  | -4.247631 | 0.100975  | 1.958585  |
| H  | -4.047012 | 1.171159  | 2.050419  |
| H  | -3.533767 | -0.434831 | 2.595344  |
| H  | -5.256327 | -0.102153 | 2.336597  |
| O  | -4.307503 | 0.316247  | -1.727293 |
| O  | -2.817881 | 0.045910  | 0.012656  |
| P  | 1.539754  | 0.047285  | -0.201297 |
| C  | 2.097227  | -1.696548 | -0.101440 |
| C  | 2.729294  | -2.233194 | 1.030149  |
| H  | 2.877007  | -1.618846 | 1.913439  |
| C  | 3.152639  | -3.563196 | 1.029748  |
| H  | 3.638347  | -3.974087 | 1.910644  |
| C  | 2.945896  | -4.365999 | -0.094841 |
| H  | 3.272664  | -5.402234 | -0.089808 |
| C  | 3.013882  | 1.004804  | -0.720292 |
| C  | 2.791384  | 2.221301  | -1.383893 |
| H  | 1.772414  | 2.535599  | -1.599583 |
| C  | 3.868060  | 3.018413  | -1.772189 |
| H  | 3.686463  | 3.958242  | -2.285896 |
| C  | 5.175423  | 2.601342  | -1.510161 |
| H  | 6.014788  | 3.218517  | -1.818600 |
| C  | 5.404082  | 1.385151  | -0.861939 |
| H  | 6.420590  | 1.054419  | -0.666849 |
| C  | 4.328946  | 0.586690  | -0.468020 |
| H  | 4.512993  | -0.364141 | 0.023782  |
| C  | 1.204527  | 0.559160  | 1.528334  |
| C  | 2.214278  | 1.006708  | 2.394571  |
| H  | 3.237286  | 1.097385  | 2.040330  |
| C  | 1.902633  | 1.354674  | 3.709544  |
| H  | 2.687600  | 1.703080  | 4.375413  |
| C  | 0.584521  | 1.264304  | 4.165272  |
| H  | 0.344512  | 1.541546  | 5.188294  |
| C  | -0.424295 | 0.831656  | 3.301911  |
| H  | -1.453991 | 0.775835  | 3.644420  |
| C  | -0.122315 | 0.482226  | 1.984763  |
| H  | -0.922283 | 0.171221  | 1.315591  |
| C  | 2.307085  | -3.840363 | -1.220420 |
| H  | 2.132025  | -4.465118 | -2.091703 |
| C  | 1.879106  | -2.512736 | -1.222119 |
| H  | 1.361946  | -2.106499 | -2.088738 |
| Cu | -0.275613 | 0.307951  | -1.437278 |
| O  | -1.932539 | 0.488497  | -2.203641 |

TS7

B3LYP-D3 SCF energy: -2518.12202499 a.u.  
 B3LYP-D3 enthalpy: -2517.243058 a.u.



B3LYP-D3 free energy: -2517.375647 a.u.  
 wB97XD SCF energy in solution: -2519.17950463 a.u.  
 wB97XD enthalpy in solution: -2518.300538 a.u.  
 wB97XD free energy in solution: -2518.433127 a.u.  
 Three lowest frequencies (cm-1): -270.6300 18.4888 21.2869  
 Imaginary frequency: -270.6300 cm-1

Cartesian coordinates

| ATOM | X         | Y         | Z         |
|------|-----------|-----------|-----------|
| C    | 1.094122  | -3.367914 | 0.229522  |
| C    | 0.337163  | -2.769687 | -0.782077 |
| C    | 0.590338  | -3.049547 | -2.131843 |
| C    | 1.624057  | -3.946912 | -2.441063 |
| C    | 2.389952  | -4.538322 | -1.434442 |
| C    | 2.127103  | -4.248579 | -0.092432 |
| H    | 0.875338  | -3.134473 | 1.265821  |
| H    | -0.468498 | -2.094246 | -0.516110 |
| H    | 1.830829  | -4.180500 | -3.483837 |
| H    | 3.187248  | -5.229373 | -1.697663 |
| H    | 2.721338  | -4.704040 | 0.695093  |
| C    | -0.184622 | -2.362507 | -3.250511 |
| H    | 0.393165  | -1.483417 | -3.568784 |
| H    | -0.200269 | -3.033586 | -4.120877 |
| C    | -1.591232 | -1.946955 | -2.902602 |
| C    | -1.994719 | -0.691957 | -2.630068 |
| H    | -2.326155 | -2.750725 | -2.867793 |
| H    | -3.046399 | -0.551057 | -2.382731 |
| C    | -1.173490 | 0.540898  | -2.539480 |
| H    | -0.234880 | 0.438264  | -3.125692 |
| H    | -1.672268 | 1.395599  | -2.991171 |
| B    | -1.890240 | 1.424218  | -0.697310 |
| C    | -1.993673 | 3.658504  | -0.179164 |
| C    | -2.353544 | 3.635422  | 1.314503  |
| H    | -2.862159 | 2.703047  | 1.576642  |
| H    | -2.995319 | 4.478104  | 1.594799  |
| H    | -1.427104 | 3.690970  | 1.895018  |
| C    | -3.203634 | 3.272109  | -1.107311 |
| C    | -3.002020 | 3.726419  | -2.560476 |
| H    | -3.145227 | 4.807365  | -2.668067 |
| H    | -3.732848 | 3.213747  | -3.193661 |
| H    | -2.000733 | 3.473646  | -2.919418 |
| C    | -4.567708 | 3.740446  | -0.602318 |
| H    | -4.802908 | 3.291763  | 0.365243  |
| H    | -5.346067 | 3.438430  | -1.310779 |
| H    | -4.596041 | 4.832357  | -0.505259 |
| C    | -1.305133 | 4.974821  | -0.529009 |
| H    | -0.880563 | 4.946371  | -1.535707 |
| H    | -0.492864 | 5.164593  | 0.179282  |
| H    | -2.012129 | 5.810607  | -0.470061 |
| O    | -3.182658 | 1.832927  | -1.059845 |
| O    | -1.078193 | 2.567657  | -0.420806 |
| Cu   | 0.322594  | 0.541999  | -1.086098 |
| P    | 2.154882  | 0.604214  | 0.214164  |
| C    | 1.987105  | -0.449128 | 1.705947  |
| C    | 3.053542  | -1.179465 | 2.248980  |
| H    | 4.037504  | -1.129110 | 1.792043  |

|   |           |           |           |
|---|-----------|-----------|-----------|
| C | 2.842183  | -1.996517 | 3.360919  |
| H | 3.669591  | -2.566404 | 3.775525  |
| C | 1.568893  | -2.093386 | 3.930240  |
| H | 1.406163  | -2.742539 | 4.786707  |
| C | 3.712541  | 0.041721  | -0.575647 |
| C | 4.941966  | 0.699188  | -0.428163 |
| H | 5.009311  | 1.608596  | 0.160658  |
| C | 6.086766  | 0.187825  | -1.044570 |
| H | 7.035000  | 0.706444  | -0.930238 |
| C | 6.015236  | -0.982595 | -1.802831 |
| H | 6.908858  | -1.377653 | -2.278753 |
| C | 4.791780  | -1.641291 | -1.950946 |
| H | 4.721224  | -2.554240 | -2.535236 |
| C | 3.644451  | -1.128759 | -1.348443 |
| H | 2.698431  | -1.644166 | -1.471508 |
| C | 2.507301  | 2.281061  | 0.864293  |
| C | 3.266738  | 2.482121  | 2.027963  |
| H | 3.629282  | 1.627384  | 2.592398  |
| C | 3.548764  | 3.776039  | 2.466177  |
| H | 4.135639  | 3.924762  | 3.368605  |
| C | 3.074337  | 4.877227  | 1.747766  |
| H | 3.295259  | 5.884778  | 2.089907  |
| C | 2.305764  | 4.682098  | 0.598525  |
| H | 1.922969  | 5.535772  | 0.046411  |
| C | 2.012950  | 3.388895  | 0.161037  |
| H | 1.371473  | 3.234929  | -0.700965 |
| C | 0.504026  | -1.369679 | 3.387279  |
| H | -0.497600 | -1.464269 | 3.794767  |
| C | 0.710661  | -0.548700 | 2.278966  |
| H | -0.126566 | -0.023386 | 1.832515  |
| O | -1.761838 | 0.342262  | 0.232288  |
| B | -2.604252 | -0.660896 | 0.558443  |
| O | -2.198324 | -1.640474 | 1.451362  |
| O | -3.895308 | -0.837973 | 0.115143  |
| C | -3.221758 | -2.667946 | 1.447971  |
| C | -4.486335 | -1.876480 | 0.933759  |
| C | -2.765666 | -3.760924 | 0.475343  |
| C | -3.339078 | -3.232777 | 2.860882  |
| C | -5.250363 | -1.166373 | 2.058730  |
| C | -5.446420 | -2.687054 | 0.068124  |
| H | -3.468998 | -4.600025 | 0.457049  |
| H | -1.784748 | -4.131712 | 0.785713  |
| H | -2.661270 | -3.363124 | -0.537968 |
| H | -3.524470 | -2.444404 | 3.594255  |
| H | -2.403797 | -3.734355 | 3.130767  |
| H | -4.150436 | -3.966924 | 2.921056  |
| H | -4.567390 | -0.584920 | 2.686847  |
| H | -5.792499 | -1.874875 | 2.693985  |
| H | -5.969923 | -0.473964 | 1.611739  |
| H | -4.950986 | -3.059787 | -0.830945 |
| H | -6.282146 | -2.053398 | -0.245483 |
| H | -5.850846 | -3.537863 | 0.628268  |

8a

B3LYP-D3 SCF energy: -1620.19728205 a.u.  
B3LYP-D3 enthalpy: -1619.711916 a.u.  
B3LYP-D3 free energy: -1619.802286 a.u.  
wB97XD SCF energy in solution: -1621.30938814 a.u.  
wB97XD enthalpy in solution: -1620.824022 a.u.  
wB97XD free energy in solution: -1620.914392 a.u.  
Three lowest frequencies (cm<sup>-1</sup>): 16.0207 24.3072 29.1585

Cartesian coordinates

| ATOM | X         | Y         | Z         |
|------|-----------|-----------|-----------|
| C    | 2.302977  | -1.870322 | -0.915787 |
| C    | 2.811445  | -0.606085 | -1.228255 |
| C    | 3.769260  | 0.009138  | -0.406275 |
| C    | 4.208240  | -0.686284 | 0.729000  |
| C    | 3.705152  | -1.949532 | 1.042030  |
| C    | 2.745507  | -2.546031 | 0.221866  |
| H    | 1.560383  | -2.330389 | -1.561453 |
| H    | 2.473647  | -0.089055 | -2.123197 |
| H    | 4.955818  | -0.227802 | 1.373398  |
| H    | 4.058307  | -2.467155 | 1.930328  |
| H    | 2.343169  | -3.524232 | 0.469385  |
| C    | 4.290954  | 1.403375  | -0.711720 |
| H    | 5.357385  | 1.450363  | -0.452390 |
| H    | 4.221551  | 1.586530  | -1.790922 |
| C    | 3.535217  | 2.476307  | 0.044712  |
| C    | 2.455560  | 3.135797  | -0.433035 |
| H    | 3.882244  | 2.688707  | 1.054966  |
| H    | 1.997612  | 3.866096  | 0.239004  |
| C    | 1.752629  | 2.957128  | -1.722175 |
| H    | 1.291260  | 3.884814  | -2.077558 |
| H    | 2.377047  | 2.533212  | -2.518151 |
| P    | -0.993392 | 0.181669  | -0.113887 |
| C    | -0.196136 | -0.643779 | 1.315695  |
| C    | -0.615712 | -1.883308 | 1.821546  |
| H    | -1.412468 | -2.431834 | 1.328189  |
| C    | -0.000268 | -2.423176 | 2.951275  |
| H    | -0.328382 | -3.384988 | 3.336562  |
| C    | 1.036686  | -1.731258 | 3.582163  |
| H    | 1.516825  | -2.154847 | 4.460262  |
| C    | -2.482856 | 1.000840  | 0.582175  |
| C    | -3.020721 | 2.074159  | -0.146149 |
| H    | -2.526095 | 2.403744  | -1.057418 |
| C    | -4.172287 | 2.722620  | 0.299571  |
| H    | -4.580347 | 3.552010  | -0.271494 |
| C    | -4.789759 | 2.313852  | 1.484332  |
| H    | -5.682798 | 2.823188  | 1.836172  |
| C    | -4.250725 | 1.257819  | 2.222598  |
| H    | -4.722485 | 0.945112  | 3.150320  |
| C    | -3.101322 | 0.602539  | 1.776384  |
| H    | -2.680548 | -0.208979 | 2.362601  |
| C    | -1.673231 | -1.153064 | -1.173989 |
| C    | -2.851167 | -1.852139 | -0.869439 |
| H    | -3.425669 | -1.587105 | 0.013797  |
| C    | -3.297941 | -2.873872 | -1.708429 |
| H    | -4.210620 | -3.411216 | -1.465245 |

|    |           |           |           |
|----|-----------|-----------|-----------|
| C  | -2.579566 | -3.199705 | -2.862048 |
| H  | -2.931395 | -3.993996 | -3.514724 |
| C  | -1.418779 | -2.492913 | -3.184106 |
| H  | -0.866952 | -2.730667 | -4.089312 |
| C  | -0.971322 | -1.469938 | -2.346997 |
| H  | -0.079575 | -0.903225 | -2.602528 |
| C  | 1.470304  | -0.507303 | 3.070338  |
| H  | 2.298356  | 0.018651  | 3.536079  |
| C  | 0.863901  | 0.033729  | 1.937095  |
| H  | 1.238591  | 0.964560  | 1.517208  |
| Cu | 0.400682  | 1.634893  | -1.158959 |

8b

B3LYP-D3 SCF energy: -1620.18595334 a.u.  
 B3LYP-D3 enthalpy: -1619.701298 a.u.  
 B3LYP-D3 free energy: -1619.796813 a.u.  
 WB97XD SCF energy in solution: -1621.30122353 a.u.  
 WB97XD enthalpy in solution: -1620.816568 a.u.  
 WB97XD free energy in solution: -1620.912083 a.u.  
 Three lowest frequencies (cm<sup>-1</sup>): 7.2439 15.3857 19.1153

Cartesian coordinates

| ATOM | X         | Y         | Z         |
|------|-----------|-----------|-----------|
| C    | 4.033241  | -1.600914 | -1.259379 |
| C    | 4.135079  | -0.258279 | -0.888026 |
| C    | 3.674173  | 0.183623  | 0.360328  |
| C    | 3.121302  | -0.767791 | 1.231625  |
| C    | 3.013774  | -2.111266 | 0.865767  |
| C    | 3.466892  | -2.532955 | -0.386000 |
| H    | 4.398371  | -1.920687 | -2.232751 |
| H    | 4.571799  | 0.463223  | -1.574971 |
| H    | 2.769853  | -0.441322 | 2.208626  |
| H    | 2.577266  | -2.828313 | 1.557058  |
| H    | 3.377616  | -3.575568 | -0.678045 |
| C    | 3.690226  | 1.654338  | 0.717519  |
| H    | 3.556232  | 1.759823  | 1.802445  |
| H    | 4.681311  | 2.078555  | 0.483663  |
| C    | 2.567200  | 2.434069  | -0.007636 |
| C    | 2.313747  | 3.782241  | 0.550128  |
| H    | 2.815892  | 2.507214  | -1.078597 |
| H    | 2.273172  | 3.826749  | 1.643601  |
| C    | 2.093044  | 4.922811  | -0.127112 |
| H    | 1.858055  | 5.854885  | 0.380158  |
| H    | 2.124460  | 4.951518  | -1.215595 |
| P    | -0.949978 | 0.052689  | -0.030712 |
| C    | -0.654064 | -1.501526 | -0.955944 |
| C    | 0.426224  | -1.538766 | -1.848666 |
| H    | 1.079896  | -0.675366 | -1.940790 |
| C    | 0.690025  | -2.695213 | -2.584017 |
| H    | 1.537509  | -2.717079 | -3.262770 |
| C    | -0.115721 | -3.823591 | -2.425712 |
| H    | 0.093110  | -4.725636 | -2.994686 |
| C    | -1.564498 | -0.528731 | 1.598010  |
| C    | -2.908621 | -0.473970 | 1.988857  |

|    |           |           |           |
|----|-----------|-----------|-----------|
| H  | -3.655942 | -0.067263 | 1.314229  |
| C  | -3.290125 | -0.940973 | 3.249621  |
| H  | -4.334304 | -0.893164 | 3.546941  |
| C  | -2.336799 | -1.465740 | 4.123556  |
| H  | -2.636823 | -1.826654 | 5.103548  |
| C  | -0.993918 | -1.521853 | 3.737800  |
| H  | -0.247582 | -1.926231 | 4.416276  |
| C  | -0.607362 | -1.050627 | 2.484730  |
| H  | 0.436772  | -1.090527 | 2.184632  |
| C  | -2.381759 | 0.871907  | -0.829969 |
| C  | -2.441882 | 2.272371  | -0.747215 |
| H  | -1.637714 | 2.816067  | -0.255651 |
| C  | -3.518126 | 2.965610  | -1.302312 |
| H  | -3.554554 | 4.049209  | -1.233905 |
| C  | -4.536407 | 2.266879  | -1.954401 |
| H  | -5.371390 | 2.806387  | -2.393140 |
| C  | -4.475873 | 0.874138  | -2.053082 |
| H  | -5.262290 | 0.329865  | -2.569039 |
| C  | -3.403902 | 0.177071  | -1.494255 |
| H  | -3.357146 | -0.903949 | -1.584902 |
| C  | -1.180812 | -3.801165 | -1.519720 |
| H  | -1.798372 | -4.684754 | -1.382406 |
| C  | -1.447710 | -2.647628 | -0.783143 |
| H  | -2.260871 | -2.640890 | -0.062227 |
| Cu | 0.896940  | 1.373074  | 0.063133  |

(Bpin)<sub>2</sub>O

B3LYP-D3 SCF energy: -897.91417901 a.u.  
 B3LYP-D3 enthalpy: -897.521211 a.u.  
 B3LYP-D3 free energy: -897.591117 a.u.  
 wb97XD SCF energy in solution: -897.88660980 a.u.  
 wb97XD enthalpy in solution: -897.493642 a.u.  
 wb97XD free energy in solution: -897.563548 a.u.  
 Three lowest frequencies (cm<sup>-1</sup>): 20.7377 21.6505 27.8022

Cartesian coordinates

| ATOM | X         | Y         | Z         |
|------|-----------|-----------|-----------|
| C    | -3.444121 | -0.518188 | 0.217215  |
| C    | -4.120011 | -1.287055 | -0.924421 |
| H    | -5.029244 | -0.782991 | -1.267863 |
| H    | -4.387791 | -2.286071 | -0.567643 |
| H    | -3.440257 | -1.401736 | -1.774789 |
| C    | -2.753749 | 0.817482  | -0.261091 |
| C    | -2.504498 | 1.810969  | 0.880459  |
| H    | -3.435231 | 2.271853  | 1.227189  |
| H    | -1.835835 | 2.598436  | 0.520136  |
| H    | -2.017696 | 1.319004  | 1.728332  |
| C    | -3.438556 | 1.512807  | -1.433242 |
| H    | -2.884326 | 2.418576  | -1.699341 |
| H    | -4.461039 | 1.803078  | -1.166162 |
| H    | -3.475108 | 0.868715  | -2.314427 |
| C    | -4.401184 | -0.362264 | 1.394835  |
| H    | -3.890975 | 0.036268  | 2.274414  |
| H    | -4.820145 | -1.337881 | 1.660802  |

|   |           |           |           |
|---|-----------|-----------|-----------|
| H | -5.229282 | 0.306619  | 1.133961  |
| O | -1.449494 | 0.348157  | -0.693267 |
| O | -2.308588 | -1.317525 | 0.646192  |
| B | 1.209777  | -0.820541 | 0.006928  |
| C | 3.444123  | -0.518205 | -0.217341 |
| C | 4.120363  | -1.286967 | 0.924129  |
| H | 5.029706  | -0.782872 | 1.267236  |
| H | 4.388030  | -2.285993 | 0.567302  |
| H | 3.440857  | -1.401589 | 1.774699  |
| C | 2.753792  | 0.817437  | 0.261108  |
| C | 2.504296  | 1.810969  | -0.880334 |
| H | 3.434952  | 2.271800  | -1.227331 |
| H | 1.835817  | 2.598490  | -0.519771 |
| H | 2.017131  | 1.319133  | -1.728072 |
| C | 3.438794  | 1.512743  | 1.433169  |
| H | 2.884258  | 2.418212  | 1.699627  |
| H | 4.461047  | 1.803491  | 1.165714  |
| H | 3.476013  | 0.868531  | 2.314240  |
| C | 4.400786  | -0.362155 | -1.395279 |
| H | 3.890103  | 0.036106  | -2.274703 |
| H | 4.819999  | -1.337645 | -1.661294 |
| H | 5.228757  | 0.307045  | -1.134802 |
| O | 1.449620  | 0.348095  | 0.693516  |
| O | 2.308469  | -1.317717 | -0.645953 |
| B | -1.209754 | -0.820482 | -0.006592 |
| O | -0.000016 | -1.449622 | 0.000216  |

TS8

B3LYP-D3 SCF energy: -1808.76983593 a.u.  
 B3LYP-D3 enthalpy: -1808.269251 a.u.  
 B3LYP-D3 free energy: -1808.372602 a.u.  
 wB97XD SCF energy in solution: -1809.87361000 a.u.  
 wB97XD enthalpy in solution: -1809.373025 a.u.  
 wB97XD free energy in solution: -1809.476376 a.u.  
 Three lowest frequencies (cm<sup>-1</sup>): -223.1149 3.0384 8.9858  
 Imaginary frequency: -223.1149 cm<sup>-1</sup>

Cartesian coordinates

| ATOM | X        | Y         | Z         |
|------|----------|-----------|-----------|
| C    | 6.649557 | 0.902658  | -0.299136 |
| C    | 5.733889 | -0.133774 | -0.118571 |
| C    | 4.436239 | 0.124340  | 0.344035  |
| C    | 4.080751 | 1.451180  | 0.615359  |
| C    | 4.992155 | 2.494431  | 0.434788  |
| C    | 6.282375 | 2.222792  | -0.022567 |
| H    | 7.651287 | 0.681000  | -0.658947 |
| H    | 6.021002 | -1.157107 | -0.347587 |
| H    | 3.073900 | 1.670302  | 0.967109  |
| H    | 4.691834 | 3.517618  | 0.647101  |
| H    | 6.994481 | 3.031078  | -0.166699 |
| C    | 3.443340 | -1.007328 | 0.563736  |
| H    | 3.731000 | -1.564045 | 1.466170  |
| H    | 2.457874 | -0.570296 | 0.780115  |
| C    | 3.287180 | -1.982236 | -0.584933 |

|    |           |           |           |
|----|-----------|-----------|-----------|
| C  | 2.754548  | -1.588751 | -1.805001 |
| H  | 3.871346  | -2.895970 | -0.557682 |
| H  | 2.707888  | -2.360790 | -2.576190 |
| C  | 2.157881  | -0.324555 | -2.113632 |
| H  | 2.621807  | 0.541723  | -1.632619 |
| H  | 1.965237  | -0.153061 | -3.174821 |
| P  | -1.581246 | 0.188433  | -0.153670 |
| C  | -2.255081 | 1.797283  | -0.721140 |
| C  | -3.079354 | 2.604456  | 0.078121  |
| H  | -3.324435 | 2.295260  | 1.090247  |
| C  | -3.574279 | 3.810256  | -0.419949 |
| H  | -4.209142 | 4.432159  | 0.205376  |
| C  | -3.250007 | 4.220366  | -1.716103 |
| H  | -3.633715 | 5.161929  | -2.099501 |
| C  | -2.959155 | -1.011468 | -0.330870 |
| C  | -2.641915 | -2.374803 | -0.204654 |
| H  | -1.613565 | -2.672441 | -0.018574 |
| C  | -3.644778 | -3.338072 | -0.308202 |
| H  | -3.391686 | -4.389816 | -0.206488 |
| C  | -4.966522 | -2.953488 | -0.550241 |
| H  | -5.745207 | -3.706370 | -0.637995 |
| C  | -5.284241 | -1.600787 | -0.685356 |
| H  | -6.309918 | -1.297754 | -0.878236 |
| C  | -4.286032 | -0.629901 | -0.575336 |
| H  | -4.541578 | 0.419485  | -0.684175 |
| C  | -1.367008 | 0.380066  | 1.657793  |
| C  | -2.387660 | 0.109135  | 2.580357  |
| H  | -3.351529 | -0.251405 | 2.232286  |
| C  | -2.161363 | 0.288349  | 3.946335  |
| H  | -2.955445 | 0.074115  | 4.656559  |
| C  | -0.917503 | 0.733751  | 4.400199  |
| H  | -0.743141 | 0.866177  | 5.464488  |
| C  | 0.105890  | 0.997440  | 3.486204  |
| H  | 1.079428  | 1.330902  | 3.834710  |
| C  | -0.116945 | 0.817272  | 2.121806  |
| H  | 0.683360  | 1.003726  | 1.409809  |
| C  | -2.424004 | 3.425641  | -2.513998 |
| H  | -2.160715 | 3.746652  | -3.518009 |
| C  | -1.923937 | 2.221371  | -2.016774 |
| H  | -1.263421 | 1.608086  | -2.625941 |
| Cu | 0.381173  | -0.373319 | -1.145485 |
| C  | 1.462155  | -3.134980 | -0.017130 |
| O  | 1.764782  | -4.274989 | -0.165439 |
| O  | 0.670301  | -2.285670 | 0.315783  |

TS9

B3LYP-D3 SCF energy: -1808.77685627 a.u.  
 B3LYP-D3 enthalpy: -1808.276305 a.u.  
 B3LYP-D3 free energy: -1808.375132 a.u.  
 wB97XD SCF energy in solution: -1809.87571429 a.u.  
 wB97XD enthalpy in solution: -1809.375163 a.u.  
 wB97XD free energy in solution: -1809.473990 a.u.  
 Three lowest frequencies (cm-1): -247.5482 19.1983 23.8841  
 Imaginary frequency: -247.5482 cm-1

Cartesian coordinates

| ATOM | X         | Y         | Z         |
|------|-----------|-----------|-----------|
| C    | 2.614419  | -3.712157 | -0.378838 |
| C    | 3.299913  | -2.549942 | -0.746474 |
| C    | 3.153891  | -1.366482 | -0.011583 |
| C    | 2.301342  | -1.380842 | 1.104748  |
| C    | 1.611136  | -2.536030 | 1.475731  |
| C    | 1.766150  | -3.708608 | 0.731645  |
| H    | 2.744366  | -4.621626 | -0.960719 |
| H    | 3.956326  | -2.558730 | -1.613948 |
| H    | 2.173131  | -0.468791 | 1.683328  |
| H    | 0.948349  | -2.513162 | 2.336121  |
| H    | 1.228709  | -4.610235 | 1.012779  |
| C    | 3.820685  | -0.075342 | -0.443208 |
| H    | 3.972864  | 0.547648  | 0.445280  |
| H    | 4.821006  | -0.289716 | -0.852488 |
| C    | 2.966995  | 0.696172  | -1.458478 |
| C    | 3.195963  | 2.103880  | -1.644862 |
| H    | 2.833553  | 0.148724  | -2.397900 |
| H    | 2.730995  | 2.519680  | -2.542968 |
| C    | 3.812960  | 3.001067  | -0.806427 |
| H    | 3.930021  | 4.036195  | -1.105645 |
| H    | 4.441265  | 2.667859  | 0.016024  |
| P    | -1.017550 | 0.136682  | -0.146259 |
| C    | -1.191606 | -0.444364 | 1.587411  |
| C    | -1.927880 | -1.584808 | 1.936932  |
| H    | -2.444084 | -2.154762 | 1.170610  |
| C    | -1.979285 | -2.005129 | 3.267810  |
| H    | -2.547032 | -2.893888 | 3.530105  |
| C    | -1.296669 | -1.292572 | 4.256172  |
| H    | -1.330974 | -1.626505 | 5.289648  |
| C    | -2.329437 | 1.397142  | -0.358835 |
| C    | -2.110770 | 2.406553  | -1.308804 |
| H    | -1.175751 | 2.422789  | -1.865032 |
| C    | -3.078291 | 3.386601  | -1.530896 |
| H    | -2.899806 | 4.165919  | -2.266528 |
| C    | -4.267464 | 3.371290  | -0.797796 |
| H    | -5.018292 | 4.138814  | -0.964662 |
| C    | -4.486735 | 2.376200  | 0.158343  |
| H    | -5.407235 | 2.369057  | 0.735819  |
| C    | -3.522245 | 1.391979  | 0.379756  |
| H    | -3.689729 | 0.627001  | 1.132817  |
| C    | -1.535186 | -1.302128 | -1.159556 |
| C    | -2.861213 | -1.541838 | -1.547806 |
| H    | -3.642825 | -0.835656 | -1.282865 |
| C    | -3.177636 | -2.686150 | -2.283007 |
| H    | -4.205914 | -2.864511 | -2.586135 |
| C    | -2.176765 | -3.597824 | -2.628785 |
| H    | -2.427279 | -4.487637 | -3.200253 |
| C    | -0.854178 | -3.360613 | -2.246264 |
| H    | -0.069089 | -4.062874 | -2.512223 |
| C    | -0.530533 | -2.213946 | -1.522148 |
| H    | 0.500483  | -2.027616 | -1.236011 |
| C    | -0.564208 | -0.152502 | 3.912569  |
| H    | -0.026645 | 0.401781  | 4.676998  |



|    |           |          |           |
|----|-----------|----------|-----------|
| C  | -0.507217 | 0.269436 | 2.584470  |
| H  | 0.082964  | 1.140788 | 2.315006  |
| Cu | 1.086857  | 0.753832 | -0.689358 |
| C  | 2.086794  | 3.493078 | 0.790859  |
| O  | 1.583097  | 2.427473 | 0.990055  |
| O  | 2.275331  | 4.650699 | 0.928952  |

9

B3LYP-D3 SCF energy: -1808.80851419 a.u.  
 B3LYP-D3 enthalpy: -1808.304557 a.u.  
 B3LYP-D3 free energy: -1808.402298 a.u.  
 wB97XD SCF energy in solution: -1809.92337979 a.u.  
 wB97XD enthalpy in solution: -1809.419423 a.u.  
 wB97XD free energy in solution: -1809.517164 a.u.  
 Three lowest frequencies (cm-1): 16.3383 29.0681 34.1164

#### Cartesian coordinates

| ATOM | X         | Y         | Z         |
|------|-----------|-----------|-----------|
| C    | 1.279043  | 3.057057  | 0.308090  |
| C    | 2.331723  | 3.242754  | -0.591423 |
| C    | 3.444967  | 2.400520  | -0.555263 |
| C    | 3.530349  | 1.360139  | 0.378888  |
| C    | 2.473541  | 1.191906  | 1.284342  |
| C    | 1.356741  | 2.028466  | 1.250101  |
| H    | 0.403618  | 3.698689  | 0.272563  |
| H    | 2.283113  | 4.041350  | -1.327662 |
| H    | 4.251551  | 2.540585  | -1.271817 |
| H    | 2.518638  | 0.376251  | 1.999142  |
| H    | 0.542790  | 1.870036  | 1.952232  |
| C    | 4.668518  | 0.363572  | 0.345382  |
| H    | 4.696229  | -0.202016 | 1.281606  |
| H    | 5.634298  | 0.873195  | 0.234421  |
| C    | 4.514406  | -0.668772 | -0.822160 |
| H    | 4.655727  | -0.130151 | -1.765871 |
| C    | 5.568354  | -1.744845 | -0.710891 |
| C    | 5.387966  | -3.005604 | -0.314336 |
| H    | 6.575056  | -1.407526 | -0.966118 |
| H    | 6.223881  | -3.698773 | -0.258399 |
| H    | 4.408229  | -3.375677 | -0.029821 |
| C    | 3.060887  | -1.149321 | -0.796772 |
| O    | 2.617356  | -1.762068 | 0.193074  |
| O    | 2.344010  | -0.750921 | -1.798407 |
| P    | -1.378344 | -0.252375 | -0.163614 |
| C    | -1.372423 | -0.798092 | 1.584781  |
| C    | -2.549232 | -0.850215 | 2.350702  |
| H    | -3.503246 | -0.585994 | 1.902436  |
| C    | -2.499210 | -1.254668 | 3.683803  |
| H    | -3.412128 | -1.291342 | 4.272033  |
| C    | -1.277762 | -1.621501 | 4.257944  |
| H    | -1.241503 | -1.940129 | 5.296269  |
| C    | -1.837088 | 1.525283  | -0.173380 |
| C    | -1.724293 | 2.198747  | -1.400369 |
| H    | -1.374741 | 1.661987  | -2.279230 |
| C    | -2.034271 | 3.553808  | -1.493262 |

|    |           |           |           |
|----|-----------|-----------|-----------|
| H  | -1.941774 | 4.064374  | -2.447671 |
| C  | -2.442075 | 4.256953  | -0.355599 |
| H  | -2.671914 | 5.316652  | -0.423785 |
| C  | -2.542424 | 3.596602  | 0.870160  |
| H  | -2.849347 | 4.140768  | 1.759134  |
| C  | -2.245375 | 2.234109  | 0.963127  |
| H  | -2.317610 | 1.733188  | 1.922954  |
| C  | -2.818883 | -1.098492 | -0.919237 |
| C  | -4.115037 | -0.563179 | -0.895390 |
| H  | -4.291679 | 0.413528  | -0.453577 |
| C  | -5.176251 | -1.277087 | -1.454355 |
| H  | -6.177938 | -0.856261 | -1.436155 |
| C  | -4.951464 | -2.525659 | -2.039446 |
| H  | -5.779241 | -3.077684 | -2.476076 |
| C  | -3.660883 | -3.059831 | -2.072577 |
| H  | -3.480844 | -4.025998 | -2.535559 |
| C  | -2.596911 | -2.346863 | -1.520092 |
| H  | -1.588146 | -2.752798 | -1.556866 |
| C  | -0.110244 | -1.594445 | 3.493784  |
| H  | 0.837187  | -1.898597 | 3.929597  |
| C  | -0.151029 | -1.187575 | 2.157943  |
| H  | 0.758943  | -1.201415 | 1.562594  |
| Cu | 0.577767  | -0.619976 | -1.129188 |

s-TS1

B3LYP-D3 SCF energy: -2219.48918298 a.u.  
 B3LYP-D3 enthalpy: -2218.805425 a.u.  
 B3LYP-D3 free energy: -2218.924433 a.u.  
 wB97XD SCF energy in solution: -2220.56750501 a.u.  
 wB97XD enthalpy in solution: -2219.883747 a.u.  
 wB97XD free energy in solution: -2220.002755 a.u.  
 Three lowest frequencies (cm<sup>-1</sup>): -282.1590 10.1694 18.4122  
 Imaginary frequency: -282.1590 cm<sup>-1</sup>

Cartesian coordinates

| ATOM | X        | Y         | Z         |
|------|----------|-----------|-----------|
| C    | 4.616290 | -1.528877 | 1.750598  |
| C    | 3.737809 | -1.197604 | 0.721093  |
| C    | 3.669011 | -1.959689 | -0.466095 |
| C    | 4.516874 | -3.081181 | -0.550865 |
| C    | 5.391653 | -3.417295 | 0.480105  |
| C    | 5.452444 | -2.643371 | 1.641294  |
| H    | 4.646952 | -0.910081 | 2.645279  |
| H    | 3.093376 | -0.332539 | 0.851590  |
| H    | 4.476869 | -3.700943 | -1.443158 |
| H    | 6.029700 | -4.291620 | 0.375392  |
| H    | 6.134941 | -2.903771 | 2.445639  |
| C    | 2.742913 | -1.661764 | -1.568094 |
| C    | 2.168645 | -0.390009 | -1.719198 |
| H    | 2.879382 | -2.253495 | -2.473683 |
| H    | 2.338868 | 0.295457  | -0.890399 |
| C    | 1.348163 | 0.136957  | -2.740486 |
| C    | 1.252031 | 1.663501  | -2.917972 |
| H    | 1.292955 | -0.443234 | -3.666914 |

|    |           |           |           |
|----|-----------|-----------|-----------|
| H  | 0.285739  | 1.930361  | -3.370210 |
| H  | 2.017619  | 2.012226  | -3.628458 |
| Cu | -0.317495 | -0.441193 | -1.653675 |
| B  | 1.432867  | 2.466061  | -1.572041 |
| C  | 1.111619  | 3.155849  | 0.593788  |
| C  | -0.073389 | 4.124525  | 0.625238  |
| H  | 0.077782  | 4.915638  | 1.367083  |
| H  | -0.978996 | 3.573835  | 0.884098  |
| H  | -0.227459 | 4.587971  | -0.354042 |
| C  | 2.423839  | 3.793836  | 0.001377  |
| C  | 3.706099  | 3.083199  | 0.454019  |
| H  | 3.919036  | 3.274645  | 1.510874  |
| H  | 4.545177  | 3.452395  | -0.142949 |
| H  | 3.642406  | 2.001165  | 0.303409  |
| C  | 2.559525  | 5.300427  | 0.203888  |
| H  | 3.487535  | 5.649459  | -0.259608 |
| H  | 2.596295  | 5.546855  | 1.271147  |
| H  | 1.729613  | 5.843353  | -0.253360 |
| C  | 1.271115  | 2.476562  | 1.950735  |
| H  | 2.018300  | 1.680738  | 1.919084  |
| H  | 0.319389  | 2.027230  | 2.249785  |
| H  | 1.566709  | 3.204145  | 2.715037  |
| O  | 2.285188  | 3.530301  | -1.423349 |
| O  | 0.796819  | 2.131923  | -0.393684 |
| P  | -1.941748 | -0.368380 | -0.085494 |
| C  | -2.643368 | 1.297625  | 0.222518  |
| C  | -3.068655 | 1.739399  | 1.483568  |
| H  | -2.944206 | 1.100764  | 2.352999  |
| C  | -3.646154 | 3.003539  | 1.625822  |
| H  | -3.969639 | 3.340564  | 2.606938  |
| C  | -3.805474 | 3.832497  | 0.512778  |
| H  | -4.254231 | 4.815406  | 0.626699  |
| C  | -3.410041 | -1.437491 | -0.355313 |
| C  | -3.192444 | -2.678351 | -0.977064 |
| H  | -2.189738 | -2.953023 | -1.293968 |
| C  | -4.258805 | -3.553755 | -1.182066 |
| H  | -4.081806 | -4.512851 | -1.661039 |
| C  | -5.548833 | -3.196038 | -0.781415 |
| H  | -6.379243 | -3.876900 | -0.947971 |
| C  | -5.771101 | -1.959168 | -0.172519 |
| H  | -6.774005 | -1.674823 | 0.134855  |
| C  | -4.706998 | -1.080601 | 0.041803  |
| H  | -4.889418 | -0.117932 | 0.509984  |
| C  | -1.248954 | -0.952204 | 1.511524  |
| C  | -2.048446 | -1.467071 | 2.544086  |
| H  | -3.126639 | -1.521553 | 2.420945  |
| C  | -1.457506 | -1.936602 | 3.717837  |
| H  | -2.081839 | -2.335618 | 4.512805  |
| C  | -0.067182 | -1.916095 | 3.862346  |
| H  | 0.389411  | -2.302565 | 4.769454  |
| C  | 0.735978  | -1.419736 | 2.833583  |
| H  | 1.818584  | -1.432689 | 2.917803  |
| C  | 0.146130  | -0.935005 | 1.666320  |
| H  | 0.771882  | -0.553548 | 0.865876  |
| C  | -3.372196 | 3.402379  | -0.744159 |
| H  | -3.477557 | 4.050884  | -1.609432 |

|   |           |           |           |
|---|-----------|-----------|-----------|
| C | -2.785159 | 2.145651  | -0.886011 |
| H | -2.420796 | 1.818327  | -1.856998 |
| C | 1.054608  | -3.162627 | -1.159113 |
| O | 1.589166  | -4.023750 | -0.544352 |
| O | 0.089584  | -2.701310 | -1.719751 |

s-TS2

B3LYP-D3 SCF energy: -2219.46775995 a.u.  
 B3LYP-D3 enthalpy: -2218.784101 a.u.  
 B3LYP-D3 free energy: -2218.903241 a.u.  
 WB97XD SCF energy in solution: -2220.55636311 a.u.  
 WB97XD enthalpy in solution: -2219.872704 a.u.  
 WB97XD free energy in solution: -2219.991844 a.u.  
 Three lowest frequencies (cm-1): -194.2549 12.7136 23.3492  
 Imaginary frequency: -194.2549 cm-1

Cartesian coordinates

| ATOM | X         | Y         | Z         |
|------|-----------|-----------|-----------|
| C    | 1.704981  | 3.597865  | -1.968902 |
| C    | 1.659082  | 2.600940  | -1.000772 |
| C    | 1.698571  | 2.914937  | 0.376131  |
| C    | 1.799436  | 4.277112  | 0.724645  |
| C    | 1.842547  | 5.276803  | -0.246418 |
| C    | 1.793893  | 4.945564  | -1.602033 |
| H    | 1.663183  | 3.322870  | -3.020048 |
| H    | 1.572659  | 1.565971  | -1.318799 |
| H    | 1.834047  | 4.547299  | 1.777838  |
| H    | 1.915458  | 6.318191  | 0.058071  |
| H    | 1.828819  | 5.722005  | -2.361517 |
| C    | 1.624733  | 1.910016  | 1.434633  |
| C    | 1.397116  | 0.587412  | 1.245796  |
| H    | 1.723442  | 2.275598  | 2.455113  |
| H    | 1.281546  | 0.236495  | 0.221678  |
| C    | 1.245155  | -0.434535 | 2.291648  |
| C    | 1.540318  | -1.917386 | 1.898700  |
| H    | 1.804343  | -0.179093 | 3.188728  |
| H    | 0.712999  | -2.411669 | 1.353286  |
| H    | 1.678723  | -2.494829 | 2.815940  |
| Cu   | -0.784706 | -0.790566 | 1.634254  |
| B    | 2.794321  | -1.898312 | 0.954271  |
| C    | 3.976074  | -1.742528 | -1.005136 |
| C    | 4.241526  | -3.148804 | -1.553377 |
| H    | 5.209642  | -3.208718 | -2.060829 |
| H    | 3.457076  | -3.405634 | -2.272667 |
| H    | 4.219056  | -3.892033 | -0.750593 |
| C    | 4.887280  | -1.366206 | 0.226880  |
| C    | 5.054439  | 0.146100  | 0.420101  |
| H    | 5.677900  | 0.584292  | -0.366233 |
| H    | 5.536994  | 0.324802  | 1.385714  |
| H    | 4.087728  | 0.657788  | 0.433846  |
| C    | 6.246635  | -2.059195 | 0.257027  |
| H    | 6.795249  | -1.748594 | 1.151506  |
| H    | 6.840535  | -1.782420 | -0.621562 |
| H    | 6.145780  | -3.146510 | 0.284835  |

|   |           |           |           |
|---|-----------|-----------|-----------|
| C | 3.966151  | -0.720033 | -2.138578 |
| H | 3.640223  | 0.262867  | -1.791414 |
| H | 3.275274  | -1.048633 | -2.922514 |
| H | 4.963420  | -0.621980 | -2.581874 |
| O | 4.100716  | -1.842375 | 1.358701  |
| O | 2.648223  | -1.775064 | -0.412583 |
| P | -2.118110 | -0.460683 | -0.112791 |
| C | -3.897667 | -0.738907 | 0.209375  |
| C | -4.910200 | -0.085050 | -0.509673 |
| H | -4.651021 | 0.641714  | -1.274578 |
| C | -6.250163 | -0.352994 | -0.228382 |
| H | -7.030808 | 0.157678  | -0.785600 |
| C | -6.587822 | -1.267453 | 0.773304  |
| H | -7.632531 | -1.469133 | 0.993657  |
| C | -1.969080 | 1.283037  | -0.653139 |
| C | -2.126091 | 1.675405  | -1.991569 |
| H | -2.323659 | 0.931294  | -2.758080 |
| C | -2.006272 | 3.020455  | -2.341216 |
| H | -2.117254 | 3.319024  | -3.380213 |
| C | -1.727141 | 3.977855  | -1.362883 |
| H | -1.606668 | 5.020424  | -1.641193 |
| C | -1.566337 | 3.591040  | -0.031826 |
| H | -1.312050 | 4.327025  | 0.723443  |
| C | -1.679543 | 2.247779  | 0.324623  |
| H | -1.505912 | 1.947388  | 1.355280  |
| C | -1.694812 | -1.462989 | -1.588331 |
| C | -2.643761 | -1.871513 | -2.536838 |
| H | -3.693471 | -1.631562 | -2.396016 |
| C | -2.241816 | -2.599071 | -3.658983 |
| H | -2.982622 | -2.915380 | -4.388377 |
| C | -0.895380 | -2.924622 | -3.841381 |
| H | -0.588140 | -3.494217 | -4.714345 |
| C | 0.051203  | -2.526947 | -2.894186 |
| H | 1.099450  | -2.785585 | -3.015178 |
| C | -0.345006 | -1.803241 | -1.770466 |
| H | 0.405633  | -1.516615 | -1.041538 |
| C | -5.584201 | -1.909638 | 1.501874  |
| H | -5.843451 | -2.607444 | 2.292991  |
| C | -4.242753 | -1.642862 | 1.225232  |
| H | -3.458280 | -2.120942 | 1.807940  |
| C | -0.382927 | -0.047227 | 3.670438  |
| O | -0.985648 | -1.098576 | 3.889919  |
| O | -0.255269 | 1.098488  | 4.008028  |

s-TS3

B3LYP-D3 SCF energy: -2219.48981379 a.u.

B3LYP-D3 enthalpy: -2218.806205 a.u.

B3LYP-D3 free energy: -2218.928435 a.u.

wB97XD SCF energy in solution: -2220.57073114 a.u.

wB97XD enthalpy in solution: -2219.887122 a.u.

wB97XD free energy in solution: -2220.009352 a.u.

Three lowest frequencies (cm-1): -209.2664 6.4581 12.4790

Imaginary frequency: -209.2664 cm-1

Cartesian coordinates

| ATOM | X         | Y         | Z         |
|------|-----------|-----------|-----------|
| C    | -0.367364 | 3.214269  | 2.041565  |
| C    | 0.132656  | 1.932791  | 1.821310  |
| C    | 1.066160  | 1.672037  | 0.791596  |
| C    | 1.468825  | 2.770541  | 0.000874  |
| C    | 0.965376  | 4.052196  | 0.220926  |
| C    | 0.040660  | 4.287616  | 1.243473  |
| H    | -1.099681 | 3.367328  | 2.830532  |
| H    | -0.242807 | 1.108319  | 2.421846  |
| H    | 2.177371  | 2.600644  | -0.807511 |
| H    | 1.300279  | 4.873300  | -0.409343 |
| H    | -0.356320 | 5.284746  | 1.412044  |
| C    | 1.566550  | 0.312489  | 0.480847  |
| C    | 1.815536  | -0.645611 | 1.530836  |
| H    | 2.275902  | 0.289589  | -0.346943 |
| H    | 1.469554  | -0.385624 | 2.532228  |
| C    | 2.404835  | -1.883721 | 1.384795  |
| C    | 2.987150  | -2.349541 | 0.065156  |
| H    | 2.690970  | -2.421312 | 2.282573  |
| H    | 2.224235  | -2.261595 | -0.724061 |
| H    | 3.270840  | -3.406975 | 0.135131  |
| Cu   | -0.156778 | -0.482622 | -0.283879 |
| B    | 4.224761  | -1.453532 | -0.318079 |
| C    | 5.533928  | 0.037151  | -1.456805 |
| C    | 6.383102  | -0.740244 | -2.469022 |
| H    | 7.365002  | -0.277120 | -2.612046 |
| H    | 5.861787  | -0.756911 | -3.431056 |
| H    | 6.527928  | -1.774944 | -2.142888 |
| C    | 6.034767  | -0.119764 | 0.026746  |
| C    | 5.541216  | 1.001972  | 0.950696  |
| H    | 6.048267  | 1.949675  | 0.741243  |
| H    | 5.745712  | 0.718041  | 1.987304  |
| H    | 4.461160  | 1.149595  | 0.851728  |
| C    | 7.538893  | -0.318344 | 0.184607  |
| H    | 7.784940  | -0.432225 | 1.245071  |
| H    | 8.086067  | 0.548805  | -0.202632 |
| H    | 7.882637  | -1.213067 | -0.339122 |
| C    | 5.333768  | 1.476959  | -1.922604 |
| H    | 4.606104  | 2.001000  | -1.298762 |
| H    | 4.963861  | 1.482470  | -2.953019 |
| H    | 6.280673  | 2.028211  | -1.895379 |
| O    | 5.355257  | -1.332065 | 0.454150  |
| O    | 4.235583  | -0.615848 | -1.411745 |
| P    | -2.388761 | -0.204224 | -0.464363 |
| C    | -2.905967 | 1.341533  | -1.299244 |
| C    | -2.013861 | 2.424545  | -1.237098 |
| H    | -1.050838 | 2.311028  | -0.749448 |
| C    | -2.366394 | 3.654652  | -1.791765 |
| H    | -1.670623 | 4.485659  | -1.722172 |
| C    | -3.599725 | 3.807381  | -2.429507 |
| H    | -3.871199 | 4.763574  | -2.869022 |
| C    | -3.427046 | -1.549088 | -1.138836 |
| C    | -2.849185 | -2.418873 | -2.074635 |
| H    | -1.806022 | -2.289203 | -2.352194 |
| C    | -3.601395 | -3.455112 | -2.629282 |

|   |           |           |           |
|---|-----------|-----------|-----------|
| H | -3.145833 | -4.127286 | -3.351025 |
| C | -4.931779 | -3.634995 | -2.244133 |
| H | -5.515543 | -4.446388 | -2.670304 |
| C | -5.509811 | -2.780367 | -1.300949 |
| H | -6.541543 | -2.926769 | -0.992906 |
| C | -4.761339 | -1.741581 | -0.747222 |
| H | -5.205282 | -1.087519 | -0.001697 |
| C | -2.953009 | -0.010439 | 1.275926  |
| C | -3.489326 | 1.183818  | 1.773040  |
| H | -3.662417 | 2.022468  | 1.106645  |
| C | -3.783773 | 1.305207  | 3.133583  |
| H | -4.197513 | 2.236520  | 3.511225  |
| C | -3.543007 | 0.241640  | 4.004810  |
| H | -3.765272 | 0.343274  | 5.063517  |
| C | -3.010569 | -0.954221 | 3.512647  |
| H | -2.814429 | -1.785696 | 4.183706  |
| C | -2.714020 | -1.079391 | 2.156888  |
| H | -2.291201 | -2.006715 | 1.780719  |
| C | -4.483853 | 2.727829  | -2.507340 |
| H | -5.441152 | 2.842442  | -3.008853 |
| C | -4.143520 | 1.498624  | -1.940198 |
| H | -4.836610 | 0.665026  | -2.002952 |
| C | 0.289997  | -2.967300 | 1.489796  |
| O | 0.276923  | -3.395878 | 2.592680  |
| O | -0.135977 | -2.770368 | 0.387075  |

s-TS4

B3LYP-D3 SCF energy: -2219.47023368 a.u.  
 B3LYP-D3 enthalpy: -2218.786451 a.u.  
 B3LYP-D3 free energy: -2218.907036 a.u.  
 WB97XD SCF energy in solution: -2220.55598880 a.u.  
 WB97XD enthalpy in solution: -2219.872206 a.u.  
 WB97XD free energy in solution: -2219.992791 a.u.  
 Three lowest frequencies (cm<sup>-1</sup>): -173.0510 11.7963 12.1135  
 Imaginary frequency: -173.0510 cm<sup>-1</sup>

Cartesian coordinates

| ATOM | X        | Y         | Z         |
|------|----------|-----------|-----------|
| C    | 0.843071 | 3.309651  | 0.761185  |
| C    | 1.078028 | 1.942995  | 0.899197  |
| C    | 1.360494 | 1.124050  | -0.229960 |
| C    | 1.362624 | 1.766485  | -1.503506 |
| C    | 1.113288 | 3.134649  | -1.626681 |
| C    | 0.855988 | 3.917976  | -0.498569 |
| H    | 0.653255 | 3.906563  | 1.650181  |
| H    | 1.089721 | 1.499496  | 1.888622  |
| H    | 1.569262 | 1.164559  | -2.382872 |
| H    | 1.129691 | 3.589247  | -2.613893 |
| H    | 0.670551 | 4.983542  | -0.598127 |
| C    | 1.602020 | -0.340644 | -0.144507 |
| C    | 1.647278 | -0.997363 | 1.165719  |
| H    | 2.397821 | -0.627158 | -0.825480 |
| H    | 0.921538 | -0.657747 | 1.904439  |
| C    | 2.436151 | -2.032748 | 1.512344  |

|    |           |           |           |
|----|-----------|-----------|-----------|
| C  | 3.512549  | -2.654579 | 0.640956  |
| H  | 2.324445  | -2.439234 | 2.516138  |
| H  | 3.076132  | -3.032396 | -0.291818 |
| H  | 3.961083  | -3.506424 | 1.164788  |
| Cu | -0.548544 | 0.221807  | -0.681921 |
| B  | 4.596012  | -1.553014 | 0.332975  |
| C  | 5.910680  | 0.258591  | 0.741791  |
| C  | 4.963480  | 1.339547  | 1.279678  |
| H  | 5.275517  | 2.342018  | 0.968792  |
| H  | 4.964911  | 1.295403  | 2.373043  |
| H  | 3.937810  | 1.170777  | 0.939889  |
| C  | 5.778904  | 0.039118  | -0.812198 |
| C  | 7.017416  | -0.609628 | -1.440100 |
| H  | 7.863524  | 0.084764  | -1.473158 |
| H  | 6.777186  | -0.916689 | -2.462548 |
| H  | 7.316233  | -1.500924 | -0.879479 |
| C  | 5.358505  | 1.273830  | -1.606210 |
| H  | 5.281498  | 1.017734  | -2.667977 |
| H  | 6.098898  | 2.075207  | -1.500607 |
| H  | 4.385363  | 1.647954  | -1.279722 |
| C  | 7.331192  | 0.499201  | 1.244090  |
| H  | 7.989119  | -0.339897 | 1.007111  |
| H  | 7.319469  | 0.622084  | 2.331778  |
| H  | 7.749469  | 1.410590  | 0.801313  |
| O  | 4.708807  | -0.940337 | -0.894772 |
| O  | 5.434453  | -1.006967 | 1.276475  |
| P  | -2.655245 | -0.016392 | -0.025739 |
| C  | -3.588046 | 1.545307  | 0.191455  |
| C  | -2.837173 | 2.712432  | 0.404016  |
| H  | -1.751199 | 2.663676  | 0.403884  |
| C  | -3.479347 | 3.934672  | 0.602913  |
| H  | -2.888183 | 4.831852  | 0.764714  |
| C  | -4.874058 | 4.004029  | 0.579334  |
| H  | -5.374599 | 4.957155  | 0.727159  |
| C  | -3.661044 | -1.086769 | -1.116879 |
| C  | -3.258634 | -1.226434 | -2.453578 |
| H  | -2.346750 | -0.744866 | -2.796573 |
| C  | -4.003194 | -2.021073 | -3.327031 |
| H  | -3.681675 | -2.132312 | -4.358657 |
| C  | -5.143202 | -2.685228 | -2.870335 |
| H  | -5.717774 | -3.308619 | -3.550096 |
| C  | -5.535159 | -2.566634 | -1.533589 |
| H  | -6.411079 | -3.099049 | -1.172876 |
| C  | -4.794575 | -1.775286 | -0.656071 |
| H  | -5.083166 | -1.708234 | 0.389593  |
| C  | -2.674370 | -0.863970 | 1.601308  |
| C  | -3.566586 | -0.541231 | 2.632686  |
| H  | -4.290113 | 0.257840  | 2.498274  |
| C  | -3.515811 | -1.239269 | 3.841679  |
| H  | -4.207038 | -0.983502 | 4.640342  |
| C  | -2.577531 | -2.257304 | 4.026053  |
| H  | -2.537787 | -2.794317 | 4.969941  |
| C  | -1.683895 | -2.578617 | 3.000427  |
| H  | -0.943493 | -3.361057 | 3.140346  |
| C  | -1.726102 | -1.884136 | 1.792128  |
| H  | -1.015793 | -2.127876 | 1.004825  |



|   |           |           |           |
|---|-----------|-----------|-----------|
| C | -5.626523 | 2.848550  | 0.352056  |
| H | -6.711395 | 2.902283  | 0.321050  |
| C | -4.988708 | 1.622463  | 0.157359  |
| H | -5.579242 | 0.731948  | -0.035763 |
| C | 0.517378  | -1.667001 | -1.523199 |
| O | 0.194840  | -1.003763 | -2.505327 |
| O | 0.613484  | -2.770135 | -1.066805 |

s-TS5

B3LYP-D3 SCF energy: -2146.61958138 a.u.  
 B3LYP-D3 enthalpy: -2145.897221 a.u.  
 B3LYP-D3 free energy: -2146.015638 a.u.  
 wB97XD SCF energy in solution: -2147.71134312 a.u.  
 wB97XD enthalpy in solution: -2146.988983 a.u.  
 wB97XD free energy in solution: -2147.107400 a.u.  
 Three lowest frequencies (cm-1): -298.2200 20.0898 23.4719  
 Imaginary frequency: -298.2200 cm-1

Cartesian coordinates

| ATOM | X         | Y         | Z         |
|------|-----------|-----------|-----------|
| C    | -0.114716 | 2.983270  | 1.665718  |
| C    | 0.492425  | 1.988936  | 0.902098  |
| C    | 0.806859  | 2.183358  | -0.467687 |
| C    | 0.433587  | 3.431494  | -1.027655 |
| C    | -0.165620 | 4.427686  | -0.258144 |
| C    | -0.442338 | 4.219573  | 1.098665  |
| H    | -0.330612 | 2.790571  | 2.714585  |
| H    | 0.758183  | 1.043801  | 1.366557  |
| H    | 0.622255  | 3.610282  | -2.083780 |
| H    | -0.424901 | 5.376254  | -0.724365 |
| H    | -0.908580 | 4.998465  | 1.696042  |
| C    | 1.448171  | 1.120456  | -1.249092 |
| C    | 2.576506  | 1.415297  | -2.126433 |
| H    | 1.581752  | 0.206963  | -0.672764 |
| H    | 2.697167  | 2.458290  | -2.426088 |
| C    | 3.439144  | 0.514085  | -2.662217 |
| C    | 3.437752  | -0.971843 | -2.331086 |
| H    | 4.247812  | 0.868767  | -3.296258 |
| H    | 3.960810  | -1.540013 | -3.108284 |
| H    | 2.412806  | -1.361843 | -2.248474 |
| Cu   | -1.206615 | 0.212454  | -1.788870 |
| B    | 4.185165  | -1.013940 | -0.953062 |
| C    | 4.501020  | -0.475098 | 1.234606  |
| C    | 4.286780  | 1.043826  | 1.265866  |
| H    | 4.465507  | 1.483124  | 0.279827  |
| H    | 4.942806  | 1.527072  | 1.997815  |
| H    | 3.247172  | 1.254427  | 1.532581  |
| C    | 5.869563  | -0.895910 | 0.585893  |
| C    | 6.290873  | -2.325419 | 0.949066  |
| H    | 6.619869  | -2.399511 | 1.991134  |
| H    | 7.119139  | -2.625891 | 0.300040  |
| H    | 5.464135  | -3.025280 | 0.790797  |
| C    | 7.020193  | 0.077205  | 0.826073  |
| H    | 7.925275  | -0.291462 | 0.332444  |
| H    | 7.229174  | 0.174421  | 1.897843  |

|   |           |           |           |
|---|-----------|-----------|-----------|
| H | 6.792694  | 1.065334  | 0.420858  |
| C | 4.231300  | -1.075927 | 2.610411  |
| H | 4.207367  | -2.168406 | 2.576958  |
| H | 3.266307  | -0.722479 | 2.985749  |
| H | 5.007073  | -0.766900 | 3.320371  |
| O | 5.552369  | -0.895773 | -0.828732 |
| O | 3.544170  | -1.010273 | 0.275660  |
| P | -2.402849 | -0.461076 | -0.054173 |
| C | -3.495624 | 0.836078  | 0.625524  |
| C | -3.109835 | 2.171138  | 0.432847  |
| H | -2.201589 | 2.406727  | -0.114430 |
| C | -3.883575 | 3.203132  | 0.964152  |
| H | -3.562840 | 4.230516  | 0.822734  |
| C | -5.048944 | 2.910368  | 1.674898  |
| H | -5.653623 | 3.715694  | 2.083346  |
| C | -3.487140 | -1.902149 | -0.379496 |
| C | -4.058763 | -2.021914 | -1.655324 |
| H | -3.820906 | -1.285568 | -2.420283 |
| C | -4.919664 | -3.080458 | -1.944772 |
| H | -5.357571 | -3.166022 | -2.935342 |
| C | -5.207318 | -4.033554 | -0.964415 |
| H | -5.871969 | -4.862608 | -1.191195 |
| C | -4.632095 | -3.926611 | 0.304105  |
| H | -4.847928 | -4.671965 | 1.064706  |
| C | -3.773879 | -2.865726 | 0.598611  |
| H | -3.319016 | -2.792260 | 1.582273  |
| C | -1.293561 | -0.984661 | 1.303582  |
| C | -0.072279 | -1.575310 | 0.945209  |
| H | 0.185897  | -1.695955 | -0.103878 |
| C | 0.842251  | -1.956689 | 1.924466  |
| H | 1.801470  | -2.361599 | 1.622983  |
| C | 0.538623  | -1.751355 | 3.272869  |
| H | 1.255675  | -2.034846 | 4.038542  |
| C | -0.675392 | -1.162598 | 3.637346  |
| H | -0.905469 | -0.992199 | 4.685597  |
| C | -1.590940 | -0.774919 | 2.657165  |
| H | -2.520150 | -0.290819 | 2.942794  |
| C | -5.442896 | 1.581347  | 1.858953  |
| H | -6.353373 | 1.352950  | 2.406394  |
| C | -4.670039 | 0.543885  | 1.337116  |
| H | -4.984198 | -0.487133 | 1.472480  |
| C | 0.269857  | -0.168051 | -4.341496 |
| H | 1.031522  | 0.308769  | -4.967123 |
| H | -0.576424 | -0.475057 | -4.964476 |
| H | 0.709133  | -1.057768 | -3.869921 |
| O | -0.195059 | 0.765529  | -3.363561 |
| H | 0.583348  | 0.934309  | -2.615124 |

s-TS6  
B3LYP-D3 SCF energy: -1808.76782324 a.u.  
B3LYP-D3 enthalpy: -1808.266870 a.u.  
B3LYP-D3 free energy: -1808.362625 a.u.  
WB97XD SCF energy in solution: -1809.86934162 a.u.

wB97XD enthalpy in solution: -1809.368388 a.u.  
wB97XD free energy in solution: -1809.464143 a.u.  
Three lowest frequencies (cm-1): -202.5497 21.4018 30.8691  
Imaginary frequency: -202.5497 cm-1

Cartesian coordinates

| ATOM | X         | Y         | Z         |
|------|-----------|-----------|-----------|
| C    | 2.394458  | 0.800573  | 2.056538  |
| C    | 3.035561  | 0.037492  | 1.068842  |
| C    | 3.378399  | 0.615345  | -0.168649 |
| C    | 3.071416  | 1.968414  | -0.383256 |
| C    | 2.440840  | 2.724459  | 0.601954  |
| C    | 2.092133  | 2.140589  | 1.824005  |
| H    | 2.134883  | 0.331176  | 3.000484  |
| H    | 3.287654  | -0.995931 | 1.287570  |
| H    | 3.320080  | 2.425175  | -1.338241 |
| H    | 2.190713  | 3.762837  | 0.406078  |
| H    | 1.583932  | 2.728033  | 2.583287  |
| C    | 3.971304  | -0.236112 | -1.282929 |
| H    | 4.626163  | 0.379944  | -1.909978 |
| H    | 4.592283  | -1.028003 | -0.845771 |
| C    | 2.878103  | -0.849858 | -2.139506 |
| C    | 2.250695  | -2.040114 | -1.868366 |
| H    | 2.590558  | -0.307769 | -3.036724 |
| H    | 1.505527  | -2.372729 | -2.593932 |
| C    | 2.407871  | -2.883059 | -0.681030 |
| H    | 2.189401  | -3.929558 | -0.880119 |
| H    | 3.333855  | -2.747622 | -0.125461 |
| P    | -0.820121 | 0.096110  | -0.078316 |
| C    | -0.703649 | 1.888324  | -0.466211 |
| C    | -1.083407 | 2.902105  | 0.421264  |
| H    | -1.510595 | 2.649383  | 1.385981  |
| C    | -0.902593 | 4.244165  | 0.075122  |
| H    | -1.197176 | 5.022628  | 0.773898  |
| C    | -0.348653 | 4.584599  | -1.159519 |
| H    | -0.211229 | 5.628833  | -1.426907 |
| C    | -2.073521 | -0.534375 | -1.264199 |
| C    | -2.072673 | -1.914015 | -1.528086 |
| H    | -1.340790 | -2.556510 | -1.044189 |
| C    | -3.021470 | -2.455390 | -2.396582 |
| H    | -3.019087 | -3.523961 | -2.593682 |
| C    | -3.965258 | -1.629423 | -3.012303 |
| H    | -4.698867 | -2.053827 | -3.692629 |
| C    | -3.962773 | -0.255995 | -2.756908 |
| H    | -4.692800 | 0.389768  | -3.237853 |
| C    | -3.020568 | 0.292872  | -1.885296 |
| H    | -3.014987 | 1.363047  | -1.699117 |
| C    | -1.632865 | -0.020874 | 1.557649  |
| C    | -2.949330 | 0.424200  | 1.760919  |
| H    | -3.513914 | 0.843324  | 0.932456  |
| C    | -3.536763 | 0.317420  | 3.020381  |
| H    | -4.555670 | 0.663014  | 3.173039  |
| C    | -2.819361 | -0.244943 | 4.081497  |
| H    | -3.281955 | -0.333802 | 5.060882  |
| C    | -1.517795 | -0.705554 | 3.879010  |
| H    | -0.964459 | -1.162352 | 4.694641  |

|    |           |           |           |
|----|-----------|-----------|-----------|
| C  | -0.922923 | -0.595957 | 2.620144  |
| H  | 0.078777  | -0.980299 | 2.459068  |
| C  | 0.031527  | 3.576252  | -2.050974 |
| H  | 0.468350  | 3.833230  | -3.012255 |
| C  | -0.136639 | 2.238216  | -1.702689 |
| H  | 0.185330  | 1.456656  | -2.386434 |
| Cu | 1.136041  | -0.986524 | -0.330018 |
| C  | 1.039356  | -3.049806 | 0.945469  |
| O  | 1.663291  | -2.772210 | 1.947745  |
| O  | 0.004476  | -3.522097 | 0.528934  |

s-TS7

B3LYP-D3 SCF energy: -1620.17281048 a.u.  
 B3LYP-D3 enthalpy: -1619.689969 a.u.  
 B3LYP-D3 free energy: -1619.777979 a.u.  
 WB97XD SCF energy in solution: -1621.29078552 a.u.  
 WB97XD enthalpy in solution: -1620.807944 a.u.  
 WB97XD free energy in solution: -1620.895954 a.u.  
 Three lowest frequencies (cm<sup>-1</sup>): -50.5750 -1.1755 19.2526  
 Imaginary frequency: -50.5750 cm<sup>-1</sup>

Cartesian coordinates

| ATOM | X         | Y         | Z         |
|------|-----------|-----------|-----------|
| C    | 6.813506  | 1.279959  | 0.190897  |
| C    | 5.425774  | 1.386220  | 0.059721  |
| C    | 4.620924  | 0.245581  | -0.040018 |
| C    | 5.240873  | -1.013811 | -0.009493 |
| C    | 6.623960  | -1.124210 | 0.125012  |
| C    | 7.417711  | 0.023227  | 0.226418  |
| H    | 7.419820  | 2.179722  | 0.264263  |
| H    | 4.961120  | 2.370098  | 0.032649  |
| H    | 4.628531  | -1.906911 | -0.100470 |
| H    | 7.086005  | -2.108260 | 0.150106  |
| H    | 8.496263  | -0.064068 | 0.329876  |
| C    | 3.109913  | 0.359109  | -0.188922 |
| H    | 2.635521  | -0.119176 | 0.681691  |
| H    | 2.831897  | 1.420207  | -0.141013 |
| C    | 2.577001  | -0.252035 | -1.472858 |
| C    | 2.226931  | -1.610252 | -1.602179 |
| H    | 2.818484  | 0.284250  | -2.385628 |
| H    | 2.071190  | -1.948321 | -2.631280 |
| C    | 1.833115  | -2.530352 | -0.589794 |
| H    | 1.580164  | -3.541917 | -0.887257 |
| H    | 2.188920  | -2.419982 | 0.432550  |
| P    | -1.465136 | -0.048922 | -0.100516 |
| C    | -2.238792 | 1.307280  | -1.068022 |
| C    | -3.064718 | 2.285101  | -0.492959 |
| H    | -3.249106 | 2.279504  | 0.577751  |
| C    | -3.637283 | 3.276791  | -1.291443 |
| H    | -4.271514 | 4.034271  | -0.838672 |
| C    | -3.391147 | 3.300021  | -2.666426 |
| H    | -3.835773 | 4.075032  | -3.284850 |
| C    | -2.787389 | -1.315426 | 0.073648  |
| C    | -2.382732 | -2.646538 | 0.258922  |

|    |           |           |           |
|----|-----------|-----------|-----------|
| H  | -1.320049 | -2.883016 | 0.248643  |
| C  | -3.334617 | -3.651006 | 0.438017  |
| H  | -3.012826 | -4.679010 | 0.580674  |
| C  | -4.695609 | -3.337033 | 0.422757  |
| H  | -5.436728 | -4.120692 | 0.555510  |
| C  | -5.104640 | -2.015707 | 0.225052  |
| H  | -6.163083 | -1.770270 | 0.202145  |
| C  | -4.156167 | -1.006820 | 0.049853  |
| H  | -4.481765 | 0.015837  | -0.115880 |
| C  | -1.248332 | 0.654447  | 1.582169  |
| C  | -2.218120 | 0.555958  | 2.589976  |
| H  | -3.143455 | 0.018400  | 2.405361  |
| C  | -1.990731 | 1.138385  | 3.838829  |
| H  | -2.745611 | 1.055982  | 4.616222  |
| C  | -0.797193 | 1.818169  | 4.091165  |
| H  | -0.622180 | 2.266092  | 5.065555  |
| C  | 0.176140  | 1.912366  | 3.092883  |
| H  | 1.111209  | 2.430357  | 3.287172  |
| C  | -0.046035 | 1.329943  | 1.845727  |
| H  | 0.714969  | 1.390967  | 1.071988  |
| C  | -2.562028 | 2.334799  | -3.243482 |
| H  | -2.357031 | 2.357845  | -4.310233 |
| C  | -1.982165 | 1.347742  | -2.446366 |
| H  | -1.311879 | 0.611567  | -2.885069 |
| Cu | 0.441898  | -0.855383 | -0.876157 |
